# Supplementary material for: Stereoselective strain-release Ferrier rearrangement: the dual role of catalysts
Source: Royal Society of Chemistry journal article supplement (doi:10.1039/d4qo00410h), 2024-01-01

## Supporting Information

# Stereoselective Strain-Release Ferrier Rearrangement: The Dual Role of Catalysts

Huajun Zhang,<sup>†,a</sup> Aoxin Guo,<sup>†,a</sup>, Han Ding,<sup>†,a</sup>, Yuan Xu,<sup>a</sup> Yuhan Zhang,<sup>a</sup> Dan Yang,<sup>a</sup> and Xue-Wei Liu<sup>\*,a</sup>

<sup>a</sup>School of Chemistry, Chemical Engineering and Biotechnology, Nanyang Technological University, 21 Nanyang Link, Singapore 637371, Singapore.

<sup>†</sup>These authors contributed equally to this work.

\*correspondence: [xuewei@ntu.edu.sg](mailto:xuewei@ntu.edu.sg)

## Table of contents

|                                                               |     |
|---------------------------------------------------------------|-----|
| <b>Supplementary Note</b>                                     | S4  |
| <b>Supplementary Methods</b>                                  | S5  |
| <b>Section 1. Synthesis of glycal donors.</b>                 | S5  |
| Synthesis of compound <b>S1</b>                               | S5  |
| Synthesis of donor <b>1a</b>                                  | S5  |
| Synthesis of compound <b>S2</b>                               | S6  |
| Synthesis of donor <b>1b</b>                                  | S6  |
| Synthesis of compound <b>S4</b>                               | S7  |
| Synthesis of donor <b>1c</b>                                  | S7  |
| Synthesis of compound <b>S5</b>                               | S8  |
| Synthesis of compound <b>S6</b>                               | S8  |
| Synthesis of compound <b>S7</b>                               | S9  |
| Synthesis of donor <b>1d</b>                                  | S9  |
| Synthesis of compound <b>5a</b>                               | S9  |
| Synthesis of donor <b>2u</b>                                  | S10 |
| <b>Section 2. Optimization of reaction conditions.</b>        | S10 |
| Supplementary Table 1. Condition screening                    | S11 |
| General procedure for the reaction development                | S11 |
| <b>Section 3. Allylic rearrangement with 1a as the donor.</b> | S12 |
| Synthesis of compound <b>3a</b>                               | S13 |
| Synthesis of compound <b>3b</b>                               | S13 |
| Synthesis of compound <b>3c</b>                               | S13 |
| Synthesis of compound <b>3d</b>                               | S13 |
| Synthesis of compound <b>3e</b>                               | S13 |
| Synthesis of compound <b>3f</b>                               | S13 |
| Synthesis of compound <b>3g</b>                               | S14 |
| Synthesis of compound <b>3h</b>                               | S14 |

|                                                                 |        |
|-----------------------------------------------------------------|--------|
| Synthesis of compound <b>3i</b>                                 | S15    |
| Synthesis of compound <b>3j</b>                                 | S15    |
| Synthesis of compound <b>3k</b>                                 | S15    |
| Synthesis of compound <b>3l</b>                                 | S16    |
| Synthesis of compound <b>3m</b>                                 | S16    |
| Synthesis of compound <b>3n</b>                                 | S17    |
| Synthesis of compound <b>3o</b>                                 | S17    |
| Synthesis of compound <b>3p</b>                                 | S18    |
| Synthesis of compound <b>3q</b>                                 | S18    |
| Synthesis of compound <b>3r</b>                                 | S18    |
| Synthesis of compound <b>3s</b>                                 | S19    |
| Synthesis of compound <b>3t</b>                                 | S19    |
| Synthesis of compound <b>3u</b>                                 | S20    |
| <b>Section 4. Allylic rearrangement with 1b–d as the donor.</b> | S20    |
| Synthesis of compound <b>3ba</b>                                | S20    |
| Synthesis of compound <b>3bb</b>                                | S21    |
| Synthesis of compound <b>3bc</b>                                | S21    |
| Synthesis of compound <b>3ca</b>                                | S22    |
| Synthesis of compound <b>3cb</b>                                | S22    |
| Synthesis of compound <b>3cc</b>                                | S22    |
| Synthesis of compound <b>3da</b>                                | S23    |
| Synthesis of compound <b>3db</b>                                | S23    |
| Synthesis of compound <b>3dc</b>                                | S23    |
| <b>Section 5. Application of allylic rearrangement.</b>         | S24    |
| Synthesis of compound <b>7</b>                                  | S24    |
| <b>Section 6. Computational details.</b>                        | S24    |
| General computational methods                                   | S24    |
| Calculated coordinates and energies of the optimized structures | S25–65 |
| <b>Supplementary References</b>                                 | S66–67 |
| <b>NMR Spectra</b>                                              | S68    |
| <sup>1</sup> H spectrum for <b>S1</b>                           | S68    |
| <sup>1</sup> H spectrum for <b>S7</b>                           | S68    |
| <sup>1</sup> H spectrum for <b>5a</b>                           | S69    |
| <sup>1</sup> H and <sup>13</sup> C spectra for <b>1a</b>        | S69    |
| <sup>1</sup> H and <sup>13</sup> C spectra for <b>1b</b>        | S70    |
| <sup>1</sup> H and <sup>13</sup> C spectra for <b>1c</b>        | S71    |
| <sup>1</sup> H and <sup>13</sup> C spectra for <b>1d</b>        | S72    |
| <sup>1</sup> H and <sup>13</sup> C spectra for <b>2u</b>        | S73    |
| <sup>1</sup> H spectrum for <b>4a</b>                           | S74    |
| <sup>1</sup> H spectrum for <b>3a</b>                           | S75    |
| <sup>1</sup> H spectrum for <b>3b</b>                           | S75    |
| <sup>1</sup> H spectrum for <b>3c</b>                           | S76    |
| <sup>1</sup> H spectrum for <b>3d</b>                           | S76    |
| <sup>1</sup> H and <sup>13</sup> C spectra for <b>3e</b>        | S77    |
| <sup>1</sup> H spectrum for <b>3f</b>                           | S78    |
| <sup>1</sup> H spectrum for <b>3g</b>                           | S78    |
| <sup>1</sup> H and <sup>13</sup> C spectra for <b>3h</b>        | S79    |
| <sup>1</sup> H and <sup>13</sup> C spectra for <b>3i</b>        | S80    |

|                                                           |     |
|-----------------------------------------------------------|-----|
| <sup>1</sup> H and <sup>13</sup> C spectra for <b>3j</b>  | S81 |
| <sup>1</sup> H and <sup>13</sup> C spectra for <b>3k</b>  | S82 |
| <sup>1</sup> H and <sup>13</sup> C spectra for <b>3l</b>  | S83 |
| <sup>1</sup> H spectrum for <b>3m</b>                     | S84 |
| <sup>1</sup> H and <sup>13</sup> C spectra for <b>3n</b>  | S84 |
| <sup>1</sup> H and <sup>13</sup> C spectra for <b>3o</b>  | S85 |
| <sup>1</sup> H and <sup>13</sup> C spectra for <b>3p</b>  | S86 |
| <sup>1</sup> H spectrum for <b>3q</b>                     | S87 |
| <sup>1</sup> H and <sup>13</sup> C spectra for <b>3r</b>  | S88 |
| <sup>1</sup> H and <sup>13</sup> C spectra for <b>3s</b>  | S89 |
| <sup>1</sup> H spectrum for <b>3t</b>                     | S90 |
| <sup>1</sup> H spectrum for <b>3u</b>                     | S90 |
| <sup>1</sup> H and <sup>13</sup> C spectra for <b>3ba</b> | S91 |
| <sup>1</sup> H and <sup>13</sup> C spectra for <b>3bb</b> | S92 |
| <sup>1</sup> H and <sup>13</sup> C spectra for <b>3bc</b> | S93 |
| <sup>1</sup> H spectrum for <b>3ca</b>                    | S94 |
| <sup>1</sup> H spectrum for <b>3cb</b>                    | S94 |
| <sup>1</sup> H spectrum for <b>3cc</b>                    | S95 |
| <sup>1</sup> H spectrum for <b>3da</b>                    | S95 |
| <sup>1</sup> H and <sup>13</sup> C spectra for <b>3db</b> | S96 |
| <sup>1</sup> H and <sup>13</sup> C spectra for <b>3bc</b> | S97 |
| <sup>1</sup> H and <sup>13</sup> C spectra for <b>7</b>   | S98 |

## Supplementary Note

All reactions were carried out under a nitrogen atmosphere with magnetic stirring unless otherwise indicated. All commercially obtained reagents were used as received, except where specified otherwise.  $\text{Cu}(\text{OTf})_2$ ,  $\text{Fe}(\text{OTf})_3$ , and  $\text{Sc}(\text{OTf})_3$  were purchased from Alfa and used without further purification. Tetrahydrofuran (THF) and toluene were distilled immediately before use from sodium-benzophenone ketyl. Dichloromethane ( $\text{CH}_2\text{Cl}_2$ ), pyridine, and acetonitrile were refluxed over calcium hydride and distilled before use. Anhydrous *N,N*-dimethylformamide (DMF), and diethyl ether ( $\text{Et}_2\text{O}$ ) were purchased from Sigma-Aldrich and used without further purification. Flash column chromatography was performed on Silica Gel 60 (Merck Co.). Analytical thin-layer chromatography was performed on Silicycle SiliaPlate glass-backed plates coated with silica gel (60 mesh pore size, F-254 indicator) and visualized by exposure to ultraviolet light and/or staining with 5% sulfuric acid in ethanol. Optical rotations were determined with a JASCO P-1020 digital polarimeter. All NMR spectra were recorded with Bruker BBFO-400 (400 MHz) or Bruker AV-500 (500 MHz) NMR spectrometers at ambient temperature using  $\text{CDCl}_3$  or  $\text{CD}_2\text{Cl}_2$  as solvents. The NMR spectra were calibrated by using residual undeuterated chloroform ( $\delta_{\text{H}} = 7.26$  ppm),  $\text{CDCl}_3$  ( $\delta_{\text{C}} = 77.16$  ppm), residual undeuterated dichloromethane ( $\delta_{\text{H}} = 5.32$  ppm), and  $\text{CD}_2\text{Cl}_2$  ( $\delta_{\text{C}} = 53.84$  ppm) as internal references. The following abbreviations are used to designate multiplicities: s = singlet, d = doublet, t = triplet, m = multiplet, brs = broad singlet.

## Supplementary Methods

### Section 1. Synthesis of glycal donors.

#### 4,6-Di-*O*-acetyl-D-glucal (**S1**)

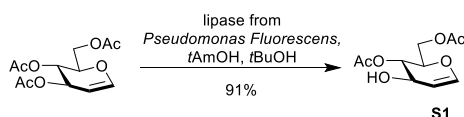

Supporting information Fig. 1 | Synthesis of **S1**

3,4,6-Tri-*O*-acetyl-D-glucal (1.5 g, 5.6 mmol, 1.0 equiv), lipase from *Pseudomonas fluorescens* (961 mg), 2-methyl-2-butanol (*t*AmOH, 15 mL) and *tert*-Butanol (*t*BuOH, 1.5 mL, 16.2 mmol) were added into a sealed tube. The mixture was stirred for 22 h at 40 °C. After raw material was consumed (determined by thin layer chromatography (TLC), the sealed tube was allowed to cool to room temperature. Then the mixture was filtered through a Büchner funnel and washed with 30 mL of chloroform. Solvents were evaporated under reduced pressure and the crude product was purified by silica gel column chromatography (hexane:EtOAc = 2:1) to obtain **S1** (1.2 g, 5.2 mmol, 91%) as a colorless oil. <sup>1</sup>H NMR (500 MHz, CDCl<sub>3</sub>) δ 6.40 (dd, *J* = 6.1, 1.5 Hz, 1H), 4.97 (dd, *J* = 8.9, 6.3 Hz, 1H), 4.86 (dd, *J* = 6.1, 2.8 Hz, 1H), 4.40 (dd, *J* = 12.3, 5.4 Hz, 1H), 4.33 – 4.31 (m, 1H), 4.24 (dd, *J* = 12.3, 2.5 Hz, 1H), 4.14 – 4.10 (m, 1H), 2.57 (brs, 1H), 2.13 (s, 3H), 2.09 (s, 3H). The data are identical to the literature.<sup>1</sup>

#### 3-*O*-ortho-2,2-Dimethoxycarbonylcyclopropylbenzoyl-4,6-di-*O*-acetyl-D-glucal (**1a**)

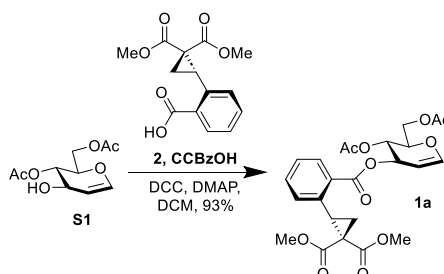

Supporting information Fig. 2 | Synthesis of **1a**

To a solution of **S1** (370 mg, 1.6 mmol, 1.0 equiv) and CCBzOH<sup>2</sup> (537 mg, 1.9 mmol, 1.2 equiv) in anhydrous dichloromethane (DCM, 8.0 mL, 0.2 M) were added sequentially *N,N'*-dicyclohexylcarbodiimide (DCC, 497 mg, 2.4 mmol, 1.5 equiv) and 4-dimethylaminopyridine (DMAP, 98 mg, 0.8 mmol, 0.5 equiv). The mixture was stirred for 10 h at room temperature. The resulting mixture was filtered and washed with cold EtOAc, the organic layer was concentrated *in vacuo*. The crude product was purified by silica gel column chromatography (toluene:EtOAc = 6:1) to afford **1a** as a colorless syrup (735 mg, 1.49 mmol, 93%, dr = 1:0.85). <sup>1</sup>H NMR (400 MHz, CDCl<sub>3</sub>) δ 7.92 (dd, *J* = 7.8, 1.5 Hz, 1H), 7.82 (dd, *J* = 7.8, 1.5 Hz, 0.9H), 7.46 – 7.41 (m, 2H), 7.34 – 7.29 (m, 2H), 7.23 (d, *J* = 7.7 Hz, 2H), 6.51 – 6.47 (m, 2H), 5.60 – 5.57 (m, 1.9H), 5.45 – 5.42 (m, 1.9H), 5.06 – 5.00 (m, 1.9H), 4.49 – 4.43 (m, 2H), 4.31 – 4.21 (m, 4H), 3.88 – 3.83 (m, 2H), 3.80 (s, 2.3H), 3.79 (s, 3H), 3.25 (s, 2.5H), 3.23 (s, 3H), 2.21 – 2.16 (m, 2H), 2.09 (s, 5.4H), 2.08 (s, 2.8H), 2.05 (s, 3H), 1.85 – 1.78 (m, 2H); <sup>13</sup>C NMR (100 MHz, CDCl<sub>3</sub>) δ 170.7,

170.6, 170.3, 170.1, 169.6, 169.5, 167.2, 167.1, 166.1, 165.7, 145.5, 145.4, 136.7, 136.4, 132.32, 132.25, 131.0, 130.9, 130.8, 130.3, 129.7, 129.5, 127.8, 127.7, 99.5, 99.3, 74.3, 74.2, 68.9, 68.8, 67.0, 66.7, 61.6, 61.5, 52.71, 52.65, 52.2, 52.0, 36.3, 35.8, 32.7, 32.4, 20.9, 20.8, 20.7, 19.9, 19.7; HRMS (ESI)  $m/z$  Calcd for  $C_{24}H_{26}O_{11}Na$   $[M + Na]^+$  513.1373, found 513.1390.

#### 4,6-*O*-Di-(*tert*-butyl)silanediy-D-glucal (**S2**)

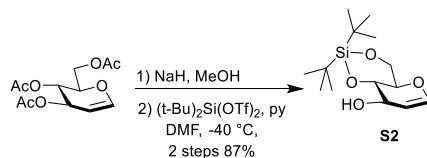

Supporting information Fig. 3 | Synthesis of **S2**

To a solution of 3,4,6-Tri-*O*-acetyl-D-glucal (6.0 g, 22.2 mmol, 1.0 equiv) in MeOH (45 mL, 0.5 M) was added NaH (60% dispersion in mineral oil, 438 mg, 11.1 mmol, 0.5 equiv). The mixture was stirred at 0 °C until all starting material was consumed. The reaction was then quenched with AcOH and pH was adjusted to 7. The mixture was diluted in MeOH, filtered, and concentrated *in vacuo*. The crude product without purification was dissolved in anhydrous dimethylformamide (DMF, 75 mL, 0.27 M) under an N<sub>2</sub> atmosphere, and cooled to -45 °C. Then, under constant stirring, di-*tert*-butylsilyl ditriflate ((*t*Bu)<sub>2</sub>Si(OTf)<sub>2</sub>, 4.7 mL, 14.4 mmol, 0.7 equiv) was added to the reaction mixture dropwise over 15 min. Stirring was continued for 45 min at -45 °C after which pyridine was added and it was allowed to warm to 0 °C. After 30 min at 0 °C, the reaction was quenched by NaHCO<sub>3</sub> (sat.) and diluted with EtOAc (300 mL). The organic phase was washed with brine (3 x 150 mL), dried over Na<sub>2</sub>SO<sub>4</sub>, then filtered and concentrated *in vacuo*. The residue was purified by silica gel column chromatography (hexane:EtOAc = 9:1) to obtain **S2** (5.5 g, 19.2 mmol, 87% for two steps) as a white solid. <sup>1</sup>H NMR (400 MHz, CDCl<sub>3</sub>) δ 6.29 – 6.23 (m, 1H), 4.76 (dd, *J* = 6.1, 1.9 Hz, 1H), 4.30 (d, *J* = 6.8 Hz, 1H), 4.18 (dd, *J* = 10.3, 5.0 Hz, 1H), 3.96 (t, *J* = 10.2 Hz, 1H), 3.92 (dd, *J* = 10.2, 7.2 Hz, 1H), 3.87 – 3.81 (m, 1H), 2.44 (brs, 1H), 1.07 (s, 9H), 0.99 (s, 9H). The data are identical to the literature.<sup>3</sup>

#### 3-*O*-ortho-2,2-Dimethoxycarbonylcyclopropylbenzoyl-4,6-*O*-(di-*tert*-butyl)silanediy-D-glucal (**1b**)

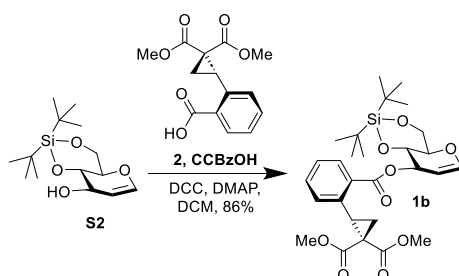

Supporting information Fig. 4 | Synthesis of **1b**

Following the procedure for **1a**, **S2** (1.7 g, 5.9 mmol, 1.0 equiv) was transformed into **1b** (2.8 g, 5.07 mmol, 86%, dr = 1:1) as a colorless oil after purification by silica gel column chromatography (toluene:EtOAc = 20:1). <sup>1</sup>H NMR (400 MHz, CDCl<sub>3</sub>) δ 8.03 (dd, *J* = 7.8, 1.5 Hz, 1H), 7.90 (dd, *J* = 7.7, 1.5 Hz, 1H), 7.47 – 7.43 (m, 2H), 7.36 (t, *J* = 7.0 Hz, 2H), 7.29 – 7.24 (m, 3H), 6.39 – 6.34 (m, 2H), 5.58 – 5.52 (m, 2H), 5.01 – 4.97 (m, 2H), 4.44 – 4.34 (m, 2H), 4.27 – 4.19 (m, 2H), 4.08 – 3.88 (m, 5H), 3.81 (s, 4H), 3.75 (s, 3H),

3.29 (d,  $J = 6.4$  Hz, 6H), 2.21 – 2.17 (m, 2H), 1.89 – 1.77 (m, 2H), 1.09 (s, 9H), 1.06 (s, 9H), 0.99 (s, 18H);  $^{13}\text{C}$  NMR (100 MHz,  $\text{CDCl}_3$ )  $\delta$  170.2, 167.3, 167.2, 167.1, 166.5, 144.8, 144.6, 136.6, 135.9, 132.1, 131.92, 131.2, 130.1, 129.9, 129.5, 127.7, 127.6, 100.60, 100.56, 73.8, 73.5, 73.0, 72.9, 72.9, 65.89, 65.86, 52.7, 52.6, 52.17, 52.15, 36.3, 35.8, 32.8, 32.4, 29.7, 27.4, 26.7, 22.7, 22.6, 20.0, 19.87, 19.85, 19.7; HRMS (ESI)  $m/z$  Calcd for  $\text{C}_{28}\text{H}_{38}\text{O}_9\text{SiNa}$   $[\text{M} + \text{Na}]^+$  569.2183, found 569.2209.

**Tips:** Glucal donors are usually straightforward to separate with toluene and EtOAc eluent. Otherwise, if the product is hard to separate from the unreacted substrate, a tiny quantity of  $\text{Ac}_2\text{O}$  can help acetylate the unreacted glucal. Small adjustments to the typical procedure make silica gel column chromatography with toluene and EtOAc eluent easier to remove anomeric acetate.

#### 4,6-Di-*O*-acetyl-D-galactal (**S4**)

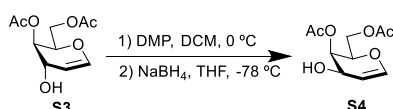

Supporting information Fig. 5 | Synthesis of **S4**

Compound **S3**<sup>4</sup> (200 mg, 0.9 mmol, 1.0 equiv) was dissolved in distilled DCM (4.4 mL) and then the system was cooled to 0 °C. Then Dess-Martin periodinane (DMP, 444 mg, 1.0 mmol, 1.2 equiv) was added into the system and the reaction was stirred at the same temperature for 1 h. Then sat.  $\text{NaHCO}_3$  was used to quench the reaction. The system was diluted in DCM, extracted by DCM, and washed with  $\text{H}_2\text{O}$ . The combined organic layers were concentrated *in vacuo* and dried with toluene three times to get the yellow oil without further purification. Then to a solution of oil in distilled THF (4.4 mL) at -78 °C was added  $\text{NaBH}_4$  (36 mg, 1.0 mmol, 1.1 equiv). The reaction was stirred at -78 °C for 1.5 h. After raw material was consumed (determined by TLC), the system was warmed to 0 °C and sat.  $\text{NH}_4\text{Cl}$  was added to quench the reaction. Extract the system by DCM and the organic layers were concentrated *in vacuo*. The residue was purified by silica gel column chromatography (hexane:EtOAc = 2:1) to obtain **S4** (162 mg, 0.73 mmol, 2 steps 81%) as a white solid.  $^1\text{H}$  NMR (500 MHz,  $\text{CDCl}_3$ ) 6.38 (dd,  $J = 6.2, 1.6$  Hz, 1H), 5.50 – 5.48 (m, 1H), 4.90 – 4.88 (m, 1H), 4.60 – 4.58 (m, 2H), 4.30 – 4.12 (m, 2H), 2.12 (s, 3H), 2.04 (s, 3H). The data are identical to the literature.<sup>5</sup>

#### 3-*O*-ortho-2,2-Dimethoxycarbonylcyclopropylbenzoyl-4,6-di-*O*-acetyl-D-galactal (**1c**)

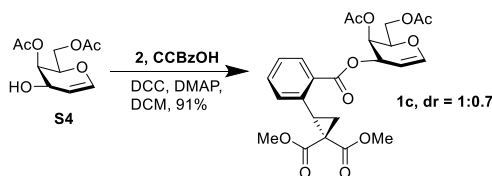

Supporting information Fig. 6 | Synthesis of **1c**

Following the procedure for **1a**, **S4** (160 mg, 0.7 mmol, 1.0 equiv) was transformed into **1c** (310 mg, 0.64 mmol, 91%, dr = 1:0.7) as a colorless syrup after purification by silica gel column chromatography (toluene:EtOAc = 4:1).  $^1\text{H}$  NMR (400 MHz,  $\text{CDCl}_3$ )  $\delta$  7.85 (dd,  $J = 7.8, 1.5$  Hz, 0.7H), 7.77 (dd,  $J = 7.9, 1.5$  Hz, 1H), 7.46 – 7.42 (m, 1.9H), 7.35 – 7.29 (m, 1.9H), 7.24 – 7.21 (m, 1.9H), 6.51 – 6.47 (m, 1.8H), 5.80 – 5.74 (m, 1.7H), 5.60 – 5.56 (m, 1.9H), 4.95 – 4.90 (m, 1.7H), 4.41 – 4.37 (m, 1.7H), 4.35 – 4.23 (m,

3.7H), 3.90 – 3.80 (m, 1H), 3.80 (s, 3H), 3.79 (s, 2H), 3.73 – 3.67 (m, 1H), 3.29 (s, 2H), 3.27 (s, 3H), 2.21 – 2.15 (m, 2.5H), 2.12 (s, 2H), 2.09 (s, 8H), 1.84 (dd,  $J = 9.0, 5.1$  Hz, 1.2H), 1.80 (dd,  $J = 9.0, 5.1$  Hz, 1H);  $^{13}\text{C}$  NMR (100 MHz,  $\text{CDCl}_3$ )  $\delta$  170.7, 170.6, 170.2, 170.1, 170.0, 167.2, 167.1, 165.8, 165.4, 145.32, 145.25, 136.8, 136.1, 132.2, 131.0, 130.9, 130.8, 130.0, 129.5, 129.4, 127.7, 127.6, 99.2, 99.1, 73.1, 72.9, 64.70, 64.66, 64.1, 64.0, 62.2, 62.1, 52.7, 52.2, 52.1, 36.5, 36.0, 32.6, 32.3, 20.8, 20.71, 20.65, 19.7; HRMS (ESI)  $m/z$  Calcd for  $\text{C}_{24}\text{H}_{26}\text{O}_{11}\text{Na}$   $[\text{M} + \text{Na}]^+$  513.1373, found 513.1390.

### 3-*O*-(*tert*-Butyldimethylsilyl)-L-rhamal (**S5**)

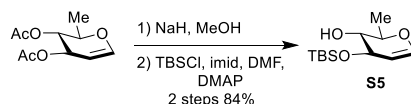

Supporting information Fig. 7 | Synthesis of **S5**

To a solution of 3,4-Di-*O*-acetyl-L-rhamal (1.0 g, 4.7 mmol, 1.0 equiv) in MeOH (20 mL, 0.2 M) was added NaH (60% dispersion in mineral oil, 93 mg, 2.3 mmol, 0.5 equiv). The mixture was stirred at room temperature until all starting material was consumed (determined by TLC, typically 1.5 h). The reaction was then quenched with AcOH, pH was adjusted to 7. The mixture was filtered and concentrated *in vacuo* to afford white solid without further purification. To a solution of solid in anhydrous DMF (8 mL, 0.6 M) was added imidazole (imid, 478 mg, 7.0 mmol, 1.5 equiv) and DMAP (57.2 mg, 0.5 mmol, 0.1 equiv) under an  $\text{N}_2$  atmosphere at 0 °C. Then *tert*-butyldimethylsilyl chloride (777 mg, 5.1 mmol, 1.1 equiv) was added in batches at the same temperature. The resulting mixture was slowly warmed up to room temperature and stirred for 10 h. TLC showed complete consumption of the starting material. The reaction mixture was diluted with water and extracted three times with diethyl ether. The combined organic layers were washed with water and brine, and then dried over  $\text{Na}_2\text{SO}_4$ , filtered, and concentrated *in vacuo*. The crude silyl ether product was purified by silica gel column chromatography (hexane:EtOAc = 5:1) to obtain **S5** (952 mg, 3.9 mmol, 84% for two steps) as a white solid.  $^1\text{H}$  NMR (400 MHz,  $\text{CDCl}_3$ )  $\delta$  6.24 (dd,  $J = 6.0, 1.3$  Hz, 1H), 4.60 (dd,  $J = 6.0, 2.2$  Hz, 1H), 4.21 – 4.17 (m, 1H), 3.81–3.98 (m, 1H), 3.53 – 3.63 (m, 1H), 1.36 (d,  $J = 6.4$  Hz, 3H), 0.89 (s, 9H), 0.10 (s, 6H). The data are identical to the literature.<sup>6</sup>

### 3-*O*-(*tert*-Butyldimethylsilyl)-4-*O*-acetyl-L-rhamal (**S6**)

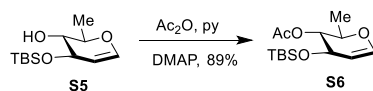

Supporting information Fig. 8 | Synthesis of **S6**

To a solution of **S5** (952 mg, 3.9 mmol, 1.0 equiv) in anhydrous pyridine (19 mL, 0.2 M) was added  $\text{Ac}_2\text{O}$  (0.6 mL, 5.8 mmol, 1.5 equiv) and DMAP (48 mg, 0.4 mmol, 0.1 equiv) at room temperature under  $\text{N}_2$  atmosphere, and the solution was kept stirring overnight. TLC (hexane:EtOAc = 8:1) showed complete consumption of the starting material. The solution was evaporated under reduced pressure. The resulting syrup was dissolved in EtOAc, and washed sequentially with water, 1N HCl solution, sat.  $\text{NaHCO}_3$  and brine. The organic layer was dried over  $\text{Na}_2\text{SO}_4$ , filtered, and concentrated *in vacuo*. The residue was purified by silica gel column chromatography (hexane:EtOAc = 8:1) to provide **S6** (1.0 g, 3.47 mmol, 88%) as a colorless syrup.  $^1\text{H}$  NMR (400 MHz,  $\text{CDCl}_3$ )  $\delta$  6.30 (dd,  $J = 6.1, 1.4$  Hz, 1H), 4.91 (dd,  $J = 8.1, 6.1$  Hz,



1H), 4.67 (dd,  $J = 6.2, 2.8\text{Hz}$ , 1H), 4.29 – 4.24 (m, 1H), 4.05 – 3.97 (m, 1H), 2.10 (s, 3H), 1.29 (d,  $J = 6.5\text{ Hz}$ , 3H), 0.87 (s, 9H), 0.08 (s, 3H), 0.06 (s, 3H). The data are identical to the literature.<sup>7</sup>

#### 4-*O*-Acetyl-L-rhamal (**S7**)

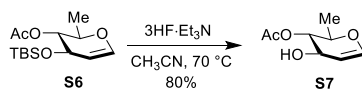

Supporting information Fig. 9 | Synthesis of **S7**

To a solution of **S6** (1.0 g, 3.5 mmol, 1.0 equiv) in  $\text{CH}_3\text{CN}$  (37 mL, 0.093 M) at 70 °C,  $3\text{HF}\cdot\text{Et}_3\text{N}$  (1.2 mL, 7.0 mmol, 2.0 equiv) was added under an  $\text{N}_2$  atmosphere. After stirring at this temperature for 10 h (determined by TLC), the reaction was quenched by adding sat.  $\text{NaHCO}_3$  and extracted with EtOAc. The combined organic layer was washed with saturated  $\text{NaHCO}_3$  solution and brine, dried over  $\text{Na}_2\text{SO}_4$ , filtered, and evaporated *in vacuo*. The residue was purified by silica gel column chromatography (hexane:EtOAc = 4:1) to provide **S7** (480 mg, 2.80 mmol, 80%) as a colorless syrup.  $^1\text{H}$  NMR (400 MHz,  $\text{CDCl}_3$ )  $\delta$  6.36 (dd,  $J = 6.1, 1.6\text{ Hz}$ , 1H), 4.82 – 4.72 (m, 2H), 4.30 – 4.27 (m, 1H), 4.01 – 3.94 (m, 1H), 2.51 (s, 1H), 2.14 (s, 3H), 1.30 (d,  $J = 6.4\text{ Hz}$ , 3H). The data are identical to the literature.<sup>7</sup>

#### 3-*O*-ortho-2,2-Dimethoxycarbonylcyclopropylbenzoyl-4-*O*-acetyl-L-rhamal (**1d**)

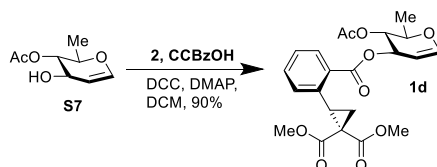

Supporting information Fig. 10 | Synthesis of **1d**

Following the procedure for **1a**, **S7** (200 mg, 1.0 mmol, 1.0 equiv) was transformed into **1d** (450 mg, 0.90 mmol, 90%, dr = 1:1) as a colorless syrup after purification by silica gel column chromatography (toluene:EtOAc = 8:1).  $^1\text{H}$  NMR (400 MHz,  $\text{CDCl}_3$ )  $\delta$  7.94 (dd,  $J = 7.8, 1.5\text{ Hz}$ , 1H), 7.83 (dd,  $J = 7.8, 1.5\text{ Hz}$ , 1H), 7.47 – 7.42 (m, 2H), 7.35 – 7.30 (m, 2H), 7.26 – 7.21 (m, 2H), 6.49 – 6.45 (m, 2H), 5.61 – 5.54 (m, 2H), 5.29 – 5.22 (m, 2H), 5.02 – 4.96 (m, 2H), 4.21 – 4.11 (m, 2H), 3.90 – 3.84 (m, 2H), 3.82 (s, 3H), 3.80 (s, 3H), 3.27 (s, 6H), 3.26 (s, 3H), 2.22 – 2.18 (m, 2H), 2.10 (s, 3H), 2.07 (s, 3H), 1.87 – 1.76 (m, 3H), 1.36 (dd,  $J = 6.5, 3.4\text{ Hz}$ , 6H);  $^{13}\text{C}$  NMR (100 MHz,  $\text{CDCl}_3$ )  $\delta$  170.3, 170.0, 169.93, 169.85, 167.2, 167.1, 166.3, 165.9, 145.82, 145.79, 136.6, 136.3, 132.2, 132.11, 131.2, 131.12, 131.06, 130.3, 129.6, 129.5, 127.7, 127.6, 99.1, 72.7, 72.6, 71.7, 71.5, 69.6, 69.3, 52.7, 52.65, 52.2, 52.0, 36.4, 35.7, 32.7, 32.3, 20.93, 20.86, 19.8, 19.7, 16.74, 16.72; HRMS (ESI)  $m/z$  Calcd  $\text{C}_{24}\text{H}_{26}\text{O}_{11}\text{Na}$   $[\text{M}+\text{Na}]^+$  455.1318, found 455.1311.

#### 3-*O*-Benzylated-4,6-di-*O*-acetyl-D-glucal (**5a**)

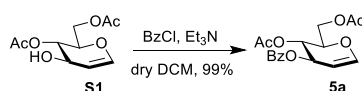

Supporting information Fig. 11 | Synthesis of **5a**

Compound **S1** (100 mg, 0.4 mmol, 1.0 equiv) and triethylamine (90  $\mu\text{L}$ , 0.7 mmol, 1.5 equiv) were dissolved in anhydrous DCM (1 mL, 0.5 M) at 0 °C. At this temperature, benzoyl chloride ( $\text{BzCl}$ , 75  $\mu\text{L}$ , 0.7 mmol, 1.5 equiv) was added dropwise and the mixture was stirred for 10 h at room temperature. TLC

showed complete consumption of the starting material. After dilution with DCM, the solution was washed with water, sat. NaHCO<sub>3</sub> and brine. The combined organic phase was dried by Na<sub>2</sub>SO<sub>4</sub>, filtered, and evaporated *in vacuo*. Purification by silica gel column chromatography (hexane:EtOAc = 3:1) afforded **5a** (142 mg, 0.4 mmol, 99%) as a white solid. <sup>1</sup>H NMR (400 MHz, CDCl<sub>3</sub>) δ 7.99 (dd, *J* = 7.0, 1.4 Hz, 2H), 7.58 – 7.52 (m, 1H), 7.46 – 7.40 (m, 2H), 6.50 (dd, *J* = 6.2, 1.4 Hz, 1H), 5.57 – 5.53 (m, 1H), 5.43 (dd, *J* = 7.6, 5.8 Hz, 1H), 4.99 (dd, *J* = 6.2, 3.2 Hz, 1H), 4.49 (dd, *J* = 12.1, 5.8 Hz, 1H), 4.37 – 4.31 (m, 1H), 4.25 (dd, *J* = 12.1, 3.2 Hz, 1H), 2.08 (s, 3H), 2.06 (s, 3H). The data are identical to the literature.<sup>8</sup>

### 3-*O*-ortho-2,2-Dimethoxycarbonylcyclopropylbenzoyl-4-*O*-acetyl-D-glucal (**2u**)

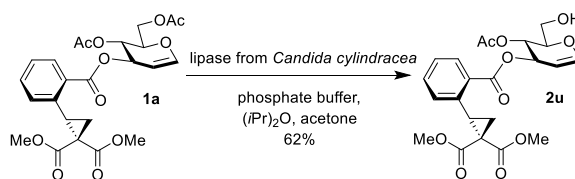

Supporting information Fig. 12 | Synthesis of **2u**

To a mixture of **1a** (230 mg, 0.5 mmol) in 0.1 M potassium phosphate buffer (5 mL, pH = 7), diisopropyl ether ((*i*Pr)<sub>2</sub>O, 1 mL, 0.6 M), acetone (0.6 mL) and lipase from *Candida cylindracea* (lipase CC, 75 mg) was added and this mixture was stirred at room temperature. TLC showed complete consumption of the starting material. After work-up, the mixture was filtered over celite and washed with EtOAc. The filtrate was extracted with EtOAc, and the combined organic layers were washed with brine and dried over Na<sub>2</sub>SO<sub>4</sub>. The solution was evaporated *in vacuo*. Purification by silica gel column chromatography (hexane:EtOAc = 2:1) obtained **2u** (130 mg, 0.3 mmol, 62%, dr = 10:7) as a colorless syrup. <sup>1</sup>H NMR (400 MHz, CDCl<sub>3</sub>) δ 7.92 (dd, *J* = 7.8, 1.5 Hz, 1H), 7.81 (dd, *J* = 7.8, 1.5 Hz, 0.7H), 7.46 – 7.41 (m, 1.9H), 7.34 – 7.29 (m, 1.9H), 7.23 (d, *J* = 7.7 Hz, 1.7H), 6.51 – 6.49 (m, 1.7H), 5.67 – 5.64 (m, 1.7H), 5.47 – 5.39 (m, 1.7H), 5.01 (dd, *J* = 6.1, 2.7 Hz, 0.7H), 4.96 (dd, *J* = 6.1, 2.8 Hz, 1H), 4.10 – 4.05 (m, 1.9H), 3.86 – 3.71 (m, 11H), 3.24 (s, 2H), 3.23 (s, 2.9H), 2.54 (brs, 1.6H), 2.20 – 2.15 (m, 2H), 2.10 (s, 2.1H), 2.07 (s, 3H), 1.84 – 1.77 (m, 1.9H); <sup>13</sup>C NMR (100 MHz, CDCl<sub>3</sub>) δ 170.52, 170.47, 170.3, 170.1, 167.2, 167.1, 166.2, 165.9, 145.7, 145.6, 136.6, 136.3, 132.3, 132.2, 131.03, 131.01, 130.3, 129.7, 129.5, 127.8, 127.7, 99.3, 99.1, 76.72, 76.66, 69.3, 69.2, 67.6, 67.3, 60.7, 60.6, 52.77, 52.75, 52.2, 52.0, 36.2, 35.9, 32.7, 32.3, 20.9, 20.86, 19.8, 19.7; HRMS (ESI) *m/z* Calcd C<sub>22</sub>H<sub>24</sub>O<sub>10</sub>Na [M+Na]<sup>+</sup> 471.1267, found 471.1266.

## Section 2. Optimization of reaction conditions.

### Supplementary Table 1 | Condition screening<sup>a</sup>

Table 1. Reaction optimization

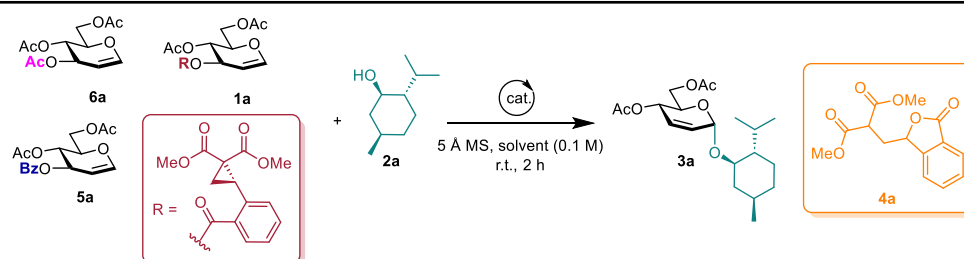

| Entry          | Donor     | Lewis acid           | Solvent            | MS  | Yields <sup>b</sup> % | Yield <sup>b</sup> of <b>4a</b> % | $\alpha$ : $\beta$ (selectivity) <sup>c</sup> |
|----------------|-----------|----------------------|--------------------|-----|-----------------------|-----------------------------------|-----------------------------------------------|
| 1              | <b>1a</b> | Sc(OTf) <sub>3</sub> | DCM                | 5 Å | 98                    | 95                                | 4:1                                           |
| 2              | <b>1a</b> | Cu(OTf) <sub>2</sub> | DCM                | 5 Å | 98                    | 95                                | 10:1                                          |
| 3              | <b>1a</b> | Fe(OTf) <sub>3</sub> | DCM                | 5 Å | 98                    | 95                                | 10:1                                          |
| 4 <sup>d</sup> | <b>1a</b> | Fe(OTf) <sub>3</sub> | DCM                | 5 Å | 53                    | 48                                | 10:1                                          |
| 5              | <b>1a</b> | Fe(OTf) <sub>2</sub> | DCM                | 5 Å | N.R.                  | 0                                 | N.D.                                          |
| 6              | <b>1a</b> | FeCl <sub>3</sub>    | DCM                | 5 Å | 6                     | trace                             | -                                             |
| 7              | <b>1a</b> | FeCl <sub>2</sub>    | DCM                | 5 Å | N.R.                  | 0                                 | N.D.                                          |
| 8              | <b>1a</b> | TMSOTf               | DCM                | 5 Å | N.R.                  | 0                                 | N.D.                                          |
| 9              | <b>1a</b> | TfOH                 | DCM                | 5 Å | N.R.                  | 0                                 | N.D.                                          |
| 10             | <b>1a</b> | Cu(OTf) <sub>2</sub> | DCE                | 5 Å | 98                    | 95                                | 10:1                                          |
| 11             | <b>1a</b> | Fe(OTf) <sub>3</sub> | DCE                | 5 Å | 98                    | 95                                | 10:1                                          |
| 12             | <b>1a</b> | Cu(OTf) <sub>2</sub> | Et <sub>2</sub> O  | 5 Å | 65                    | 52                                | 10:3                                          |
| 13             | <b>1a</b> | Fe(OTf) <sub>3</sub> | Toluene            | 5 Å | 12                    | trace                             | 10:1                                          |
| 14             | <b>1a</b> | Fe(OTf) <sub>3</sub> | CH <sub>3</sub> CN | 5 Å | N.R.                  | 0                                 | N.D.                                          |
| 15             | <b>5a</b> | Cu(OTf) <sub>2</sub> | DCM                | 5 Å | N.R.                  | 0                                 | N.D.                                          |
| 16             | <b>5a</b> | Fe(OTf) <sub>3</sub> | DCM                | 5 Å | N.R.                  | 0                                 | N.D.                                          |
| 17             | <b>6a</b> | Cu(OTf) <sub>2</sub> | DCM                | 5 Å | 74%                   | -                                 | 3:1                                           |
| 18             | <b>6a</b> | Fe(OTf) <sub>3</sub> | DCM                | 5 Å | 69%                   | -                                 | 3:1                                           |

<sup>a</sup>Unless otherwise noted, all reported yields are isolated and purified products. All reactions were carried out with **1a** or **5a** (0.1 mmol, 1.0 equiv), **2a** (1.2 equiv.), Lewis acid catalyst (0.1 equiv.) and 5 Å MS (50 mg) in corresponding solvent (1.0 ml, 0.1 M) under N<sub>2</sub> atmosphere for 2 h. MS = molecular sieve; DCE = 1,2-dichloroethane; ACN = acetonitrile; N.R. = no reaction; N.D. = no detective.

<sup>b</sup>Isolated yields.

<sup>c</sup>The  $\alpha$ / $\beta$  ratios were determined by <sup>1</sup>H NMR analysis.

<sup>d</sup>0.05 equiv of catalyst.

## General procedure for the reaction development

A solution of **1a** (50 mg, 0.1 mmol, 1.0 equiv) and L-menthol **2a** (19 mg, 0.12 mmol, 1.2 equiv) in anhydrous solvent (1 mL, 0.1 M) containing freshly activated 5 Å molecular sieve was stirred at room temperature for 15 min before the catalyst (0.01 mmol, 0.1 equiv) was added. The mixture was stirred at room temperature for 2 h – 20 h until **2a** was fully consumed (determined by TLC). The reaction was then quenched with triethylamine and the mixture was directly loaded onto silica gel by concentrating the mixture *in vacuo*. The residue was further purified by silica gel column chromatography (toluene:EtOAc = 8:1) obtained the **3a** as a colorless oil, followed by changing the eluent system (toluene:EtOAc = 6:1) to afford **4a** as a colorless oil.  $\alpha$  anomer of **3a**. <sup>1</sup>H NMR (400 MHz, CDCl<sub>3</sub>)  $\delta$  5.92 – 5.81 (m, 2H), 5.26 (dd,  $J$  = 9.1, 1.4 Hz, 1H), 5.10 (s, 1H), 4.24 – 4.13 (m, 3H), 3.44 – 3.73 (m, 1H), 2.20 – 2.15 (m, 1H), 2.09 (s, 3H), 2.06 (s, 3H), 1.67 – 1.60 (m, 3H), 1.45 – 1.37 (m, 1H), 1.09 – 0.78 (m, 13H), 0.76 (d,  $J$  = 7.0 Hz, 3H); <sup>13</sup>C NMR (100 MHz, CDCl<sub>3</sub>)  $\delta$  171.0, 170.4, 128.7, 128.2, 96.3, 81.2, 66.8, 65.5, 63.5, 49.0, 43.5, 34.4, 31.8, 25.7, 23.3, 22.5, 21.3, 21.1, 21.0, 16.3. The data are identical to the literature report.<sup>9</sup> **4a**: <sup>1</sup>H NMR (400 MHz, CDCl<sub>3</sub>)  $\delta$  7.82 (d,  $J$  = 7.7 Hz, 1H), 7.65 (t,  $J$  = 7.5 Hz, 1H), 7.53 – 7.43 (m, 2H), 5.50 (dd,  $J$  = 9.1, 3.2 Hz, 1H), 3.74 (s, 3H), 3.61 (s, 4H), 2.74 (ddd,  $J$  = 14.8, 9.4, 3.2 Hz, 1H), 2.14 (ddd,  $J$  = 14.4, 9.1, 5.0 Hz, 1H). The data are identical to the literature report.<sup>2</sup>

### Section 3. Allylic rearrangement with **1a** as the donor.

Acceptors **2a–d**, **2f–h**, **2j**, **2m**, **2o**, **2q**, **2s–t** were commercially available. Acceptors **2e**<sup>10</sup>, **2i**<sup>11</sup>, **2k** and **2l**<sup>12</sup>, **2n**<sup>13</sup>, **2p**<sup>14</sup>, and **2r**<sup>15</sup> were prepared according to the reported literatures.

#### L-Menthyl 4,6-di-*O*-acetyl-2,3-dideoxy- $\alpha$ -D-erythro-hex-2-enopyranoside (**3a**)

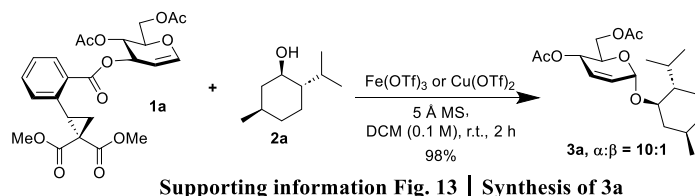

A solution of **1a** (50 mg, 0.1 mmol, 1.0 equiv) and L-menthol **2a** (19 mg, 0.12 mmol, 1.2 equiv) in anhydrous solvent (1 mL, 0.1 M) containing freshly activated 5 Å molecular sieve was stirred at room temperature for 15 min before Fe(OTf)<sub>3</sub> (5.0 mg, 0.01 mmol, 0.1 equiv) or Cu(OTf)<sub>2</sub> (3.7 mg, 0.01 mmol, 0.1 equiv) was added. The mixture was stirred at room temperature for 2 h until **2a** was fully consumed (determined by TLC). The reaction was then quenched with triethylamine and the mixture was directly loaded onto silica gel by concentrating the mixture *in vacuo*. The residue was further purified by silica gel column chromatography (toluene:EtOAc = 8:1) to give the **3a** as a colorless oil (37 mg, 0.098 mmol, 98%).

#### n-Butyl 4,6-di-*O*-acetyl-2,3-dideoxy- $\alpha$ -D-erythro-hex-2-enopyranoside (**3b**)

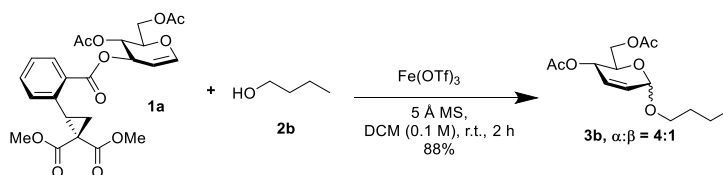

Following the procedure for **3a**, **2b** (11  $\mu$ L, 0.12 mmol, 1.2 equiv) was transformed into **3b** (29 mg, 0.088 mmol, 88%,  $\alpha$ : $\beta$  = 4:1) as a colorless oil after purification by silica gel column chromatography (hexane:EtOAc = 4:1).  $\alpha$  anomer: <sup>1</sup>H NMR (400 MHz, CDCl<sub>3</sub>)  $\delta$  5.89 – 5.80 (m, 2H), 5.31 – 5.28 (m, 1H), 5.03 – 5.00 (m, 1H), 4.26 – 4.21 (m, 1H), 4.17 (dd, *J* = 12.1, 2.5 Hz, 1H), 4.12 – 4.07 (m, 1H), 3.80 – 3.73 (m, 1H), 3.53 – 3.47 (m, 1H), 2.09 (s, 3H), 2.07 (s, 3H), 1.63 – 1.53 (m, 2H), 1.44 – 1.33 (m, 2H), 0.92 (t, *J* = 7.4 Hz, 3H). The data are identical to the literature report.<sup>16</sup>

#### 1-Adamantyl 4,6-di-*O*-acetyl-2,3-dideoxy- $\alpha$ -D-erythro-hex-2-enopyranoside (**3c**)

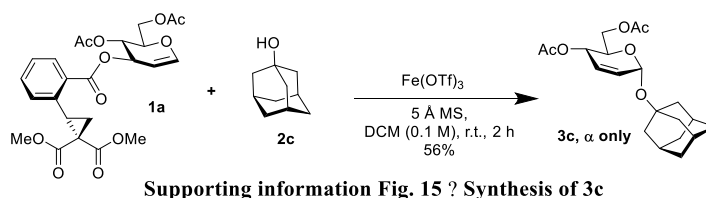

Following the procedure for **3a**, **2c** (19 mg, 0.12 mmol, 1.2 equiv) was transformed into **3c** (21 mg, 0.056 mmol, 56%,  $\alpha$  only) as a white solid after purification by silica gel column chromatography (hexane:EtOAc = 4:1). <sup>1</sup>H NMR (400 MHz, CDCl<sub>3</sub>)  $\delta$  5.84 (d, *J* = 10.2 Hz, 1H), 5.77 – 5.73 (m, 1H), 5.44 (t, *J* = 2.1 Hz, 1H), 5.27 (d, *J* = 9.2 Hz, 1H), 4.26 – 4.21 (m, 2H), 4.15 (d, *J* = 10.2 Hz, 1H), 2.15 (s, 3H),

2.08 (d,  $J = 6.0$  Hz, 6H), 1.86 (dd,  $J = 11.5, 7.7$  Hz, 6H), 1.68 – 1.57 (m, 6H). The data are identical to the literature report.<sup>9</sup>

### *para*-Methoxyphenyl 4,6-di-*O*-acetyl-2,3-dideoxy- $\alpha$ -D-erythro-hex-2-enopyranoside (**3d**)

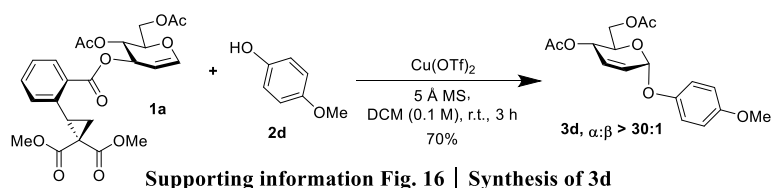

Following the procedure for **3a**, **2d** (15 mg, 0.12 mmol, 1.2 equiv) was transformed into **3d** (24 mg, 0.07 mmol, 70%,  $\alpha:\beta > 30:1$ ) as a white solid after purification by silica gel column chromatography (toluene:EtOAc = 4:1). When  $\text{Fe}(\text{OTf})_3$  as catalyst, the yield is 31 %, and  $\alpha:\beta > 30:1$   $^1\text{H}$  NMR (400 MHz,  $\text{CDCl}_3$ )  $\delta$  7.06 – 7.01 (m, 2H), 6.85 – 6.80 (m, 2H), 6.00 (d,  $J = 1.8$  Hz, 2H), 5.56 (d,  $J = 1.9$  Hz, 1H), 5.40 – 5.34 (m, 1H), 4.30 – 4.23 (m, 2H), 4.19 – 4.13 (m, 1H), 3.77 (s, 3H), 2.10 (s, 3H), 2.02 (s, 3H). The data are identical to the literature report.<sup>17</sup>

### Methyl *N*-(9H-fluorenylmethoxy)carbonyl-(4,6-di-*O*-acetyl-2,3-dideoxy- $\alpha$ -D-erythro-hex-2-enopyranosyl)-L-serine (**3e**)

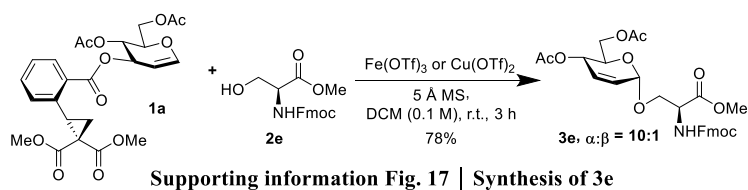

Following the procedure for **3a**, **2e** (42 mg, 0.12 mmol, 1.2 equiv) was transformed into **3e** (44 mg, 0.078 mmol, 78%,  $\alpha:\beta = 10:1$ ) as a foamy solid after purification by silica gel column chromatography (toluene:EtOAc = 4:1). When  $\text{Fe}(\text{OTf})_3$  as catalyst, the yield is 74%, and  $\alpha:\beta = 10:1$ .  $[\alpha]_{\text{D}}^{24} = +53.9$  ( $c = 1.0$ ,  $\text{CHCl}_3$ );  $^1\text{H}$  NMR (400 MHz,  $\text{CDCl}_3$ )  $\delta$  7.77 (d,  $J = 7.6$  Hz, 2H), 7.62 (t,  $J = 7.2$  Hz, 2H), 7.40 (t,  $J = 7.5$  Hz, 2H), 7.31 (t,  $J = 7.5$  Hz, 2H), 5.91 (t,  $J = 9.6$  Hz, 2H), 5.79 – 5.75 (m, 1H), 5.30 – 5.27 (m, 1H), 4.98 (s, 1H), 4.60 – 4.56 (m, 1H), 4.50 – 4.36 (m, 2H), 4.27 – 4.13 (m, 4H), 4.10 – 3.98 (m, 3H), 3.78 (s, 3H), 2.09 (d,  $J = 2.0$  Hz, 3H), 2.08 (s, 1H), 2.05 (s, 2H);  $^{13}\text{C}$  NMR (100 MHz,  $\text{CDCl}_3$ )  $\delta$  170.8, 170.5, 170.2, 156.0, 143.9, 143.7, 141.3, 129.6, 127.8, 127.1, 126.4, 125.1, 120.0, 95.3, 69.8, 67.4, 67.2, 65.1, 62.8, 54.5, 52.7, 47.1, 21.0, 20.7; HRMS (ESI)  $m/z$  Calcd  $\text{C}_{29}\text{H}_{31}\text{O}_{10}\text{NNa}$   $[\text{M}+\text{Na}]^+$  554.2026, found 554.2056.

### Pregnenolonyl 4,6-di-*O*-acetyl-2,3-dideoxy- $\alpha$ -D-erythro-hex-2-enopyranoside (**3f**)

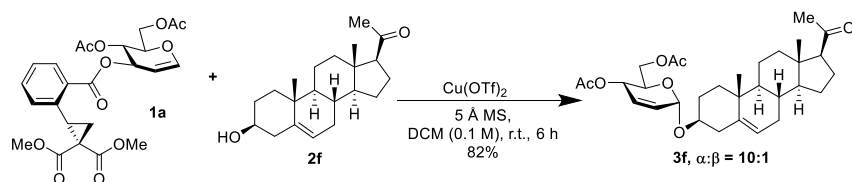

Following the procedure for **3a**, **2f** (40 mg, 0.12 mmol, 1.2 equiv) was transformed into **3f** (44 mg, 0.082 mmol, 82%,  $\alpha:\beta = 10:1$ ) as a white solid after purification by silica gel column chromatography

(toluene:EtOAc = 4:1).  $^1\text{H}$  NMR (400 MHz,  $\text{CDCl}_3$ )  $\delta$  5.90 – 5.85 (m, 1H), 5.84 – 5.80 (m, 1H), 5.36 (d,  $J$  = 3.9 Hz, 1H), 5.32 – 5.27 (m, 1H), 5.17 (s, 1H), 4.28 – 4.13 (m, 3H), 3.60 – 3.52 (m, 1H), 2.54 (d,  $J$  = 9.0 Hz, 1H), 2.45 – 2.25 (m, 3H), 2.12 (s, 3H), 2.09 (s, 3H), 2.08 (s, 3H), 2.05 – 1.96 (m, 2H), 1.94 – 1.83 (m, 3H), 1.72 – 1.41 (m, 17H), 1.32 – 1.11 (m, 10H), 1.06 – 0.80 (m, 8H), 0.63 (s, 3H). The data are identical to the literature report.<sup>18</sup>

### Cholesteryl 4,6-di-*O*-acetyl-2,3-dideoxy- $\alpha$ -D-erythro-hex-2-enopyranoside (**3g**)

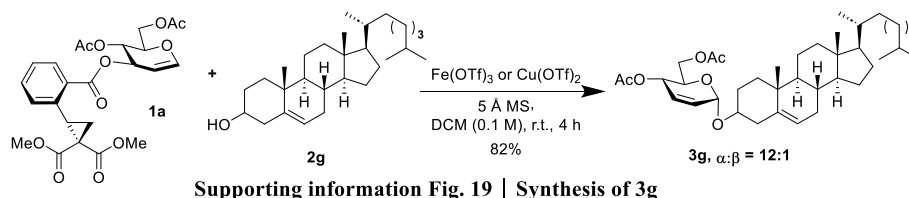

Following the procedure for **3a**, **2g** (47 mg, 0.12 mmol, 1.2 equiv) was transformed into **3g** (50 mg, 0.082 mmol, 82%,  $\alpha$ : $\beta$  = 12:1) as a white solid after purification by silica gel column chromatography (toluene:EtOAc = 4:1). When  $\text{Fe}(\text{OTf})_3$  as catalyst, the yield is 78%, and  $\alpha$ : $\beta$  = 12:1  $^1\text{H}$  NMR (400 MHz,  $\text{CDCl}_3$ )  $\delta$  5.87 (dd,  $J$  = 10.2, 1.6 Hz, 1H), 5.83 – 5.79 (m, 1H), 5.36 – 5.34 (m, 1H), 5.30 – 5.29 (m, 1H), 5.18 – 5.15 (m, 1H), 4.26 – 4.14 (m, 3H), 3.59 – 3.51 (m, 1H), 2.45 – 2.28 (m, 2H), 2.08 (d,  $J$  = 5.7 Hz, 6H), 2.03 – 1.92 (m, 2H), 1.91 – 1.77 (m, 3H), 1.67 – 1.21 (m, 15H), 1.20 – 0.96 (m, 14H), 0.94 – 0.83 (m, 12H), 0.67 (s, 3H). The data are identical to the literature report.<sup>19</sup>

### Diosgeninyl 4,6-di-*O*-acetyl-2,3-dideoxy- $\alpha$ -D-erythro-hex-2-enopyranoside (**3h**)

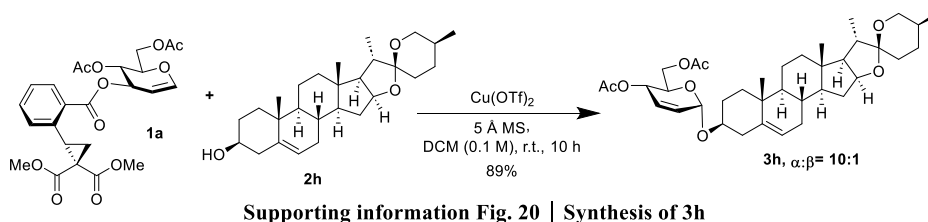

Following the procedure for **3a**, **2h** (51 mg, 0.12 mmol, 1.2 equiv) was transformed into **3h** (57 mg, 0.089 mmol, 89%,  $\alpha$ : $\beta$  = 10:1) as a foamy solid after purification by silica gel column chromatography (toluene:EtOAc = 6:1).  $[\alpha]_{\text{D}}^{25} = +0.8$  ( $c$  = 1.0,  $\text{CHCl}_3$ );  $^1\text{H}$  NMR (400 MHz,  $\text{CDCl}_3$ )  $\delta$  5.85 (dd,  $J$  = 10.3, 1.7 Hz, 1H), 5.81 – 5.78 (m, 1H), 5.35 – 5.32 (m, 1H), 5.30 – 5.24 (m, 1H), 5.17 – 5.12 (m, 1H), 4.42 – 4.36 (m, 1H), 4.27 – 4.13 (m, 3H), 3.59 – 3.50 (m, 1H), 3.47 – 3.43 (m, 1H), 3.35 (t,  $J$  = 10.9 Hz, 1H), 2.42 – 2.32 (m, 2H), 2.07 (d,  $J$  = 5.7 Hz, 6H), 2.02 – 1.93 (m, 2H), 1.88 – 1.81 (m, 3H), 1.78 – 1.37 (m, 15H), 1.34 – 0.84 (m, 17H), 0.77 – 0.76 (m, 6H);  $^{13}\text{C}$  NMR (100 MHz,  $\text{CDCl}_3$ )  $\delta$  170.8, 170.3, 140.8, 128.9, 128.4, 121.6, 109.3, 92.8, 80.8, 78.1, 67.1, 66.84, 65.4, 63.2, 62.1, 56.5, 50.1, 41.6, 40.4, 40.3, 39.8, 37.1, 36.8, 32.1, 31.8, 31.4, 31.38, 30.3, 28.8, 28.2, 21.0, 20.9, 20.8, 19.4, 17.1, 16.3, 14.5; HRMS (ESI)  $m/z$  Calcd  $\text{C}_{37}\text{H}_{55}\text{O}_8$   $[\text{M}+\text{H}]^+$  627.3897, found 627.3898.

**Gram-scale synthesis:** A solution of **1a** (990 mg, 2.0 mmol, 1.0 equiv) in anhydrous DCM (20 mL, 0.1 M) containing freshly activated 5 Å molecular sieve was stirred at room temperature for 15 min before  $\text{Cu}(\text{OTf})_2$  (73 mg, 0.2 mmol, 0.1 equiv) was added. The mixture was stirred at room temperature for 18h until **1a** was fully consumed (determined by TLC). The reaction was then quenched with triethylamine and

the mixture was directly loaded onto silica gel by concentrating the mixture *in vacuo*. The residue was further purified by silica gel column chromatography (toluene:EtOAc = 15:1) afforded the **3h** as a foamy solid (1.02 g, 1.62 mmol,  $\alpha:\beta = 10:1$ , 81%)

### 3-O-(4,6-di-O-acetyl-2,3-dideoxy- $\alpha$ -D-erythro-hex-2-enopyranosyl)-28-O-benzyl oleanolate (**3i**)

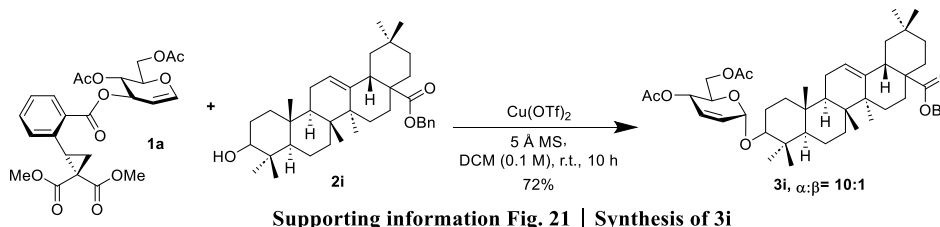

Following the procedure for **3a**, **2i** (67 mg, 0.12 mmol, 1.2 equiv) was transformed into **3i** (56 mg, 0.072 mmol, 72%,  $\alpha:\beta = 10:1$ ) as a white solid after purification by silica gel column chromatography (toluene:EtOAc = 6:1).  $[\alpha]_{\text{D}}^{25} = +78.0$  ( $c = 1.25$ ,  $\text{CHCl}_3$ );  $^1\text{H NMR}$  (400 MHz,  $\text{CDCl}_3$ )  $\delta$  7.35 – 7.28 (m, 6H), 5.87 – 5.84 (m, 1H), 5.77 – 5.73 (m, 1H), 5.32 – 5.26 (m, 2H), 5.14 (dd,  $J = 3.0, 1.5$  Hz, 1H), 5.09 (d,  $J = 12.6$  Hz, 1H), 5.04 (d,  $J = 12.5$  Hz, 1H), 4.29 – 4.17 (m, 2H), 4.16 – 4.09 (m, 1H), 3.30 (dd,  $J = 11.6, 4.1$  Hz, 1H), 2.90 (dd,  $J = 13.9, 4.5$  Hz, 1H), 2.08 – 2.07 (m, 6H), 2.02 – 1.94 (m, 1H), 1.86 – 1.83 (m, 2H), 1.75 – 1.08 (m, 25H), 1.07 – 1.00 (m, 4H), 0.90 (d,  $J = 9.1$  Hz, 12H), 0.81 – 0.72 (m, 4H), 0.60 (d,  $J = 3.5$  Hz, 3H);  $^{13}\text{C NMR}$  (100 MHz,  $\text{CDCl}_3$ )  $\delta$  177.5, 170.9, 170.3, 143.7, 136.5, 128.7, 128.4, 128.0, 127.9, 122.5, 91.3, 83.8, 77.3, 67.1, 65.9, 65.3, 63.1, 55.8, 47.6, 46.8, 45.9, 41.7, 41.4, 39.3, 38.3, 38.2, 37.0, 33.9, 33.1, 32.8, 32.4, 30.7, 28.3, 27.6, 25.8, 23.7, 23.4, 23.1, 22.6, 21.0, 20.9, 18.4, 16.9, 16.5, 15.4; HRMS (ESI)  $m/z$  Calcd  $\text{C}_{47}\text{H}_{66}\text{O}_8\text{Na}$   $[\text{M}+\text{Na}]^+$  781.4655, found 781.4661.

### Simvastatinyl 4,6-di-O-acetyl-2,3-dideoxy- $\alpha$ -D-erythro-hex-2-enopyranoside (**3j**)

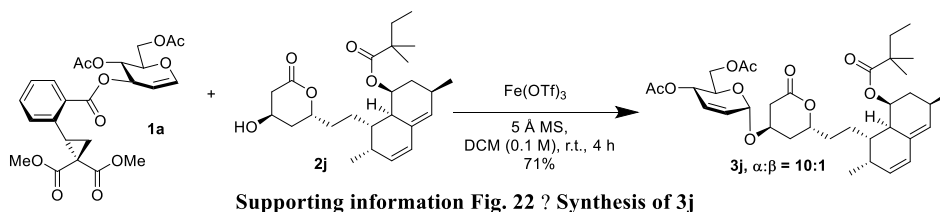

Following the procedure for **3a**, **2j** (51 mg, 0.12 mmol, 1.2 equiv) was transformed into **3j** (46 mg, 0.071 mmol, 71%,  $\alpha:\beta = 10:1$ ) as a colorless oil after purification by silica gel column chromatography (toluene:EtOAc = 5:1).  $[\alpha]_{\text{D}}^{24} = +151.6$  ( $c = 1.0$ ,  $\text{CHCl}_3$ );  $^1\text{H NMR}$  (400 MHz,  $\text{CD}_2\text{Cl}_2$ )  $\delta$  5.99 (d,  $J = 9.7$  Hz, 1H), 5.92 – 5.87 (m, 1H), 5.83 – 5.76 (m, 2H), 5.51 (t,  $J = 3.4$  Hz, 1H), 5.34 – 5.31 (m, 2H), 5.29 – 5.22 (m, 1H), 5.14 (s, 1H), 4.58 – 4.52 (m, 1H), 4.36 – 4.29 (m, 1H), 4.26 – 4.07 (m, 3H), 4.03 – 3.97 (m, 1H), 2.74 – 2.62 (m, 2H), 2.48 – 2.26 (m, 4H), 2.07 (s, 3H), 2.05 (s, 3H), 1.97 – 1.94 (m, 2H), 1.84 – 1.24 (m, 17H), 1.13 – 1.04 (m, 10H), 0.89 (d,  $J = 7.0$  Hz, 3H), 0.82 (t,  $J = 7.5$  Hz, 3H);  $^{13}\text{C NMR}$  (100 MHz,  $\text{CD}_2\text{Cl}_2$ )  $\delta$  177.3, 170.4, 170.1, 169.2, 132.9, 131.7, 129.7, 129.3, 128.3, 127.5, 93.2, 76.7, 73.0, 68.9, 67.9, 67.2, 65.2, 63.0, 42.8, 37.4, 36.7, 35.8, 34.8, 33.1, 33.0, 32.7, 30.7, 27.4, 24.6, 24.5, 24.1, 22.8, 20.8, 20.6, 13.6, 9.1; HRMS (ESI)  $m/z$  Calcd  $\text{C}_{35}\text{H}_{53}\text{O}_{10}$   $[\text{M}+\text{H}]^+$  633.3639, found 633.3629.

**Phenyl 6-*O*-(4,6-di-*O*-acetyl-2,3-dideoxy- $\alpha$ -D-erythro-hex-2-enopyranosyl)-2,3,4-tri-*O*-benzoyl-1-thio- $\beta$ -D-glucopyranoside (**3k**)**

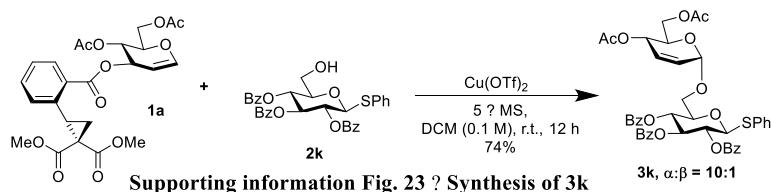

Following the procedure for **3a**, **2k** (72 mg, 0.12 mmol, 1.2 equiv) was transformed into **3k** (60 mg, 0.074 mmol, 74%,  $\alpha:\beta = 10:1$ ) as a white solid after purification by silica gel column chromatography (hexane:EtOAc = 3:1).  $[\alpha]_D^{25} = +22.0$  ( $c = 2.0$ ,  $\text{CHCl}_3$ );  $^1\text{H NMR}$  (400 MHz,  $\text{CDCl}_3$ )  $\delta$  7.98 – 7.90 (m, 4H), 7.81 – 7.77 (m, 2H), 7.54 – 7.50 (m, 4H), 7.43 – 7.35 (m, 5H), 7.33 – 7.23 (m, 5H), 5.92 – 5.85 (m, 2H), 5.77 – 5.73 (m, 1H), 5.61 (t,  $J = 9.7$  Hz, 1H), 5.52 – 5.43 (m, 1H), 5.31 – 5.28 (m, 1H), 5.08 – 5.02 (m, 2H), 4.22 – 4.13 (m, 1H), 4.11 – 4.07 (m, 1H), 4.06 – 3.94 (m, 3H), 3.83 – 3.74 (m, 1H), 2.06 (s, 3H), 1.99 (s, 3H);  $^{13}\text{C NMR}$  (100 MHz,  $\text{CDCl}_3$ )  $\delta$  170.7, 170.3, 165.8, 165.1, 165.0, 133.6, 133.3, 133.2, 132.8, 132.4, 132.1, 129.9, 129.8, 129.8, 129.7, 129.4, 129.2, 129.0, 128.88, 128.82, 128.51, 128.49, 128.4, 128.3, 128.2, 127.3, 94.5, 86.1, 77.3, 74.4, 70.5, 69.4, 66.93, 66.89, 65.1, 62.7, 21.0, 20.7; HRMS (ESI)  $m/z$  Calcd  $\text{C}_{43}\text{H}_{40}\text{O}_{13}\text{SNa}$   $[\text{M}+\text{Na}]^+$  819.2087, found 819.2103.

**Phenyl 6-*O*-(4,6-di-*O*-acetyl-2,3-dideoxy- $\alpha$ -D-erythro-hex-2-eno-pyranosyl)-2,3,4-tri-*O*-benzyl-1-thio- $\beta$ -D-glucopyranoside (**3l**)**

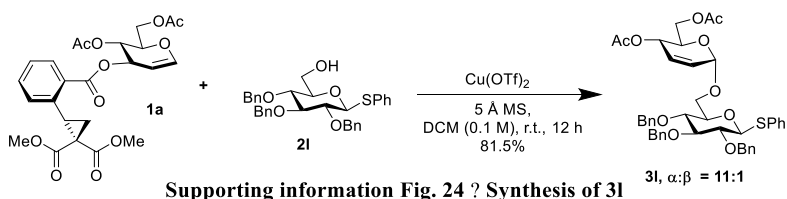

Following the procedure for **3a**, **2l** (66 mg, 0.12 mmol, 1.2 equiv) was transformed into **3l** (60 mg, 0.082 mmol, 82%,  $\alpha:\beta = 11:1$ ) as a colorless syrup after purification by silica gel column chromatography (hexane:EtOAc = 4:1).  $[\alpha]_D^{25} = +14.1$  ( $c = 1.0$ ,  $\text{CHCl}_3$ );  $^1\text{H NMR}$  (400 MHz,  $\text{CDCl}_3$ )  $\delta$  7.58 – 7.53 (m, 2H), 7.41 – 7.22 (m, 20H), 5.93 – 5.81 (m, 2H), 5.34 – 5.31 (m, 1H), 5.16 – 5.11 (m, 1H), 4.92 – 4.87 (m, 3H), 4.84 (d,  $J = 10.9$  Hz, 1H), 4.74 (d,  $J = 10.3$  Hz, 1H), 4.66 (d,  $J = 10.3$  Hz, 2H), 4.25 – 4.15 (m, 1H), 4.12 – 4.04 (m, 2H), 4.01 – 3.94 (m, 1H), 3.84 (dd,  $J = 11.3, 1.9$  Hz, 1H), 3.72 (t,  $J = 8.8$  Hz, 1H), 3.59 (t,  $J = 9.3$  Hz, 1H), 3.54 – 3.45 (m, 2H), 2.05 (s, 3H), 2.04 (s, 3H);  $^{13}\text{C NMR}$  (100 MHz,  $\text{CDCl}_3$ )  $\delta$  170.8, 170.3, 138.3, 138.1, 138.0, 133.8, 131.9, 131.6, 129.1, 128.9, 128.51, 128.49, 128.46, 128.23, 128.0, 127.93, 127.91, 127.81, 127.77, 127.68, 127.5, 94.8, 87.3, 86.7, 80.9, 78.6, 77.9, 75.9, 75.5, 75.1, 67.3, 67.0, 65.2, 62.8, 21.0, 20.8; HRMS (ESI)  $m/z$  Calcd  $\text{C}_{43}\text{H}_{46}\text{O}_{10}\text{SNa}$   $[\text{M}+\text{Na}]^+$  777.2709, found 777.2704.

**6-*O*-(4,6-Di-*O*-acetyl-2,3-dideoxy- $\alpha$ -D-erythro-hex-2-enopyranosyl)-1,2:3,4-di-*O*-isopropylidene- $\alpha$ -D-galactopyranoside (**3m**)**



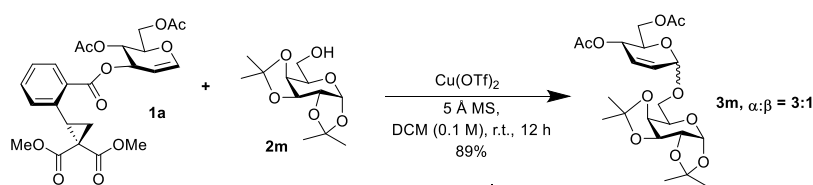

Supporting information Fig. 25 | Synthesis of 3m

Following the procedure for **3a**, **2m** (32 mg, 0.12 mmol, 1.2 equiv) was transformed into **3m** (43 mg, 0.089 mmol, 89%,  $\alpha:\beta = 3:1$ ) as a white solid after purification by silica gel column chromatography (toluene:EtOAc = 4:1).  $\alpha$  anomer:  $^1\text{H NMR}$  (400 MHz,  $\text{CDCl}_3$ )  $\delta$  5.88 – 5.80 (m, 2H), 5.51 (d,  $J = 5.0$  Hz, 1H), 5.33 – 5.28 (m, 1H), 5.08 – 5.07 (m, 1H), 4.59 (dd,  $J = 7.4, 2.4$  Hz, 1H), 4.33 – 4.19 (m, 4H), 4.17 – 4.09 (m, 2H), 4.03 – 3.94 (m, 2H), 3.86 (dd,  $J = 10.2, 6.3$  Hz, 1H), 3.78 – 3.68 (m, 1H), 2.09 (s, 3H), 2.07 (s, 3H), 1.52 (s, 3H), 1.43 (s, 3H), 1.33 (s, 3H), 1.31 (s, 3H). The data are identical to the literature report.<sup>9</sup>

***para*-Methoxyphenyl-4-*O*-(4,6-di-*O*-acetyl-2,3-dideoxy- $\alpha$ -D-erythro-hex-2-enopyranosyl)-2,3-*O*-isopropylidene- $\alpha$ -L-rhamnopyranoside (**3n**)**

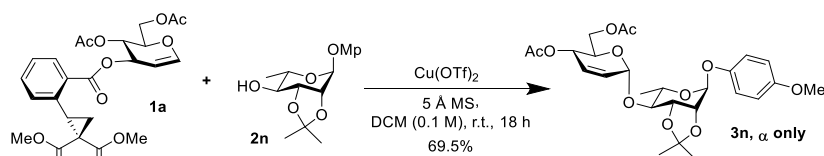

Supporting information Fig. 26 | Synthesis of 3n

Following the procedure for **3a**, **2n** (38 mg, 0.12 mmol, 1.2 equiv) was transformed into **3n** (37 mg, 0.070 mmol, 70%,  $\alpha$  only) as a white solid after purification by silica gel column chromatography (toluene:EtOAc = 5:1). When  $\text{Fe}(\text{OTf})_3$  as catalyst, the yield is 23%, and  $\alpha$  only.  $[\alpha]_{\text{D}}^{25} = +12.5$  ( $c = 1.0$ ,  $\text{CHCl}_3$ );  $^1\text{H NMR}$  (400 MHz,  $\text{CDCl}_3$ )  $\delta$  6.99 – 6.95 (m, 2H), 6.84 – 6.79 (m, 2H), 5.92 (dd,  $J = 10.3, 1.8$  Hz, 1H), 5.84 – 5.80 (m, 1H), 5.59 (s, 1H), 5.46 (dd,  $J = 9.7, 1.6$  Hz, 1H), 5.16 (d,  $J = 2.8$  Hz, 1H), 4.38 (dd,  $J = 12.2, 2.9$  Hz, 1H), 4.33 – 4.27 (m, 3H), 4.25 – 4.21 (m, 1H), 3.87 – 3.79 (m, 1H), 3.77 (s, 3H), 3.51 (dd,  $J = 10.1, 6.7$  Hz, 1H), 2.11 (s, 3H), 2.08 (s, 3H), 1.59 (s, 3H), 1.39 (s, 3H), 1.21 (d,  $J = 6.3$  Hz, 3H);  $^{13}\text{C NMR}$  (100 MHz,  $\text{CDCl}_3$ )  $\delta$  170.9, 170.3, 155.0, 150.1, 129.7, 127.2, 117.7, 114.6, 109.5, 96.1, 95.0, 80.7, 77.2, 75.9, 66.6, 65.7, 65.0, 62.4, 55.6, 28.1, 26.5, 21.0, 20.9, 17.5; HRMS (ESI)  $m/z$  Calcd  $\text{C}_{26}\text{H}_{34}\text{O}_{11}\text{Na}$   $[\text{M}+\text{Na}]^+$  545.1999, found 545.2020.

**Methyl 5-*O*-(4,6-di-*O*-acetyl-2,3-dideoxy- $\alpha$ -D-erythro-hex-2-enopyranosyl)-2,3-*O*-isopropylidene- $\beta$ -D-ribofuranoside (**3o**)**

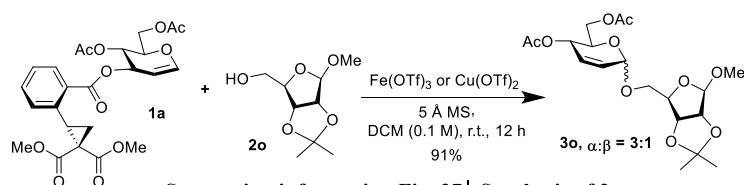

Supporting information Fig. 27 | Synthesis of 3o

Following the procedure for **3a**, **2o** (25 mg, 0.12 mmol, 1.2 equiv) was transformed into **3o** (38 mg, 0.091 mmol, 91%,  $\alpha:\beta = 3:1$ ) as a colorless syrup after purification by silica gel column chromatography (toluene:EtOAc = 5:1). When  $\text{Fe}(\text{OTf})_3$  as catalyst, the yield is 87%, and  $\alpha:\beta = 3:1$ .  $\alpha:\beta = 3:1$ :  $^1\text{H NMR}$  (400 MHz,  $\text{CDCl}_3$ )  $\delta$  6.00 – 5.92 (m, 1H), 5.90 – 5.78 (m, 2H), 5.29 (dd,  $J = 9.7, 1.6$  Hz, 1H), 5.18 – 5.13

(m, 1H), 5.05 – 5.00 (m, 1H), 4.94 – 4.93 (m, 1.5H), 4.70 – 4.66 (m, 1.5H), 4.57 – 4.55 (m, 1.5H), 4.39 – 4.35 (m, 1H), 4.32 – 4.21 (m, 2.6H), 4.17 (dd,  $J = 12.1, 2.4$  Hz, 1H), 4.10 – 4.02 (m, 1.7H), 3.82 – 3.75 (m, 1.9H), 3.58 (ddd,  $J = 19.2, 10.2, 7.8$  Hz, 1.6H), 3.30 (s, 1H), 3.29 (s, 3H), 2.09 (s, 3H), 2.08 (s, 1H), 2.07 (s, 3H), 2.06 (s, 1H), 1.46 (s, 4H), 1.30 (s, 4H);  $^{13}\text{C}$  NMR (100 MHz,  $\text{CDCl}_3$ ):  $\delta$  170.8, 170.2, 129.3, 127.4, 112.3, 109.3, 95.0, 85.12, 85.07, 82.1, 81.9, 72.8, 69.7, 68.7, 67.1, 65.1, 64.2, 63.5, 62.8, 54.9, 54.8, 26.5, 26.4, 25.0, 24.9, 21.0, 20.8, 20.75. The data are identical to the literature report.<sup>20</sup>

### Methoxyl 2-*O*-(4,6-di-*O*-acetyl-2,3-dideoxy- $\alpha$ -D-erythro-hex-2-enopyranosyl)-3,4,6-*O*-tri-*O*-benzyl- $\alpha$ -D-mannopyranoside (**3p**)

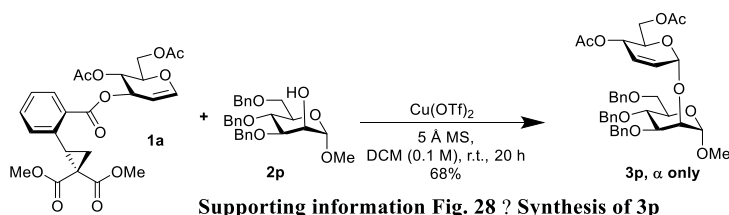

Following the procedure for **3a**, **2p** (57 mg, 0.12 mmol, 1.2 equiv) was transformed into **3p** (47 mg, 0.068 mmol, 68%,  $\alpha$  only) as a colorless syrup after purification by silica gel column chromatography (toluene:EtOAc = 4:1).  $[\alpha]_{\text{D}}^{25} = +27.3$  ( $c = 1.0$ ,  $\text{CHCl}_3$ );  $^1\text{H}$  NMR (400 MHz,  $\text{CDCl}_3$ )  $\delta$  7.38 – 7.24 (m, 14H), 7.18 – 7.15 (m, 2H), 5.94 – 5.91 (m, 1H), 5.89 – 5.84 (m, 1H), 5.30 – 5.26 (m, 1H), 5.25 – 5.21 (m, 1H), 4.86 – 4.80 (m, 2H), 4.72 – 4.64 (m, 3H), 4.54 (d,  $J = 12.1$  Hz, 1H), 4.50 (d,  $J = 10.8$  Hz, 1H), 4.23 – 4.15 (m, 3H), 4.09 (t,  $J = 2.4$  Hz, 1H), 3.93 – 3.83 (m, 2H), 3.79 – 3.70 (m, 3H), 3.36 (s, 3H), 2.10 (s, 3H), 2.06 (s, 3H);  $^{13}\text{C}$  NMR (100 MHz,  $\text{CDCl}_3$ )  $\delta$  170.8, 170.4, 138.43, 138.38, 128.8, 128.5, 128.33, 128.30, 127.94, 127.88, 127.75, 127.7, 127.6, 127.51, 127.48, 100.3, 95.8, 80.1, 75.1, 74.9, 74.8, 73.4, 72.4, 71.7, 69.3, 67.0, 65.4, 63.2, 54.7, 29.7, 21.0, 20.8; HRMS (ESI)  $m/z$  Calcd  $\text{C}_{38}\text{H}_{44}\text{O}_{11}\text{Na}$   $[\text{M}+\text{Na}]^+$  699.2781, found 699.2766.

### *para*-Methylphenyl 4,6-di-*O*-acetyl-2,3-dideoxy-erythro-hex-2-eno-1-thio- $\alpha$ -D-pyranoside (**3q**)

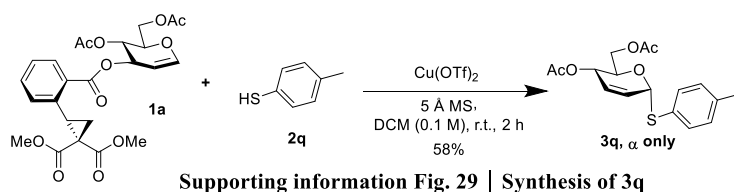

Following the procedure for **3a**, **2q** (15 mg, 0.12 mmol, 1.2 equiv) was transformed into **3q** (20 mg, 0.058 mmol, 58%,  $\alpha$  only) as a white solid after purification by silica gel column chromatography (toluene:EtOAc = 6:1). **When  $\text{Fe}(\text{OTf})_3$  as catalyst, there is no reaction.**  $^1\text{H}$  NMR (400 MHz,  $\text{CDCl}_3$ )  $\delta$  7.44 (d,  $J = 8.2$  Hz, 2H), 7.12 (d,  $J = 7.8$  Hz, 2H), 6.08 – 6.04 (m, 1H), 5.86 – 5.83 (m, 1H), 5.69 – 5.67 (m, 1H), 5.39 – 5.35 (m, 1H), 4.51 – 4.46 (m, 1H), 4.30 – 4.20 (m, 2H), 2.33 (s, 3H), 2.11 (s, 3H), 2.09 (s, 3H). The data are identical to the literature report.<sup>21</sup>

### 1-Thio-(4,6-di-*O*-acetyl-2,3-dideoxy- $\alpha$ -D-erythro-hex-2-enopyranosyl)-2,3,4,6-tetra-*O*-acetyl- $\beta$ -D-galactopyranoside (**3r**)

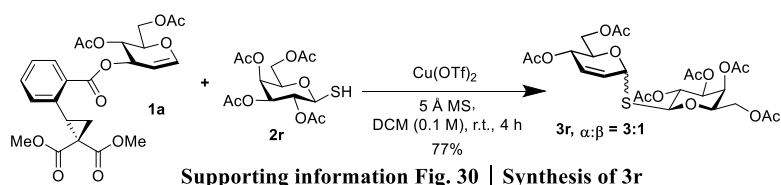

Following the procedure for **3a**, **2r** (45 mg, 0.12 mmol, 1.2 equiv) was transformed into **3r** (45 mg, 0.077 mmol, 77%,  $\alpha:\beta = 3:1$ ) as a colorless syrup after purification by silica gel column chromatography (toluene:EtOAc = 4:1). When  $\text{Fe}(\text{OTf})_3$  as catalyst, there is no reaction.  $\alpha:\beta = 3:1$ :  $^1\text{H}$  NMR (400 MHz,  $\text{CDCl}_3$ )  $\delta$  5.98 (s, 0.6H), 5.92 – 5.82 (m, 3H), 5.75 (d,  $J = 1.6$  Hz, 0.3H), 5.47 – 5.40 (m, 2.4H), 5.31 (t,  $J = 9.9$  Hz, 1H), 5.26 – 5.21 (m, 0.7H), 5.09 – 5.06 (dd,  $J = 8.0, 4.0$  Hz, 0.3H), 5.01 (dd,  $J = 10.0, 3.3$  Hz, 1H), 4.92 (d,  $J = 10.0$  Hz, 0.3H), 4.63 (d,  $J = 9.9$  Hz, 1H), 4.42 – 4.33 (m, 1.3H), 4.28 – 4.07 (m, 6.3H), 4.02 – 3.92 (m, 1.7H), 2.14 (d,  $J = 2.8$  Hz, 4H), 2.09 – 2.03 (m, 16H), 1.97 (s, 4H);  $^{13}\text{C}$  NMR (100 MHz,  $\text{CDCl}_3$ )  $\delta$  170.7, 170.6, 170.4, 170.34, 170.25, 170.20, 170.18, 170.1, 170.0, 169.7, 169.3, 129.4, 128.2, 127.8, 126.1, 83.5, 81.4, 79.9, 77.3, 75.5, 74.8, 74.5, 74.4, 72.0, 71.8, 68.4, 67.3, 67.2, 64.4, 64.2, 63.1, 62.4, 61.6, 61.4, 21.0, 20.8, 20.81, 20.77, 20.69, 20.66, 20.64, 20.60, 20.58, 20.55; HRMS (ESI)  $m/z$  Calcd  $\text{C}_{24}\text{H}_{32}\text{O}_{14}\text{SNa}$   $[\text{M}+\text{Na}]^+$  599.1410, found 599.1465.

### *N*-(4,6-Di-*O*-acetyl-2,3-dideoxy- $\alpha$ -D-erythro-hex-2-enopyranosyl)-4-methylbenzenesulfonamide (**3s**)

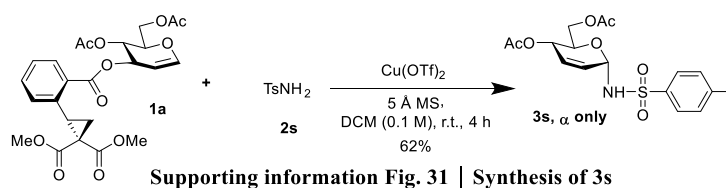

Following the procedure for **3a**, **2s** (21 mg, 0.12 mmol, 1.2 equiv) was transformed into **3s** (24 mg, 0.062 mmol, 62%,  $\alpha$  only) as a white solid after purification by silica gel column chromatography (toluene:EtOAc = 4:1).  $[\alpha]_{\text{D}}^{25} = +77.4$  ( $c = 1.0$ ,  $\text{CHCl}_3$ );  $^1\text{H}$  NMR (400 MHz,  $\text{CDCl}_3$ )  $\delta$  7.84 – 7.78 (m, 2H), 7.30 (d,  $J = 8.1$  Hz, 2H), 5.93 – 5.90 (m, 1H), 5.82 – 5.79 (m, 2H), 5.63 – 5.55 (m, 1H), 5.28 – 5.24 (m, 1H), 3.89 (dd,  $J = 12.2, 3.6$  Hz, 1H), 3.57 – 3.51 (m, 1H), 3.36 (dd,  $J = 12.2, 2.8$  Hz, 1H), 2.43 (s, 3H), 2.02 (s, 6H), 2.01 (s, 3H);  $^{13}\text{C}$  NMR (100 MHz,  $\text{CDCl}_3$ )  $\delta$  170.7, 170.0, 143.9, 138.6, 130.6, 129.6, 127.2, 126.7, 66.8, 64.3, 61.8, 21.5, 20.9, 20.7; HRMS (ESI)  $m/z$  Calcd  $\text{C}_{17}\text{H}_{21}\text{O}_7\text{NS}$   $[\text{M}+\text{H}]^+$  384.1117, found 384.1111.

### 3-(4,6-Di-*O*-acetyl-2,3-dideoxy- $\alpha$ -D-erythro-hex-2-enopyranosyl)-1-propene (**3t**)

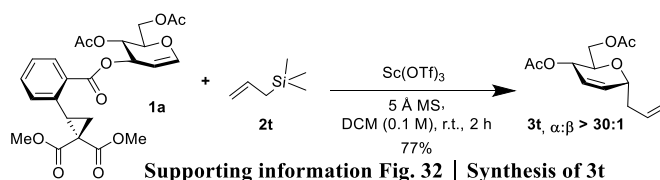

A solution of **1a** (50 mg, 0.1 mmol, 1.0 equiv) and **2t** (33  $\mu\text{L}$ , 0.12 mmol, 1.2 equiv) in anhydrous DCM (1 mL, 0.1 M) containing freshly activated 5Å molecular sieve was stirred at room temperature for 15 min before  $\text{Sc}(\text{OTf})_3$  (5.0 mg, 0.01 mmol, 0.1 equiv) was added. The mixture was stirred at room temperature for 2 h until **2t** was fully consumed (determined by TLC). The reaction was then quenched with

triethylamine and the mixture was directly loaded onto silica gel by concentrating the mixture *in vacuo*. The residue was further purified by silica gel column chromatography (hexane:EtOAc = 4:1) obtained the **3t** (20 mg, 0.077 mmol, 77%,  $\alpha:\beta > 30:1$ ) as a colorless oil.  $^1\text{H NMR}$  (400 MHz,  $\text{CDCl}_3$ )  $\delta$  5.96 – 5.76 (m, 3H), 5.17 – 5.07 (m, 3H), 4.31 – 4.20 (m, 2H), 4.15 (dd,  $J = 11.8, 3.5$  Hz, 1H), 3.98 – 3.94 (m, 1H), 2.51 – 2.42 (m, 1H), 2.36 – 2.29 (m, 1H), 2.09 (s, 6H). The data are identical to the literature report.<sup>22</sup>

#### 4-*O*-Acetyl-1,6-anhydro-2,3-dideoxy- $\beta$ -D-erythro-hex-2-enopyranose (**3u**)

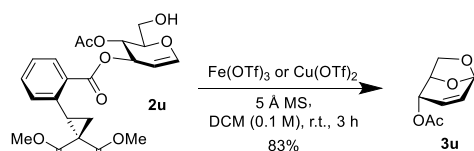

Supporting information Fig. 33 | Synthesis of **3u**

A solution of **2u** (60 mg, 0.13 mmol, 1.0 equiv) in anhydrous DCM (1 mL, 0.1 M) containing freshly activated 5 Å molecular sieve was stirred at room temperature for 15 min before  $\text{Cu}(\text{OTf})_2$  (4.8 mg, 0.013 mmol, 0.1 equiv) was added. The mixture was stirred at room temperature for 3 h until **2u** was fully consumed (determined by TLC). The reaction was then quenched with triethylamine and the mixture was directly loaded onto silica gel by concentrating the mixture *in vacuo*. The residue was further purified by silica gel column chromatography (hexane:EtOAc = 4:1) afforded the **3u** as a colorless oil (18 mg, 0.083 mmol, 83%).  $^1\text{H NMR}$  (400 MHz,  $\text{CDCl}_3$ )  $\delta$  6.20 – 6.17 (m, 1H), 5.81 – 5.77 (m, 1H), 5.59 (d,  $J = 3.4$  Hz, 1H), 4.80 – 4.78 (m, 1H), 4.73 – 4.70 (m, 1H), 3.96 (dd,  $J = 8.0, 6.6$  Hz, 1H), 3.53 (dd,  $J = 8.0, 2.1$  Hz, 1H), 2.12 (s, 3H). The data are identical to the literature report.<sup>23</sup>

**Gram-scale synthesis:** A solution of **2u** (2.9 g, 6.5 mmol, 1.0 equiv) in anhydrous DCM (66 mL, 0.1 M) containing freshly activated 5 Å molecular sieve was stirred at room temperature for 15 min before  $\text{Fe}(\text{OTf})_3$  (325 mg, 0.65 mmol, 0.1 equiv) was added. The mixture was stirred at room temperature for 5 h until **2u** was fully consumed (determined by TLC). The reaction was then quenched with triethylamine and the mixture was directly loaded onto silica gel by concentrating the mixture *in vacuo*. The residue was further purified by silica gel column chromatography (hexane:EtOAc = 4:1) afforded the **3u** as a colorless oil (951 mg, 5.5 mmol, 85%)

## Section 4. Allylic rearrangement with **1b–d** as donors.

### L-Menthyl 4,6-*O*-[bis(1,1-dimethylethyl)silylene]-2,3-dideoxy- $\alpha$ -D-erythro-hex-2-enopyranoside (**3ba**)

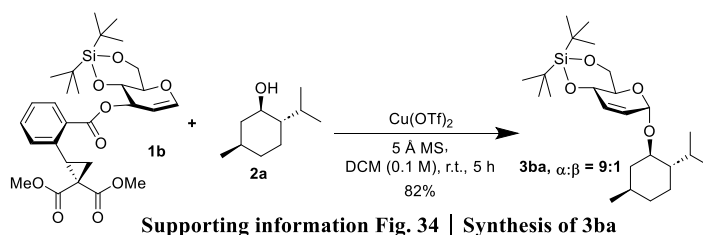

Supporting information Fig. 34 | Synthesis of **3ba**

Following the procedure for **3a**, **2a** (19 mg, 0.12 mmol, 1.2 equiv) was transformed into **3ba** (34 mg, 0.082 mmol, 82%,  $\alpha:\beta = 9:1$ ) as a white solid after purification by silica gel column chromatography (toluene:EtOAc = 50:1).  $[\alpha]_{\text{D}}^{25} = -0.4$  ( $c = 1.0$ ,  $\text{CHCl}_3$ );  $^1\text{H NMR}$  (400 MHz,  $\text{CDCl}_3$ )  $\delta$  6.01 (d,  $J = 10.4$  Hz,

1H), 5.69 – 5.66 (m, 1H), 4.99 (t,  $J = 1.3$  Hz, 1H), 4.39 – 4.31 (m, 1H), 4.13 (dd,  $J = 3.6, 8.4$  Hz, 1H), 3.91 – 3.83 (m, 2H), 3.38 – 3.32 (m, 1H), 2.15 – 1.98 (m, 2H), 1.65 – 1.57 (m, 3H), 1.44 – 1.37 (m, 1H), 1.05 (s, 10H), 0.99 (s, 10H), 0.92 – 0.81 (m, 9H), 0.77 – 0.72 (m, 4H);  $^{13}\text{C}$  NMR (100 MHz,  $\text{CDCl}_3$ )  $\delta$  134.1, 125.2, 96.4, 80.6, 70.6, 67.1, 66.9, 48.7, 43.7, 34.3, 31.8, 27.5, 27.1, 25.6, 23.2, 22.8, 22.3, 21.2, 20.1, 16.2; HRMS (ESI)  $m/z$  Calcd  $\text{C}_{24}\text{H}_{45}\text{O}_4\text{Si}$   $[\text{M}+\text{H}]^+$  425.3087, found 425.3065.

**Phenyl 6-*O*-[4,6-*O*-(bis(1,1-dimethylethyl)silylene)-2,3-dideoxy- $\alpha$ -D-erythro-hex-2-enopyranosyl]-2,3,4-tri-*O*-benzoyl-1-thio- $\beta$ -D-glucopyranoside (**3bb**)**

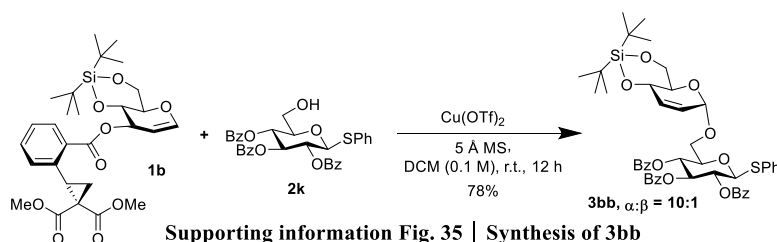

Following the procedure for **3a**, **2k** (70 mg, 0.12 mmol, 1.2 equiv) was transformed into **3bb** (65 mg, 0.078 mmol, 78%,  $\alpha:\beta = 10:1$ ) as a foamy solid after purification by silica gel column chromatography (toluene:EtOAc = 4:1).  $[\alpha]_{\text{D}}^{25} = +26.9$  ( $c = 1.0$ ,  $\text{CHCl}_3$ );  $^1\text{H}$  NMR (400 MHz,  $\text{CDCl}_3$ )  $\delta$  7.98 – 7.92 (m, 4H), 7.82 – 7.78 (m, 2H), 7.56 – 7.50 (m, 4H), 7.43 – 7.23 (m, 12H), 6.02 (d,  $J = 10.4$ , 1H), 5.88 (t,  $J = 9.5$  Hz, 1H), 5.60 – 5.51 (m, 2H), 5.46 (t,  $J = 9.7$  Hz, 1H), 5.02 (d,  $J = 10.0$  Hz, 1H), 4.96 – 4.95 (m, 1H), 4.37 – 4.30 (m, 1H), 4.07 – 3.97 (m, 3H), 3.84 – 3.80 (m, 2H), 3.76 – 3.70 (m, 1H), 1.05 (s, 10H), 0.97 (s, 10H);  $^{13}\text{C}$  NMR (100 MHz,  $\text{CDCl}_3$ )  $\delta$  165.8, 165.1, 165.0, 134.5, 133.42, 133.39, 133.3, 133.2, 131.6, 129.9, 129.82, 129.78, 129.3, 129.00, 128.95, 128.9, 128.5, 128.4, 128.29, 128.25, 124.5, 94.9, 85.9, 77.3, 74.4, 70.5, 70.4, 69.7, 67.3, 67.1, 27.51, 27.47, 27.11, 27.06, 22.8, 20.0; HRMS (ESI)  $m/z$  Calcd  $\text{C}_{47}\text{H}_{52}\text{O}_{11}\text{SiSNa}$   $[\text{M}+\text{Na}]^+$  875.2897, found 875.2835.

***para*-Methoxyphenyl 4,6-*O*-[bis(1,1-dimethylethyl)silylene]-2,3-dideoxy- $\alpha$ -D-erythro-hex-2-enopyranoside (**3bc**)**

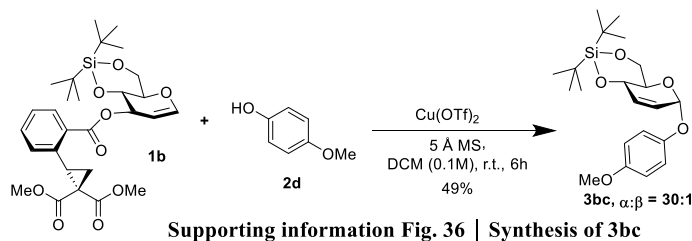

Following the procedure for **3a**, **2d** (15 mg, 0.12 mmol, 1.2 equiv) was transformed into **3bc** (19 mg, 0.049 mmol, 49%,  $\alpha:\beta = 30:1$ ) as a white solid after purification by silica gel column chromatography (toluene:EtOAc = 4:1).  $[\alpha]_{\text{D}}^{25} = +44.2$  ( $c = 2.0$ ,  $\text{CHCl}_3$ );  $^1\text{H}$  NMR (400 MHz,  $\text{CDCl}_3$ )  $\delta$  7.03 – 6.98 (m, 2H), 6.86 – 6.81 (m, 2H), 6.19 – 6.14 (m, 1H), 5.83 – 5.79 (m, 1H), 5.49 – 5.48 (m, 1H), 4.44 – 4.41 (m, 1H), 4.17 – 4.12 (m, 1H), 3.98 – 3.86 (m, 2H), 3.78 (s, 3H), 1.07 (s, 9H), 1.00 (s, 9H);  $^{13}\text{C}$  NMR (100 MHz,  $\text{CDCl}_3$ )  $\delta$  155.1, 151.4, 135.2, 124.4, 118.4, 114.6, 94.4, 70.2, 68.0, 67.0, 55.7, 27.5, 27.1, 22.8, 20.1; HRMS (ESI)  $m/z$  Calcd  $\text{C}_{21}\text{H}_{32}\text{O}_5\text{SiNa}$   $[\text{M}+\text{Na}]^+$  415.1917, found 415.1924.

### L-Menthyl 4,6-di-O-acetyl-2,3-dideoxy- $\alpha$ -D-threo-hex-2-enopyranoside (**3ca**)

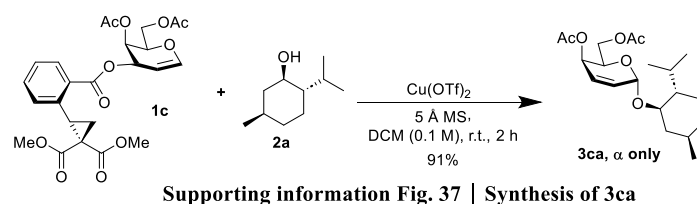

Following the procedure for **3a**, **2a** (19 mg, 0.12 mmol, 1.2 equiv) was transformed into **3ca** (34 mg, 0.091 mmol, 91%,  $\alpha$  only) as a white solid after purification by silica gel column chromatography (toluene:EtOAc = 6:1).  $^1\text{H}$  NMR (400 MHz,  $\text{CDCl}_3$ )  $\delta$  6.13 – 6.07 (m, 1H), 6.04 (dd,  $J = 10.0, 2.8$  Hz, 1H), 5.14 (d,  $J = 2.8$  Hz, 1H), 5.01 (dd,  $J = 5.2, 2.5$  Hz, 1H), 4.43 – 4.39 (m, 1H), 4.26 – 4.17 (m, 2H), 3.47 – 3.41 (m, 1H), 2.24 – 2.18 (m, 1H), 2.08 (s, 3H), 2.07 (s, 3H), 1.69 – 1.58 (m, 3H), 1.46 – 1.40 (m, 1H), 1.29 – 1.20 (m, 3H), 1.09 – 0.87 (m, 10H), 0.86 – 0.75 (m, 4H). The data are identical to the literature report.<sup>24</sup>

### Phenyl 6-O-(4,6-di-O-acetyl-2,3-dideoxy- $\alpha$ -D-threo-hex-2-enopyranosyl)-2,3,4-tri-O-benzoyl-1-thio- $\beta$ -D-glucopyranoside (**3cb**)

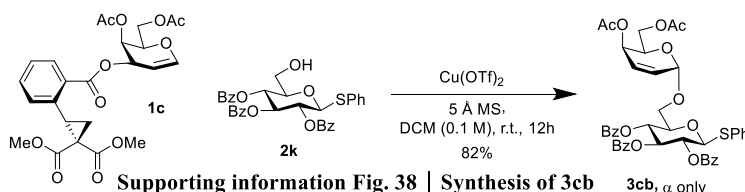

Following the procedure for **3a**, **2k** (72 mg, 0.12 mmol, 1.2 equiv) was transformed into **3cb** (66 mg, 0.082 mmol, 82%,  $\alpha$  only) as a colorless syrup after purification by silica gel column chromatography (toluene:EtOAc = 4:1).  $^1\text{H}$  NMR (400 MHz,  $\text{CDCl}_3$ )  $\delta$  8.00 – 7.96 (m, 2H), 7.95 – 7.91 (m, 2H), 7.83 – 7.79 (m, 2H), 7.56 – 7.49 (m, 4H), 7.45 – 7.36 (m, 5H), 7.35 – 7.25 (m, 6H), 6.12 – 6.08 (m, 1H), 5.98 – 5.88 (m, 2H), 5.63 (t,  $J = 9.7$  Hz, 1H), 5.49 (t,  $J = 9.7$  Hz, 1H), 5.17 – 5.06 (m, 2H), 4.97 (dd,  $J = 5.5, 2.5$  Hz, 1H), 4.35 – 4.31 (m, 1H), 4.16 – 4.08 (m, 2H), 4.07 – 4.00 (m, 2H), 3.83 – 3.77 (m, 1H), 2.08 (s, 3H), 1.93 (s, 3H). The data are identical to the literature report.<sup>25</sup>

### *para*-Methoxyphenyl 4,6-di-O-acetyl-2,3-dideoxy- $\alpha$ -D-threo-hex-2-enopyranoside (**3cc**)

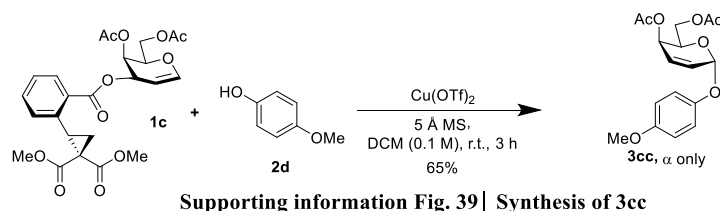

Following the procedure for **3a**, **2d** (15 mg, 0.12 mmol, 1.2 equiv) was transformed into **3cc** (22 mg, 0.065 mmol, 65%,  $\alpha$  only) as a colorless oil after purification by silica gel column chromatography (hexane:EtOAc:Et<sub>2</sub>O = 5:1:1).  $^1\text{H}$  NMR (400 MHz,  $\text{CDCl}_3$ )  $\delta$  7.08 – 7.04 (m, 2H), 6.85 – 6.80 (m, 2H), 6.27 – 6.22 (m, 1H), 6.19 (dd,  $J = 10.0, 3.0$  Hz, 1H), 5.62 (d,  $J = 2.9$  Hz, 1H), 5.11 (dd,  $J = 5.2, 2.5$  Hz, 1H), 4.54 – 4.50 (m, 1H), 4.29 – 4.19 (m, 2H), 3.78 (s, 3H), 2.10 (s, 3H), 1.96 (s, 3H). The data are identical to the literature report.<sup>25</sup>

### L-Menthyl 4-O-acetyl-6-deoxy-2,3-dideoxy- $\alpha$ -L-erythrohex-2-enopyranoside (**3da**)

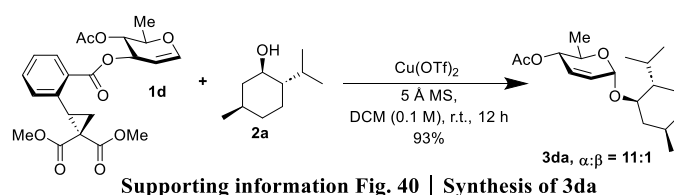

Following the procedure for **3a**, **2a** (19.5 mg, 0.12 mmol, 1.2 equiv) was transformed into **3da** (28 mg, 0.087 mmol, 87%,  $\alpha$ : $\beta$  = 11:1) as a white solid after purification by silica gel column chromatography (toluene:EtOAc = 8:1).  $^1\text{H NMR}$  (400 MHz,  $\text{CDCl}_3$ )  $\delta$  5.85 – 5.82 (m, 1H), 5.73 – 5.70 (m, 1H), 5.15 – 5.11 (m, 1H), 5.04 – 5.01 (m, 1H), 3.98 – 3.91 (m, 1H), 3.56 – 3.49 (m, 1H), 2.28 – 2.22 (m, 1H), 2.08 (s, 3H), 1.68 – 1.61 (m, 2H), 1.42 – 1.17 (m, 6H), 1.09 – 0.73 (m, 14H). The data are identical to the literature report.<sup>26</sup>

### Phenyl 6-O-(4-O-acetyl-6-deoxy-2,3-dideoxy- $\alpha$ -L-erythrohex-2-enopyranosyl)-2,3,4-tri-O-benzoyl-1-thio- $\beta$ -D-glucopyranoside (**3db**)

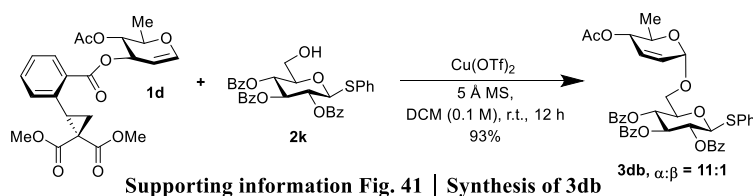

Following the procedure for **3a**, **2k** (73 mg, 0.12 mmol, 1.2 equiv) was transformed into **3db** (72 mg, 0.093 mmol, 93%,  $\alpha$ : $\beta$  = 11:1) as a colorless syrup after purification by silica gel column chromatography (toluene:EtOAc = 12:1).  $[\alpha]_{\text{D}}^{25} = -1.2$  ( $c = 2.3$ ,  $\text{CHCl}_3$ );  $^1\text{H NMR}$  (400 MHz,  $\text{CDCl}_3$ )  $\delta$  7.99 – 7.94 (m, 2H), 7.93 – 7.89 (m, 2H), 7.81 – 7.77 (m, 2H), 7.54 – 7.48 (m, 4H), 7.43 – 7.22 (m, 12H), 5.92 – 5.80 (m, 2H), 5.76 – 5.72 (m, 1H), 5.56 – 5.47 (m, 2H), 5.07 – 5.01 (m, 2H), 4.99 – 4.94 (m, 1H), 4.08 – 3.91 (m, 3H), 3.76 (dd,  $J = 11.6, 6.3$  Hz, 1H), 2.09 (s, 3H), 1.15 (d,  $J = 6.2$  Hz, 3H);  $^{13}\text{C NMR}$  (100 MHz,  $\text{CDCl}_3$ )  $\delta$  170.5, 165.8, 165.3, 165.1, 133.5, 133.3, 133.2, 133.1, 132.8, 132.3, 129.9, 129.8, 129.8, 129.6, 129.2, 129.01, 128.96, 128.9, 128.8, 128.5, 128.4, 128.3, 128.2, 127.5, 95.1, 86.3, 78.2, 77.3, 74.3, 70.8, 70.7, 69.5, 67.4, 66.5, 64.9, 36.7, 29.7, 29.4, 24.7, 22.7, 21.1, 18.6, 17.9, 14.2; HRMS (ESI)  $m/z$  Calcd  $\text{C}_{41}\text{H}_{38}\text{O}_{11}\text{SNa}$   $[\text{M}+\text{Na}]^+$  761.2033, found 761.2054.

### *para*-Methoxyphenyl 4-O-acetyl-6-deoxy-2,3-dideoxy- $\alpha$ -L-erythrohex-2-enopyranoside (**3dc**)

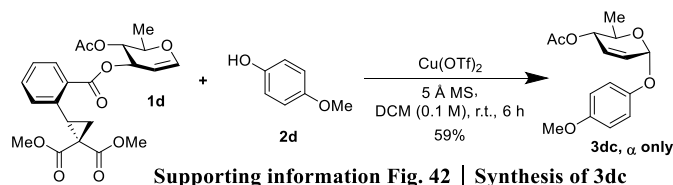

Following the procedure for **3a**, **2d** (73 mg, 0.12 mmol, 1.2 equiv) was transformed into **3dc** (72 mg, 0.078 mmol, 78%,  $\alpha$  only) as a colorless syrup after purification by silica gel column chromatography (toluene:EtOAc = 12:1).  $^1\text{H NMR}$  (400 MHz,  $\text{CDCl}_3$ )  $\delta$  7.05 – 7.00 (m, 2H), 6.86 – 6.81 (m, 2H), 6.02 – 5.92 (m, 2H), 5.52 (s, 1H), 5.11 (d,  $J = 9.1$  Hz, 1H), 4.15 – 4.08 (m, 1H), 3.78 (s, 3H), 2.11 (s, 3H), 1.23 (d,  $J = 6.2$  Hz, 3H). The data are identical to the literature report.<sup>27</sup>

## Section 5. Application of ferrier rearrangement.

### 6-*O*-(4,6-Di-*O*-acetyl-2,3-dideoxy- $\alpha$ -D-threo-hex-2-enopyranosyl) dapagliflozin triacetate (**7**)

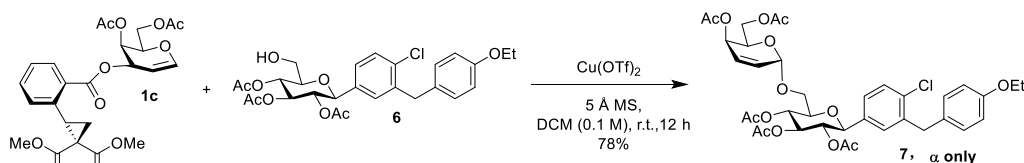

A solution of **1c** (50 mg, 0.1 mmol, 1.0 equiv) and **6**<sup>28</sup> (65 mg, 0.12 mmol, 1.2 equiv) in anhydrous DCM (1 mL, 0.1 M) containing freshly activated 5 Å molecular sieve was stirred at room temperature for 15 min before Cu(OTf)<sub>2</sub> (3.7 mg, 0.01 mmol, 0.1 equiv) was added. The mixture was stirred at room temperature for 12 h until **6** was fully consumed (determined by TLC). The reaction was then quenched with triethylamine and the mixture was directly loaded onto silica gel by concentrating the mixture *in vacuo*. The residue was further purified by silica gel column chromatography (toluene:EtOAc:Et<sub>2</sub>O = 4:1:1) to give the **7** as a colorless crystalline solid (59 mg, 0.078 mmol, 78%, only).  $[\alpha]_{\text{D}}^{25} = -40.7$  ( $c = 1.0$ , CHCl<sub>3</sub>); <sup>1</sup>H NMR (400 MHz, CDCl<sub>3</sub>)  $\delta$  7.33 (d,  $J = 8.2$  Hz, 1H), 7.15 (dd,  $J = 8.3, 2.2$  Hz, 1H), 7.06 – 7.01 (m, 3H), 6.83 – 6.77 (m, 2H), 6.13 – 6.09 (m, 1H), 6.00 (dd,  $J = 10.0, 3.0$  Hz, 1H), 5.30 – 5.17 (m, 2H), 5.07 – 4.96 (m, 3H), 4.32 – 4.23 (m, 2H), 4.19 – 4.11 (m, 2H), 4.06 – 3.99 (m, 2H), 3.99 – 3.92 (m, 2H), 3.84 (dd,  $J = 11.1, 4.6$  Hz, 1H), 3.78 – 3.73 (m, 1H), 3.66 (dd,  $J = 11.1, 2.8$  Hz, 1H), 2.06 (s, 3H), 2.04 (s, 3H), 2.03 (s, 3H), 1.98 (s, 3H), 1.69 (s, 3H), 1.39 (t,  $J = 7.0$  Hz, 3H); <sup>13</sup>C NMR (100 MHz, CDCl<sub>3</sub>)  $\delta$  170.5, 170.4, 170.3, 169.5, 168.8, 157.5, 139.0, 135.4, 134.5, 131.0, 130.1, 129.80, 129.76, 125.9, 125.4, 114.5, 93.8, 74.3, 72.6, 69.2, 66.6, 66.4, 63.4, 62.5, 62.4, 38.2, 20.81, 20.79, 20.71, 20.65, 20.3, 14.9; HRMS (ESI)  $m/z$  Calcd C<sub>37</sub>H<sub>41</sub>O<sub>14</sub>ClNa [M+Na]<sup>+</sup> 767.2083, found 767.2054.

## Section 6. Computational details.

### General computational methods

To explore the mechanistic details of the stereoselective Ferrier rearrangement, we performed Density Functional Theory (DFT) simulations of the reaction employing model donor **1a** and model acceptor methanol (MeOH) and *p*-methoxyphenol (*p*-OMePhOH), and Cu(OTf)<sub>2</sub> and Sc(OTf)<sub>3</sub> as the catalyst, to investigate the mechanisms giving rise to the  $\alpha$ -stereoselectivity of the reaction. We proposed that our Cu(OTf)<sub>2</sub>-catalyzed Ferrier rearrangement with  $\alpha$ -selective glycosylation proceeds in three stages: Firstly, the copper(II)-promoted CCBz ring opening resulting in the dissociation of C3-substituent and the migration of the 1,2-double bond, giving rise to an ion pair of the LG anion and glycosyl oxocarbenium. Then another copper(II) species coordinates to the 2,3-position of the glycosyl oxocarbenium, from either  $\alpha$ - or  $\beta$ -face, bringing the coordinated alcohol acceptor to the proximity of the glycosyl oxocarbenium. Finally, a directed nucleophilic  $\alpha$ -attack by the alcohol at the anomeric position forms the glycosidic bond, and the following dissociation of the copper gives rise to the 2,3-unsaturated product. We assumed that the metal center participating in coordination carries an accompanying triflate anion, which serves as a proton



acceptor in the final *O*-glycosylation step. Structures of reagents, products, catalysts, proposed intermediates, and transition states were built with GaussView6.0 and pre-optimized at B3LYP/def2-SV(P) level of theory with Grimme's empirical dispersion D3(BJ), and the pre-optimized structures were subjected to geometry optimization and frequency analysis at MN15-L/def2-TZVP/SMD (solvent = dichloromethane) level of theory. Accurate electronic energy is calculated from the optimized structures at MN15-L/def2-TZVPP/SMD (solvent = dichloromethane) level of theory. MN15-L is a recent Minnesota family functional specifically parameterized for the thermochemistry of organometallic systems containing transition metals. Gibbs free energies of the intermediates were calculated as the sum of thermal corrections derived from frequency analysis at 298K and the accurate electronic energy.

### Calculated coordinates and energies of the optimized structures

Charge and spin multiplicity reported as used in DFT computations in the line following the compound name, electronic energies, and thermal corrections reported in atomic units (a.u.):

#### Reagents

##### Glucal (1a)

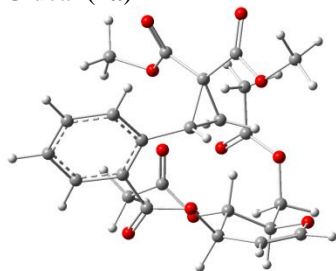

0 1

Electronic energy: -1756.841129

Thermal corrections: 0.412323

|   |             |             |             |
|---|-------------|-------------|-------------|
| O | -2.99064800 | -1.12933200 | -0.21079700 |
| C | -1.78873400 | -0.23684500 | -2.16027400 |
| C | -3.71017400 | 0.96517300  | -1.04386300 |
| C | -1.74950100 | 1.02752000  | -2.97108500 |
| H | -2.28321000 | -1.08539300 | -2.67012100 |
| H | -4.41700500 | 0.47645000  | -1.75125800 |
| C | -2.43151500 | 2.12966000  | -2.62258800 |
| H | -1.07878700 | 1.06642800  | -3.83154700 |
| O | -3.30987000 | 2.22149000  | -1.59356600 |
| C | -4.43201100 | 1.25924400  | 0.27089600  |
| H | -4.94747600 | 0.36009600  | 0.64028800  |
| H | -5.15445300 | 2.07701000  | 0.11341700  |
| H | -2.35064900 | 3.07862500  | -3.16153200 |
| O | -0.40166700 | -0.58694000 | -1.91872400 |
| O | -3.46963300 | 1.71408400  | 1.23015700  |
| C | -2.49028400 | 0.05929100  | -0.82802500 |
| H | -1.77817600 | 0.57894700  | -0.16327400 |
| C | -3.22168200 | 0.91841400  | 2.30358000  |
| C | -2.24195600 | -1.71134900 | 0.76059900  |
| O | -1.18675700 | -1.26412000 | 1.15315700  |
| O | -3.87245000 | -0.06144400 | 2.58528200  |
| C | -2.91948700 | -2.96084500 | 1.24667000  |
| H | -3.92579000 | -2.70407400 | 1.61323300  |
| H | -3.02409500 | -3.65621200 | 0.39847300  |
| H | -2.32698000 | -3.41881900 | 2.04712500  |

|   |             |             |             |
|---|-------------|-------------|-------------|
| C | -2.00703900 | 1.41508000  | 3.04704400  |
| H | -2.01406500 | 1.02819500  | 4.07352200  |
| H | -1.11468500 | 1.01619500  | 2.52861300  |
| H | -1.94969000 | 2.51254500  | 3.03347000  |
| C | -0.13592600 | -1.85772100 | -1.55962400 |
| O | -0.96351700 | -2.74704400 | -1.59242300 |
| C | 1.29767600  | -2.07034800 | -1.16527000 |
| C | 1.66760700  | -3.42928300 | -1.07128400 |
| C | 2.27303100  | -1.06634400 | -0.93219000 |
| C | 2.97735100  | -3.81489700 | -0.79728200 |
| H | 0.88686600  | -4.17514200 | -1.24033100 |
| C | 3.59641600  | -1.48176500 | -0.68278400 |
| C | 3.95591300  | -2.82898200 | -0.62168300 |
| H | 3.23603600  | -4.87569200 | -0.73441600 |
| H | 4.35215900  | -0.71040100 | -0.49881900 |
| H | 4.99533600  | -3.10464600 | -0.41926900 |
| C | 2.05861200  | 0.42935100  | -0.91398200 |
| H | 2.43930100  | 0.94497900  | -1.80306100 |
| C | 0.98963900  | 1.13946900  | -0.17463600 |
| H | 0.59900200  | 2.05952700  | -0.62069200 |
| H | 0.29032600  | 0.53418800  | 0.40164600  |
| C | 2.40509900  | 1.19573600  | 0.39655400  |
| C | 2.74605900  | 0.29780300  | 1.56001900  |
| C | 3.14128800  | 2.49996700  | 0.33772800  |
| O | 3.71453800  | 3.02198500  | 1.26362100  |
| O | 3.02950900  | 3.06975800  | -0.88571100 |
| O | 3.84801800  | 0.17576100  | 2.04021100  |
| C | 3.63600800  | 4.36345800  | -0.98681400 |
| H | 4.71534400  | 4.30118600  | -0.77484800 |
| H | 3.46177900  | 4.69545300  | -2.01914400 |
| H | 3.17665200  | 5.06317100  | -0.26989900 |
| O | 1.68057100  | -0.44638300 | 1.90764100  |
| C | 1.96747100  | -1.59872600 | 2.70712800  |
| H | 2.42901400  | -1.30873800 | 3.66447700  |
| H | 0.99753000  | -2.09031500 | 2.86259900  |
| H | 2.65780600  | -2.26445000 | 2.15755400  |

### Methanol (MeOH)

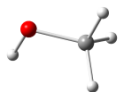

0 1

Electronic energy: -115.643892

Thermal corrections: 0.028123

|   |             |             |             |
|---|-------------|-------------|-------------|
| C | 0.65915800  | -0.01929900 | 0.00001800  |
| H | 1.03571700  | -0.54194900 | 0.90303700  |
| H | 1.03438700  | -0.55562900 | -0.89542800 |
| H | 1.08550600  | 0.99600600  | -0.00811400 |
| O | -0.74729800 | 0.12253600  | 0.00003700  |
| H | -1.13217600 | -0.76292500 | 0.00010200  |

### Cu(OTf)<sub>2</sub>

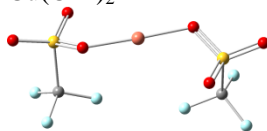

0 2

Electronic energy: -3563.173710

Thermal corrections: 0.005451

|    |             |             |             |
|----|-------------|-------------|-------------|
| S  | -2.85303900 | 0.65045600  | -0.18579700 |
| O  | -2.56413500 | 0.75096000  | -1.59185800 |
| O  | -4.15766500 | 1.01453000  | 0.28356300  |
| C  | -2.71297600 | -1.15881800 | 0.17345200  |
| F  | -2.93997400 | -1.41731700 | 1.46215300  |
| F  | -1.49078900 | -1.60970700 | -0.12780800 |
| F  | -3.59681600 | -1.85249500 | -0.54775900 |
| O  | -1.76919100 | 1.19616900  | 0.68106900  |
| Cu | -0.00002200 | 1.15630000  | -0.00004500 |
| O  | 1.76915300  | 1.19610200  | -0.68118700 |
| S  | 2.85293200  | 0.65050800  | 0.18584200  |
| O  | 4.15759700  | 1.01472900  | -0.28329400 |
| O  | 2.56378000  | 0.75095100  | 1.59185900  |
| C  | 2.71311100  | -1.15877300 | -0.17345900 |
| F  | 2.94038700  | -1.41723100 | -1.46212000 |
| F  | 3.59687300  | -1.85238300 | 0.54791400  |
| F  | 1.49090300  | -1.60976800 | 0.12755400  |

Sc(OTf)<sub>3</sub>

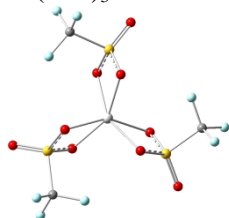

0 1

Electronic energy: -3644.676415

Thermal corrections: 0.025834

|    |             |             |             |
|----|-------------|-------------|-------------|
| Sc | 0.00216400  | -0.00144300 | -0.32253500 |
| O  | -1.77429500 | -0.41918300 | 0.80916300  |
| O  | 0.52135100  | 1.74590200  | 0.80776700  |
| O  | 1.25165500  | -1.33140500 | 0.80879300  |
| S  | -2.44204800 | -1.26901700 | -0.27014600 |
| S  | 0.11891400  | 2.74907900  | -0.27224600 |
| S  | 2.32455000  | -1.47993700 | -0.26888600 |
| O  | -1.40148100 | -1.20150100 | -1.39056100 |
| O  | 1.02853300  | 3.82075900  | -0.59157300 |
| O  | -0.33739000 | 1.81403300  | -1.39410500 |
| O  | 1.74597200  | -0.61289500 | -1.38918200 |
| O  | 2.79871200  | -2.80216600 | -0.59225500 |
| C  | -1.47575100 | 3.49788100  | 0.36617200  |
| C  | 3.77084700  | -0.47219600 | 0.36731000  |
| C  | -2.29887900 | -3.02459000 | 0.36547500  |
| O  | -3.82384100 | -1.01432200 | -0.59216900 |
| F  | 4.22158900  | -1.02556800 | 1.47946100  |
| F  | 4.71677200  | -0.46623100 | -0.55571300 |
| F  | 3.36203400  | 0.76409800  | 0.60743600  |
| F  | -1.22175500 | 4.13429900  | 1.49618700  |
| F  | -1.94072400 | 4.34186200  | -0.53803000 |
| F  | -2.35255500 | 2.52829700  | 0.57639100  |
| F  | -2.99886100 | -3.13129100 | 1.48134800  |
| F  | -1.02429400 | -3.29510400 | 0.60037600  |
| F  | -2.77544200 | -3.84725400 | -0.55268900 |

Fe(OTf)<sub>3</sub>

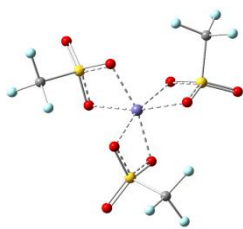

0 6

Electronic energy: -4146.455570

Thermal corrections: 0.028901

|    |             |             |             |
|----|-------------|-------------|-------------|
| O  | -1.09299900 | 1.47982700  | 0.57610800  |
| O  | 1.82328800  | 0.20542000  | 0.57813200  |
| O  | -0.73725900 | -1.68410200 | 0.57459000  |
| S  | -2.22049500 | 1.37035100  | -0.42232200 |
| S  | 2.29508600  | 1.23340700  | -0.42195600 |
| S  | -0.07667000 | -2.60436700 | -0.42379200 |
| O  | -1.79653800 | 0.29172500  | -1.38954600 |
| O  | 3.63814900  | 1.10092700  | -0.96375400 |
| O  | 1.14857200  | 1.40879500  | -1.38781100 |
| O  | 0.64717600  | -1.69682900 | -1.38843900 |
| O  | -0.85710100 | -3.70461200 | -0.96729200 |
| C  | 2.34904800  | 2.83130000  | 0.54523400  |
| C  | 1.28153400  | -3.44464700 | 0.54665600  |
| C  | -3.62734500 | 0.61293800  | 0.54686500  |
| O  | -2.78234000 | 2.59794100  | -0.96311900 |
| F  | 0.73519600  | -4.25063300 | 1.46248400  |
| F  | 2.02518700  | -4.18552100 | -0.27918200 |
| F  | 2.06267900  | -2.56888800 | 1.15995500  |
| F  | 3.31500100  | 2.75789400  | 1.46648100  |
| F  | 2.63003600  | 3.84152700  | -0.28185800 |
| F  | 1.19829800  | 3.07839800  | 1.15110900  |
| F  | -4.05075600 | 1.48669400  | 1.46568200  |
| F  | -3.26007100 | -0.50349700 | 1.15613200  |
| F  | -4.64174300 | 0.34316300  | -0.27891200 |
| Fe | -0.00146800 | 0.00104800  | -0.38813000 |

## Products

Glycoside Product  $\alpha$

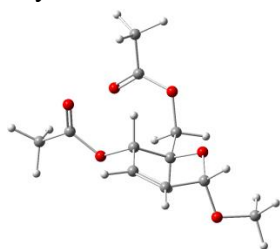

0 1

Electronic energy: -879.685306

Thermal corrections: 0.222459

|   |             |             |             |
|---|-------------|-------------|-------------|
| O | 0.93542800  | 1.29609900  | -0.63859700 |
| C | -0.92080600 | 1.78877000  | 0.83616900  |
| C | -0.83835900 | -0.30529100 | -0.48634700 |
| C | -2.22899900 | 1.56186300  | 0.98675000  |
| H | -0.45951800 | 2.74877100  | 1.09564900  |
| H | -1.30303200 | 0.18628700  | -1.36952700 |
| H | -2.91691900 | 2.33088400  | 1.35042200  |
| O | -1.84449300 | -0.77003600 | 0.40661600  |
| C | -0.02554700 | -1.50135500 | -0.97397500 |

|   |             |             |             |
|---|-------------|-------------|-------------|
| H | 0.62726800  | -1.20247700 | -1.80870700 |
| H | -0.71264200 | -2.30336900 | -1.29129300 |
| O | 0.76499800  | -2.03310600 | 0.10030400  |
| C | -0.00768600 | 0.72428400  | 0.28355900  |
| H | 0.54084400  | 0.22726400  | 1.10604500  |
| C | 2.09048000  | -1.75439500 | 0.08295200  |
| C | 2.16040300  | 1.59486900  | -0.13744500 |
| O | 2.45036100  | 1.48567400  | 1.03234800  |
| O | 2.66887900  | -1.24531600 | -0.85110800 |
| C | 3.08695800  | 2.03334000  | -1.24210000 |
| H | 3.42896600  | 1.12268200  | -1.76117800 |
| H | 2.56123800  | 2.66488700  | -1.97261900 |
| H | 3.95208700  | 2.55652300  | -0.81678500 |
| C | 2.72585300  | -2.11265300 | 1.40290300  |
| H | 3.78638600  | -2.35219200 | 1.25378600  |
| H | 2.66287200  | -1.21263900 | 2.04061900  |
| H | 2.19361600  | -2.93287300 | 1.90339800  |
| C | -2.82754900 | 0.21055500  | 0.66709700  |
| H | -3.39305400 | -0.19820500 | 1.53561200  |
| O | -3.69916300 | 0.38572200  | -0.42159200 |
| C | -4.42885200 | -0.79038700 | -0.72765000 |
| H | -5.16650700 | -0.52159700 | -1.49784800 |
| H | -3.76767400 | -1.59002700 | -1.11255500 |
| H | -4.95738700 | -1.17380900 | 0.16973900  |

#### Glycoside Product $\beta$

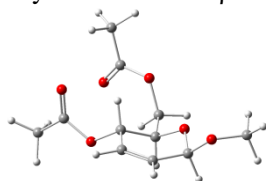

0 1

Electronic energy: -879.682601

Thermal corrections: 0.222125

|   |             |             |             |
|---|-------------|-------------|-------------|
| O | -1.18641800 | -1.31740400 | -0.59998300 |
| C | 0.86009400  | -1.87292800 | 0.57505200  |
| C | 0.69540400  | 0.13257300  | -0.88444500 |
| C | 2.18620400  | -1.77695100 | 0.43802200  |
| H | 0.38164300  | -2.74473800 | 1.03642100  |
| H | 0.91050000  | -0.45195500 | -1.81109600 |
| H | 2.87139100  | -2.56737500 | 0.75952900  |
| O | 1.90266000  | 0.52987500  | -0.26128300 |
| C | -0.10114000 | 1.37276500  | -1.28832700 |
| H | -0.92639100 | 1.08887800  | -1.95973600 |
| H | 0.56955400  | 2.09202900  | -1.78543300 |
| O | -0.62231700 | 2.02759400  | -0.12252300 |
| C | -0.05327000 | -0.77301600 | 0.10115000  |
| H | -0.41209500 | -0.18113600 | 0.96324800  |
| C | -1.94304600 | 1.86216600  | 0.13322400  |
| C | -2.31744100 | -1.48726900 | 0.13014500  |
| O | -2.37777000 | -1.29895000 | 1.32391300  |
| O | -2.72766300 | 1.35325800  | -0.63573600 |
| C | -3.46182300 | -1.89692500 | -0.76074800 |
| H | -3.82110000 | -0.98672100 | -1.26892200 |
| H | -3.12942500 | -2.60815400 | -1.53059800 |
| H | -4.27260300 | -2.31999800 | -0.15524000 |
| C | -2.28049400 | 2.34372100  | 1.52156400  |

|   |             |             |             |
|---|-------------|-------------|-------------|
| H | -3.32576900 | 2.67620100  | 1.55723700  |
| H | -2.17419200 | 1.47318800  | 2.19361600  |
| H | -1.59437300 | 3.13192600  | 1.85961100  |
| O | 3.89093100  | -0.16518800 | 0.61468100  |
| C | 4.62932700  | 0.90969100  | 0.05428800  |
| H | 5.53168000  | 1.03159900  | 0.67079700  |
| H | 4.92617700  | 0.67758700  | -0.98993300 |
| H | 4.04674300  | 1.84771600  | 0.05991500  |
| C | 2.82021900  | -0.55041300 | -0.17518000 |
| H | 3.17867200  | -0.77301700 | -1.22042600 |

TfOH

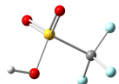

0 1

Electronic energy: -961.822763

Thermal corrections: 0.007241

|   |             |             |             |
|---|-------------|-------------|-------------|
| S | -0.85818900 | -0.13588100 | -0.00000200 |
| O | -1.26619600 | -0.69774100 | -1.24247100 |
| O | -1.26621800 | -0.69765200 | 1.24250200  |
| C | 0.99338600  | -0.00560000 | 0.00000500  |
| F | 1.40785900  | 0.63485500  | 1.08005600  |
| F | 1.40786900  | 0.63480900  | -1.08007000 |
| F | 1.47881500  | -1.23658500 | 0.00003300  |
| O | -1.07419000 | 1.43038000  | -0.00005500 |
| H | -2.02734500 | 1.63009000  | 0.00002800  |

CCBz ring opening leaving group

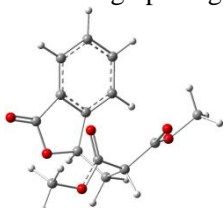

0 1

Electronic energy: -992.824106

Thermal corrections: 0.206330

|   |             |             |             |
|---|-------------|-------------|-------------|
| O | -1.48299100 | -1.01260600 | 1.28943800  |
| C | -1.33554000 | -1.91938100 | 0.26758900  |
| O | -2.26721200 | -2.49747100 | -0.21742400 |
| C | 0.11028400  | -1.99123700 | -0.04107400 |
| C | 0.76757700  | -2.75802200 | -1.00150900 |
| C | 0.79198400  | -1.12382600 | 0.80937700  |
| C | 2.15677900  | -2.64251400 | -1.08371300 |
| H | 0.20061100  | -3.41946200 | -1.66125200 |
| C | 2.18033600  | -1.02001900 | 0.74567000  |
| C | 2.85320900  | -1.78628700 | -0.21359700 |
| H | 2.71108400  | -3.22331200 | -1.82637000 |
| H | 2.73139000  | -0.35769100 | 1.41609200  |
| H | 3.94290600  | -1.71838300 | -0.28724100 |
| C | -0.22081800 | -0.46791200 | 1.71947500  |
| H | -0.06820700 | -0.80673100 | 2.76078200  |
| C | -0.30983100 | 1.06229200  | 1.75701300  |
| H | -1.20313600 | 1.29996500  | 2.35672100  |
| H | 0.56539200  | 1.45120400  | 2.29944500  |
| C | -1.47992300 | 1.17745500  | -0.49352500 |

|   |             |             |             |
|---|-------------|-------------|-------------|
| C | 0.86749700  | 2.06432600  | -0.35251400 |
| O | 0.92278300  | 2.38997000  | -1.50759800 |
| O | 1.95283300  | 1.97392000  | 0.44200900  |
| O | -1.25199400 | 0.42578600  | -1.40487700 |
| C | 3.20672100  | 2.22275100  | -0.19108200 |
| H | 3.39240600  | 1.47246500  | -0.97761300 |
| H | 3.22047400  | 3.22643500  | -0.64651000 |
| H | 3.96671000  | 2.14722700  | 0.60020500  |
| O | -2.70743400 | 1.52111900  | -0.08553400 |
| C | -3.79150900 | 0.82207900  | -0.70971000 |
| H | -3.78470100 | 0.99533100  | -1.79811700 |
| H | -3.70657900 | -0.25915200 | -0.51273000 |
| H | -4.70751100 | 1.22956100  | -0.25877200 |
| C | -0.42815000 | 1.81553600  | 0.41215300  |
| H | -0.80041900 | 2.82535000  | 0.65992200  |

## Intermediates and Transition States

### I. Activation of the glycal donor through CCBz ring opening

#### II Cu-Catalyzed ring opening without coordination

#### IM1

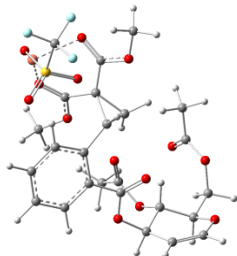

1 2

Electronic energy: -4357.809783

Thermal corrections: 0.427682

|   |             |             |             |
|---|-------------|-------------|-------------|
| O | 2.52758800  | -3.28315200 | -0.29945300 |
| C | 1.82527000  | -1.61786700 | -1.86329900 |
| C | 0.35202100  | -3.58040400 | -1.28092900 |
| C | 0.60886700  | -1.04618600 | -2.54216700 |
| H | 2.43110600  | -2.20840100 | -2.57256000 |
| H | 0.89634300  | -4.29101000 | -1.93039400 |
| C | -0.55164300 | -1.78469700 | -2.60639800 |
| H | 0.75933800  | -0.21154600 | -3.23309900 |
| O | -0.70453600 | -3.00168200 | -2.05853500 |
| C | -0.36018000 | -4.35909200 | -0.17693400 |
| H | 0.36307900  | -4.82890200 | 0.50262400  |
| H | -1.00787000 | -5.12145500 | -0.63446800 |
| H | -1.38937200 | -1.53395000 | -3.26401900 |
| O | 2.68610500  | -0.50131000 | -1.53836000 |
| O | -1.15078300 | -3.45820700 | 0.58244100  |
| C | 1.37832300  | -2.55853400 | -0.73816700 |
| H | 0.93774700  | -2.00993400 | 0.10042300  |
| C | -2.50059300 | -3.46247500 | 0.36574600  |
| C | 2.70704700  | -3.46430100 | 1.03410200  |
| O | 1.83806000  | -3.31196100 | 1.85150800  |
| O | -3.05600200 | -4.29078700 | -0.30651300 |
| C | 4.12666400  | -3.86883500 | 1.32654200  |
| H | 4.51225900  | -4.55487200 | 0.55549000  |
| H | 4.74785300  | -2.95506300 | 1.30934000  |
| H | 4.18748100  | -4.32606100 | 2.32472500  |
| C | -3.15414500 | -2.30835900 | 1.07149000  |

|    |             |             |             |
|----|-------------|-------------|-------------|
| H  | -4.24640000 | -2.40429000 | 1.00072700  |
| H  | -2.83954300 | -2.27840700 | 2.12713800  |
| H  | -2.83966200 | -1.36033200 | 0.60393200  |
| C  | 2.97622400  | -0.04917900 | -0.31085800 |
| O  | 2.82338600  | -0.68205000 | 0.70893000  |
| C  | 3.52670000  | 1.34372800  | -0.34878800 |
| C  | 4.30224000  | 1.76792900  | -1.43451300 |
| C  | 3.23741100  | 2.24173100  | 0.70941500  |
| C  | 4.82160500  | 3.06362300  | -1.47234600 |
| H  | 4.49469800  | 1.07157000  | -2.25313000 |
| C  | 3.74401400  | 3.54274500  | 0.64210900  |
| C  | 4.54089100  | 3.95168800  | -0.43157300 |
| H  | 5.43615900  | 3.38140600  | -2.31926100 |
| H  | 3.50537900  | 4.24602000  | 1.44382600  |
| H  | 4.93532200  | 4.97167600  | -0.45727600 |
| C  | 2.31888100  | 1.81583700  | 1.80780200  |
| H  | 2.64487800  | 0.92004500  | 2.33779600  |
| C  | 1.34819700  | 2.67796100  | 2.53516800  |
| H  | 1.12443700  | 2.40197500  | 3.56758000  |
| H  | 1.28733500  | 3.74342800  | 2.30495200  |
| C  | 0.79967200  | 1.76284400  | 1.46357500  |
| C  | 0.16896500  | 0.44590700  | 1.78303900  |
| C  | 0.43576500  | 2.37157100  | 0.14314500  |
| O  | 0.28885200  | 1.73209100  | -0.89005400 |
| O  | 0.39018100  | 3.68637400  | 0.16259400  |
| O  | -0.27533500 | -0.33840500 | 0.96341200  |
| C  | 0.02434600  | 4.34380100  | -1.06519700 |
| H  | -0.99740600 | 4.03815700  | -1.34175900 |
| H  | 0.07382800  | 5.41838400  | -0.84273800 |
| H  | 0.73684800  | 4.07502900  | -1.86124800 |
| O  | 0.23373100  | 0.16207900  | 3.07382900  |
| C  | -0.20650600 | -1.14925100 | 3.46936600  |
| H  | 0.32727600  | -1.92136600 | 2.89477700  |
| H  | 0.02225500  | -1.22043400 | 4.54161900  |
| H  | -1.29024200 | -1.23679600 | 3.29933600  |
| Cu | -0.65688600 | -0.11638200 | -1.20326200 |
| O  | -2.58489200 | 0.40059300  | -0.93464300 |
| S  | -2.89065200 | 1.74439100  | -0.29800900 |
| O  | -2.92457700 | 2.85643200  | -1.25637200 |
| O  | -2.16800300 | 1.97704200  | 0.96844000  |
| C  | -4.66462100 | 1.49104800  | 0.21688400  |
| F  | -5.13336800 | 2.61040700  | 0.76549700  |
| F  | -4.75188600 | 0.50816300  | 1.11807200  |
| F  | -5.41871300 | 1.17655000  | -0.83275400 |

### TS1

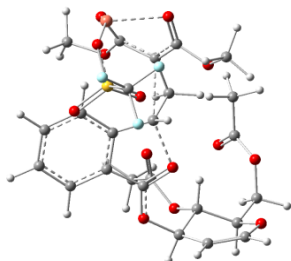

1 2

Electronic energy: -4357.747158

Thermal corrections: 0.427805



|   |             |             |             |
|---|-------------|-------------|-------------|
| O | -5.15958700 | -0.21838600 | 1.06216200  |
| C | -3.88987000 | -2.28682600 | 1.05456400  |
| C | -5.49505700 | -1.71558500 | -0.78140000 |
| C | -3.52019700 | -3.43820000 | 0.17217000  |
| H | -4.60711300 | -2.57374600 | 1.83925700  |
| H | -6.30673600 | -2.24154600 | -0.24095000 |
| C | -3.99482700 | -3.52344700 | -1.07972300 |
| H | -2.84769100 | -4.20767700 | 0.55708100  |
| O | -4.85820500 | -2.65468300 | -1.64829900 |
| C | -6.12453500 | -0.63223000 | -1.64172800 |
| H | -6.80655700 | -0.01713800 | -1.03873100 |
| H | -6.67374000 | -1.11053600 | -2.46771500 |
| H | -3.72370100 | -4.32724700 | -1.76989700 |
| O | -2.77538200 | -1.80237100 | 1.86424300  |
| O | -5.11630100 | 0.19457500  | -2.22158700 |
| C | -4.48784700 | -1.15454700 | 0.22398800  |
| H | -3.69059000 | -0.65033500 | -0.33308200 |
| C | -5.06221200 | 1.49911400  | -1.85271100 |
| C | -4.50087600 | 0.93321200  | 1.36604600  |
| O | -3.36182200 | 1.14075000  | 1.02749800  |
| O | -5.85541700 | 2.00785100  | -1.09866300 |
| C | -5.38549700 | 1.88505300  | 2.11572000  |
| H | -5.98414300 | 2.43021700  | 1.36412000  |
| H | -6.07343800 | 1.34800300  | 2.78707800  |
| H | -4.76723400 | 2.60319100  | 2.67367600  |
| C | -3.87066600 | 2.18313100  | -2.46164900 |
| H | -4.04213800 | 3.26888200  | -2.49250500 |
| H | -2.99718100 | 1.98446900  | -1.81524200 |
| H | -3.64996400 | 1.78696600  | -3.46464800 |
| C | -1.70840500 | -1.27833600 | 1.30895700  |
| O | -1.50569900 | -1.24434400 | 0.08089500  |
| C | -0.68700300 | -0.69135700 | 2.16041200  |
| C | -0.60767000 | -0.73753000 | 3.55577600  |
| C | 0.30252800  | -0.07882000 | 1.36836800  |
| C | 0.51142800  | -0.18052900 | 4.17074300  |
| H | -1.39894200 | -1.22114900 | 4.13298500  |
| C | 1.42500100  | 0.46013900  | 1.99686800  |
| C | 1.52131000  | 0.40073500  | 3.38940400  |
| H | 0.61518400  | -0.21677400 | 5.25837600  |
| H | 2.23289800  | 0.89747900  | 1.41475200  |
| H | 2.41971800  | 0.79786100  | 3.86890000  |
| C | 0.03452300  | -0.14675900 | -0.09535900 |
| H | 0.64190700  | -0.86670800 | -0.65255600 |
| C | -0.46342900 | 1.01233900  | -0.88141600 |
| H | -0.90738100 | 0.68017200  | -1.82903100 |
| H | -1.16341000 | 1.63220700  | -0.30962100 |
| C | 0.88440800  | 1.67252600  | -1.07151300 |
| C | 1.31175000  | 2.69881300  | -0.17880100 |
| C | 1.78893900  | 1.16991600  | -2.07921200 |
| O | 2.92858700  | 1.57342900  | -2.31557600 |
| O | 1.27018300  | 0.13502900  | -2.78370300 |
| O | 2.46950100  | 3.15271000  | -0.03687600 |
| C | 2.19495000  | -0.57062200 | -3.60995000 |
| H | 3.02113400  | -0.96093000 | -2.99457500 |
| H | 1.62312400  | -1.39647800 | -4.05920500 |
| H | 2.60176600  | 0.08671100  | -4.39581500 |
| O | 0.33135100  | 3.17318900  | 0.62335900  |

|    |             |             |             |
|----|-------------|-------------|-------------|
| C  | 0.72008200  | 4.07077900  | 1.65366400  |
| H  | 1.16668500  | 4.98733200  | 1.23443000  |
| H  | -0.20172200 | 4.31036000  | 2.20423900  |
| H  | 1.45383600  | 3.59813900  | 2.32930900  |
| Cu | 3.91052800  | 1.82655200  | -0.36007800 |
| O  | 4.97218100  | 0.27525200  | 0.08271900  |
| S  | 4.18447500  | -0.98795400 | 0.38362400  |
| O  | 2.91708100  | -1.07975800 | -0.37562200 |
| O  | 4.12949400  | -1.32731300 | 1.80655000  |
| C  | 5.27638000  | -2.27275700 | -0.40798100 |
| F  | 5.37311100  | -2.05053000 | -1.72186400 |
| F  | 6.49642400  | -2.24938600 | 0.12112100  |
| F  | 4.75063900  | -3.48466100 | -0.22198500 |

## IM2

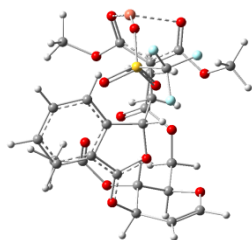

1 2

Electronic energy: -4357.758453

Thermal corrections: 0.426589

|   |             |             |             |
|---|-------------|-------------|-------------|
| O | -5.05001900 | -0.53217200 | 0.82820800  |
| C | -3.94260100 | -2.57980100 | 0.13076600  |
| C | -5.13348400 | -1.07557800 | -1.49968500 |
| C | -3.58948000 | -3.36352400 | -1.08931800 |
| H | -4.76358200 | -3.03075700 | 0.70727000  |
| H | -6.08556200 | -1.62147300 | -1.34897600 |
| C | -3.82365100 | -2.86889800 | -2.31528300 |
| H | -3.11932600 | -4.34225700 | -0.97378300 |
| O | -4.43458000 | -1.69771000 | -2.57889800 |
| C | -5.46623700 | 0.35070100  | -1.90783600 |
| H | -6.17589800 | 0.78705400  | -1.19133900 |
| H | -5.90747600 | 0.33132500  | -2.91691900 |
| H | -3.53825500 | -3.38960100 | -3.23390100 |
| O | -2.86783600 | -2.58985400 | 1.15357200  |
| O | -4.29291100 | 1.15914100  | -1.97563800 |
| C | -4.30009500 | -1.13470500 | -0.21947600 |
| H | -3.38521800 | -0.55855600 | -0.39788500 |
| C | -4.18519500 | 2.21068500  | -1.11815200 |
| C | -4.37667100 | 0.29192200  | 1.68067200  |
| O | -3.17866200 | 0.42130900  | 1.64355600  |
| O | -5.00959200 | 2.44678400  | -0.26758000 |
| C | -5.31546200 | 1.01051300  | 2.60219900  |
| H | -5.67531400 | 1.90242400  | 2.05865000  |
| H | -6.18291700 | 0.38385500  | 2.86126500  |
| H | -4.77515200 | 1.33279700  | 3.50417300  |
| C | -2.93916000 | 3.01377000  | -1.36370200 |
| H | -3.22958300 | 4.06255100  | -1.54725800 |
| H | -2.31011800 | 2.99902200  | -0.45707800 |
| H | -2.35878900 | 2.62827400  | -2.21265200 |
| C | -1.73818400 | -1.99906900 | 0.93600700  |
| O | -1.36761300 | -1.68324600 | -0.25895700 |

|    |             |             |             |
|----|-------------|-------------|-------------|
| C  | -0.81116000 | -1.57431400 | 1.93663600  |
| C  | -0.80336300 | -1.74927500 | 3.32880900  |
| C  | 0.15696400  | -0.80609800 | 1.25741900  |
| C  | 0.23428100  | -1.15354000 | 4.03427800  |
| H  | -1.57657900 | -2.33928600 | 3.82581200  |
| C  | 1.17827700  | -0.19501800 | 1.97960700  |
| C  | 1.21165700  | -0.38990000 | 3.36107200  |
| H  | 0.30015200  | -1.27728300 | 5.11838500  |
| H  | 1.93860600  | 0.40408600  | 1.48624000  |
| H  | 2.03148900  | 0.05559400  | 3.93062000  |
| C  | -0.16879800 | -0.78866300 | -0.20106900 |
| H  | 0.60622700  | -1.25689300 | -0.82384900 |
| C  | -0.62110800 | 0.55445900  | -0.81256500 |
| H  | -1.02031700 | 0.32152300  | -1.81133100 |
| H  | -1.43005300 | 0.94168200  | -0.18252300 |
| C  | 0.52811100  | 1.51223500  | -0.87698100 |
| C  | 0.74118600  | 2.42650900  | 0.17803700  |
| C  | 1.54332600  | 1.31435200  | -1.87427700 |
| O  | 2.59965900  | 1.93835200  | -2.00510500 |
| O  | 1.25246500  | 0.28686300  | -2.72027300 |
| O  | 1.78711300  | 3.06200900  | 0.46545800  |
| C  | 2.31232500  | -0.11506300 | -3.58208900 |
| H  | 3.18686000  | -0.42061600 | -2.98619800 |
| H  | 1.92266900  | -0.96865400 | -4.15817800 |
| H  | 2.60264600  | 0.70321500  | -4.26202000 |
| O  | -0.33603400 | 2.57402200  | 1.00716400  |
| C  | -0.12839700 | 3.27928900  | 2.21878600  |
| H  | 0.14691400  | 4.33068400  | 2.03124000  |
| H  | -1.08398900 | 3.22254500  | 2.76210600  |
| H  | 0.67294700  | 2.80974100  | 2.81627600  |
| Cu | 3.43720800  | 2.06441800  | 0.04089900  |
| O  | 4.75757400  | 0.65956900  | 0.21441000  |
| S  | 4.20270700  | -0.74655400 | 0.34428600  |
| O  | 2.97776600  | -0.97520000 | -0.45459400 |
| O  | 4.19484800  | -1.25667600 | 1.71839800  |
| C  | 5.51546400  | -1.72073100 | -0.54866200 |
| F  | 5.57978200  | -1.35147400 | -1.83088000 |
| F  | 6.70760100  | -1.53220900 | 0.01068300  |
| F  | 5.21912400  | -3.02091300 | -0.49777100 |

## TS2

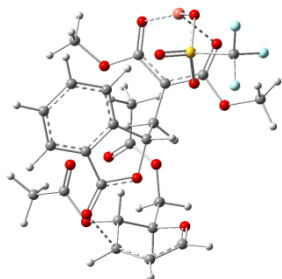

1 2

Electronic energy: -4357.736235

Thermal corrections: 0.426446

|   |             |             |             |
|---|-------------|-------------|-------------|
| O | -5.40307800 | -0.46653200 | 0.43686100  |
| C | -4.32840600 | -2.62352300 | 0.58134500  |
| C | -4.62830700 | -1.51254400 | -1.59014200 |
| C | -3.73234000 | -3.66919200 | -0.11576800 |
| H | -4.89682600 | -2.77675200 | 1.49573700  |

|    |             |             |             |
|----|-------------|-------------|-------------|
| H  | -5.56368100 | -2.08453600 | -1.73967500 |
| C  | -3.24950300 | -3.42492200 | -1.39344500 |
| H  | -3.55183900 | -4.63862400 | 0.35180000  |
| O  | -3.56200000 | -2.36814800 | -2.09999600 |
| C  | -4.71212200 | -0.26590400 | -2.44335400 |
| H  | -5.66669000 | 0.23991500  | -2.23477400 |
| H  | -4.68073100 | -0.57058100 | -3.50314900 |
| H  | -2.59460800 | -4.11599300 | -1.93492400 |
| O  | -2.88667400 | -2.11213800 | 2.27374500  |
| O  | -3.63759500 | 0.62787700  | -2.21185700 |
| C  | -4.38483000 | -1.28907100 | -0.09832300 |
| H  | -3.40647700 | -0.78934800 | 0.01204200  |
| C  | -3.94655300 | 1.89350800  | -1.79158100 |
| C  | -4.99367600 | 0.68539900  | 1.06545100  |
| O  | -3.83378000 | 0.96317800  | 1.21083000  |
| O  | -5.07842100 | 2.22660700  | -1.53753800 |
| C  | -6.17000900 | 1.52080300  | 1.47056900  |
| H  | -6.45848200 | 2.12051800  | 0.58840000  |
| H  | -7.02547000 | 0.89472300  | 1.76756700  |
| H  | -5.87567700 | 2.20141500  | 2.28254600  |
| C  | -2.72905500 | 2.75671800  | -1.67640400 |
| H  | -3.00102100 | 3.79376200  | -1.92746400 |
| H  | -2.37202800 | 2.73873500  | -0.63164700 |
| H  | -1.90501500 | 2.39479500  | -2.30784700 |
| C  | -1.82844500 | -1.60831100 | 1.90622400  |
| O  | -1.39892700 | -1.73447100 | 0.64502100  |
| C  | -0.86427000 | -0.80852100 | 2.66000500  |
| C  | -0.84403500 | -0.46970500 | 4.01601900  |
| C  | 0.13669200  | -0.40521700 | 1.76842400  |
| C  | 0.23633600  | 0.28392700  | 4.47193200  |
| H  | -1.64338100 | -0.79897300 | 4.68457700  |
| C  | 1.22119100  | 0.33974400  | 2.22839900  |
| C  | 1.25845300  | 0.67256500  | 3.58519900  |
| H  | 0.30192400  | 0.56355600  | 5.52715400  |
| H  | 2.02694400  | 0.63399000  | 1.56139300  |
| H  | 2.11494200  | 1.23677300  | 3.96492100  |
| C  | -0.22838400 | -0.88456200 | 0.39463100  |
| H  | 0.54893000  | -1.51045800 | -0.06462400 |
| C  | -0.69259700 | 0.21445400  | -0.58171100 |
| H  | -1.11802600 | -0.29635800 | -1.45779700 |
| H  | -1.49834100 | 0.76435700  | -0.07838800 |
| C  | 0.42411300  | 1.13149900  | -0.98224200 |
| C  | 0.68784500  | 2.30361800  | -0.23327800 |
| C  | 1.36482400  | 0.69045600  | -1.96859900 |
| O  | 2.39409400  | 1.27365500  | -2.34104700 |
| O  | 1.04983900  | -0.51682600 | -2.50554700 |
| O  | 1.73365000  | 3.00118700  | -0.21573000 |
| C  | 2.05973100  | -1.11271700 | -3.31236300 |
| H  | 2.98877500  | -1.22705700 | -2.73233900 |
| H  | 1.66598400  | -2.09866300 | -3.60474300 |
| H  | 2.26380400  | -0.50366500 | -4.20923500 |
| O  | -0.32609700 | 2.67067800  | 0.60131800  |
| C  | -0.04618000 | 3.69413900  | 1.54332300  |
| H  | 0.19106500  | 4.64724500  | 1.04181200  |
| H  | -0.95753200 | 3.79683800  | 2.15172900  |
| H  | 0.80543600  | 3.41215400  | 2.18589400  |
| Cu | 3.38647400  | 1.97202600  | -0.58412300 |

|   |            |             |             |
|---|------------|-------------|-------------|
| O | 4.80655000 | 0.75576600  | -0.07399900 |
| S | 4.31600500 | -0.58176500 | 0.45642400  |
| O | 3.01577200 | -0.99090900 | -0.11917100 |
| O | 4.48415900 | -0.74284600 | 1.90082900  |
| C | 5.54626600 | -1.73853900 | -0.33116600 |
| F | 5.45574700 | -1.67583100 | -1.66379000 |
| F | 6.78937700 | -1.42647300 | 0.02551500  |
| F | 5.29308100 | -2.99208800 | 0.04929600  |

### IM3

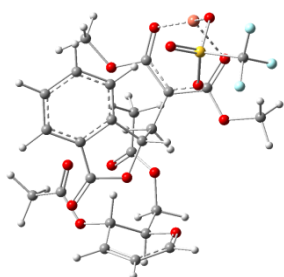

1 2

Electronic energy: -4357.736373

Thermal corrections: 0.426589

|   |             |             |             |
|---|-------------|-------------|-------------|
| O | 5.46751800  | 0.30350700  | 0.48980500  |
| C | 4.39958900  | 2.17473500  | 1.58028400  |
| C | 4.56391300  | 2.07708400  | -0.86510100 |
| C | 3.74815400  | 3.38215500  | 1.43063900  |
| H | 4.90278900  | 1.88683100  | 2.50084200  |
| H | 5.48439800  | 2.68836200  | -0.80869700 |
| C | 3.17974200  | 3.68241300  | 0.19097800  |
| H | 3.57447800  | 4.05148500  | 2.27508000  |
| O | 3.46259400  | 3.03635600  | -0.90911900 |
| C | 4.60635900  | 1.31068100  | -2.16814200 |
| H | 5.57749300  | 0.79860800  | -2.24157400 |
| H | 4.50739400  | 2.03126000  | -2.99763800 |
| H | 2.46536900  | 4.49725400  | 0.03330200  |
| O | 2.90295900  | 0.81435800  | 3.11645100  |
| O | 3.55935900  | 0.36328700  | -2.28000800 |
| C | 4.41604900  | 1.24732500  | 0.40965400  |
| H | 3.44459200  | 0.71774600  | 0.37361800  |
| C | 3.91024000  | -0.94675400 | -2.46107400 |
| C | 5.10136300  | -1.01772900 | 0.57734600  |
| O | 3.95316500  | -1.36783300 | 0.63301500  |
| O | 5.06076000  | -1.31103800 | -2.45155700 |
| C | 6.30400900  | -1.91150300 | 0.53506000  |
| H | 6.53236700  | -2.09277900 | -0.53093500 |
| H | 7.17688900  | -1.43724700 | 1.00910500  |
| H | 6.06511700  | -2.87201600 | 1.01443800  |
| C | 2.71044600  | -1.82385500 | -2.63699900 |
| H | 2.97393600  | -2.66633900 | -3.29483400 |
| H | 2.41890700  | -2.23066900 | -1.65297500 |
| H | 1.84675500  | -1.26504900 | -3.02590400 |
| C | 1.85929700  | 0.54347700  | 2.55136000  |
| O | 1.43943100  | 1.24034400  | 1.47118800  |
| C | 0.86524200  | -0.49768300 | 2.84027600  |
| C | 0.81603600  | -1.41704600 | 3.89102900  |
| C | -0.13224900 | -0.42318000 | 1.86407500  |
| C | -0.28930400 | -2.26585100 | 3.95198100  |
| H | 1.61320200  | -1.45024200 | 4.63809900  |

|    |             |             |             |
|----|-------------|-------------|-------------|
| C  | -1.24537900 | -1.25928400 | 1.93382500  |
| C  | -1.31049400 | -2.17531400 | 2.98794200  |
| H  | -0.37550400 | -2.99448500 | 4.76309700  |
| H  | -2.05263900 | -1.18456200 | 1.21005000  |
| H  | -2.18766200 | -2.82368300 | 3.06903900  |
| C  | 0.26573900  | 0.62076900  | 0.86026600  |
| H  | -0.49906600 | 1.39905300  | 0.72688100  |
| C  | 0.72451900  | 0.07166100  | -0.50593000 |
| H  | 1.14541200  | 0.91867500  | -1.06636400 |
| H  | 1.53426400  | -0.64163200 | -0.30243800 |
| C  | -0.38700600 | -0.57554600 | -1.27632700 |
| C  | -0.65891900 | -1.95863300 | -1.11146400 |
| C  | -1.30934700 | 0.25013300  | -1.99489600 |
| O  | -2.32366500 | -0.11680600 | -2.61296400 |
| O  | -1.00064500 | 1.56887000  | -1.94909700 |
| O  | -1.70467100 | -2.58813900 | -1.41050400 |
| C  | -2.00029300 | 2.45407600  | -2.44423000 |
| H  | -2.94383500 | 2.30057200  | -1.89784100 |
| H  | -1.61401400 | 3.46977500  | -2.26712200 |
| H  | -2.17321700 | 2.29534900  | -3.52206500 |
| O  | 0.34376100  | -2.65346800 | -0.51240500 |
| C  | 0.05717300  | -3.98264800 | -0.10384400 |
| H  | -0.16845400 | -4.62753600 | -0.96943300 |
| H  | 0.96168400  | -4.33585400 | 0.41363700  |
| H  | -0.80272000 | -4.00005400 | 0.58676700  |
| Cu | -3.36002300 | -1.49378400 | -1.41795700 |
| O  | -4.83549200 | -0.66345700 | -0.47171600 |
| S  | -4.37835700 | 0.30843900  | 0.60682800  |
| O  | -3.06010200 | 0.91244100  | 0.31142200  |
| O  | -4.60255100 | -0.17354200 | 1.96895100  |
| C  | -5.58874400 | 1.70234800  | 0.35452000  |
| F  | -5.45287200 | 2.22084800  | -0.87082100 |
| F  | -6.84021200 | 1.27588900  | 0.49920900  |
| F  | -5.35689000 | 2.66569400  | 1.24720200  |

### I.II Cu-Catalyzed ring opening with coordination to 3-CCBz carbonyl groups IM1'\_Cu\_α\_coordination

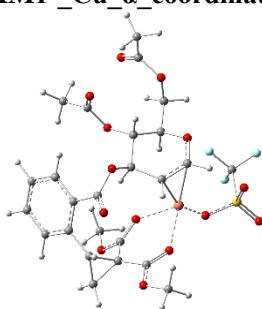

1 2

Electronic energy: -4357.817686

Thermal corrections: 0.433645

|   |             |             |             |
|---|-------------|-------------|-------------|
| O | -0.22162800 | 2.93135300  | 0.40825800  |
| C | 0.41037200  | 1.07654600  | -0.98910600 |
| C | -1.93251300 | 1.37024100  | -0.19240800 |
| C | -0.18400400 | -0.11109300 | -1.72306400 |
| H | 0.87002500  | 0.77530800  | -0.03571500 |
| H | -1.67914000 | 0.70321500  | 0.65474400  |
| C | -1.55082700 | -0.25732700 | -1.84057300 |

|    |             |             |             |
|----|-------------|-------------|-------------|
| H  | 0.46129400  | -0.62089700 | -2.44412000 |
| O  | -2.43998700 | 0.55108100  | -1.24263100 |
| C  | -3.04232100 | 2.29702600  | 0.26464500  |
| H  | -2.78470800 | 2.75217800  | 1.23026700  |
| H  | -3.96639200 | 1.70741100  | 0.36025700  |
| H  | -2.03591700 | -0.96221300 | -2.51891200 |
| O  | 1.43509600  | 1.66888500  | -1.81108700 |
| O  | -3.27136900 | 3.32435800  | -0.70173300 |
| C  | -0.66553700 | 2.09741800  | -0.66276700 |
| H  | -0.88652700 | 2.70924500  | -1.54750400 |
| C  | -3.08531400 | 4.61116800  | -0.32677000 |
| C  | 0.06354300  | 4.23351100  | 0.14691100  |
| O  | 0.01072000  | 4.71565400  | -0.95551000 |
| O  | -2.79254700 | 4.94310400  | 0.79713700  |
| C  | 0.40692800  | 4.96708600  | 1.41350100  |
| H  | -0.54673400 | 5.28309700  | 1.87280700  |
| H  | 0.94028400  | 4.31461900  | 2.12213900  |
| H  | 0.99975700  | 5.86223800  | 1.17365900  |
| C  | -3.22989100 | 5.54419600  | -1.49724800 |
| H  | -3.54115000 | 6.53793100  | -1.14211100 |
| H  | -2.23335800 | 5.63610900  | -1.96672300 |
| H  | -3.93617300 | 5.14977200  | -2.24349600 |
| C  | 2.66682200  | 1.10636200  | -1.64815900 |
| O  | 3.17673800  | 0.46110800  | -2.52777500 |
| C  | 3.31478100  | 1.40290700  | -0.32705000 |
| C  | 3.17224400  | 2.69354400  | 0.20154100  |
| C  | 4.07279000  | 0.43064600  | 0.36917400  |
| C  | 3.78878200  | 3.04129800  | 1.40425700  |
| H  | 2.58783000  | 3.42829400  | -0.35529500 |
| C  | 4.66909700  | 0.79228600  | 1.58278300  |
| C  | 4.53632900  | 2.08572900  | 2.09633700  |
| H  | 3.68491600  | 4.05588500  | 1.79843000  |
| H  | 5.25317000  | 0.05234700  | 2.13360700  |
| H  | 5.02329400  | 2.34601900  | 3.04052500  |
| C  | 4.16412300  | -0.95995600 | -0.16664000 |
| H  | 4.34703800  | -1.00593500 | -1.24115200 |
| C  | 4.54349600  | -2.16363300 | 0.61001300  |
| H  | 5.07349800  | -2.95265800 | 0.07234900  |
| H  | 4.78502200  | -2.06919600 | 1.67014000  |
| C  | 3.07110200  | -2.00348400 | 0.27123200  |
| C  | 2.46156300  | -2.77757600 | -0.85362600 |
| C  | 2.13140800  | -1.52987200 | 1.33874100  |
| O  | 0.98465600  | -1.17263700 | 1.14727300  |
| O  | 2.69674200  | -1.46671300 | 2.53920000  |
| O  | 1.27143800  | -2.89963800 | -1.06617300 |
| C  | 1.90441100  | -0.89434900 | 3.58978000  |
| H  | 0.96608900  | -1.45804100 | 3.70851100  |
| H  | 2.52171500  | -0.96236200 | 4.49570800  |
| H  | 1.67367200  | 0.15721700  | 3.35363400  |
| O  | 3.38811200  | -3.31106000 | -1.64746900 |
| C  | 2.91910700  | -3.98527800 | -2.82299700 |
| H  | 2.38403000  | -3.27668700 | -3.47568500 |
| H  | 3.81902100  | -4.36763500 | -3.32344600 |
| H  | 2.24237200  | -4.80912200 | -2.54703300 |
| Cu | -0.51503700 | -1.67068500 | -0.43996400 |
| O  | -1.58240200 | -2.91772300 | 0.62233800  |
| S  | -2.97785200 | -3.25738100 | 0.11260300  |

|   |             |             |             |
|---|-------------|-------------|-------------|
| O | -3.21007100 | -2.77235400 | -1.25809400 |
| O | -3.40795800 | -4.60509000 | 0.46765200  |
| C | -4.01392100 | -2.13279400 | 1.18796100  |
| F | -3.62602900 | -0.84841200 | 1.04732000  |
| F | -5.29949600 | -2.21097300 | 0.85362800  |
| F | -3.88525200 | -2.45488200 | 2.47480700  |

### IM1'\_Cu\_β\_coordination

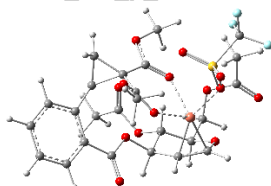

1 2

Electronic energy: -4357.817686

Thermal corrections: 0.433645

|   |             |             |             |
|---|-------------|-------------|-------------|
| O | -1.58358200 | 3.66085000  | 0.22440900  |
| C | -1.42513900 | 1.91858000  | -1.43297200 |
| C | 0.40448200  | 3.63321300  | -1.09936500 |
| C | -0.46426700 | 1.24723800  | -2.38165200 |
| H | -2.13331500 | 2.54792800  | -1.99677500 |
| H | -0.09210400 | 4.40266900  | -1.72147100 |
| C | 0.79599100  | 1.77241200  | -2.56730200 |
| H | -0.87968900 | 0.57463800  | -3.13620500 |
| O | 1.27201300  | 2.86736400  | -1.93867000 |
| C | 1.31292400  | 4.31707600  | -0.08118700 |
| H | 0.70940400  | 4.89034400  | 0.63805400  |
| H | 2.02169200  | 4.98203100  | -0.59624200 |
| H | 1.45597300  | 1.46651100  | -3.38476600 |
| O | -2.21011100 | 0.96709200  | -0.67808800 |
| O | 2.02463600  | 3.32016200  | 0.63786200  |
| C | -0.66858000 | 2.76970600  | -0.42505900 |
| H | -0.19626900 | 2.12379500  | 0.31986100  |
| C | 3.30126700  | 3.04187600  | 0.21389500  |
| C | -1.99670000 | 3.35033500  | 1.47502100  |
| O | -1.58321800 | 2.41031600  | 2.10765200  |
| O | 3.91246700  | 3.76518000  | -0.52492000 |
| C | -3.04674900 | 4.32361300  | 1.94402800  |
| H | -2.73601000 | 5.36124500  | 1.73897600  |
| H | -3.98133000 | 4.14322100  | 1.38310200  |
| H | -3.23195800 | 4.17975200  | 3.01792700  |
| C | 3.78204000  | 1.73997800  | 0.78529900  |
| H | 4.85048200  | 1.61116400  | 0.56364200  |
| H | 3.61072600  | 1.70548600  | 1.87261700  |
| H | 3.21193500  | 0.90849200  | 0.33625100  |
| C | -3.13116800 | 0.29401800  | -1.39524000 |
| O | -3.29820600 | 0.50410100  | -2.57616300 |
| C | -3.95775300 | -0.68990000 | -0.62678200 |
| C | -5.07129700 | -1.16113300 | -1.34856900 |
| C | -3.72597700 | -1.16833400 | 0.68709800  |
| C | -5.97174500 | -2.06663300 | -0.79759700 |
| H | -5.20757200 | -0.78758700 | -2.36459300 |
| C | -4.65093500 | -2.08239300 | 1.22081000  |
| C | -5.76185400 | -2.52519200 | 0.50399800  |
| H | -6.83087600 | -2.41083800 | -1.38001200 |
| H | -4.49308100 | -2.45175200 | 2.23611200  |



|    |             |             |             |
|----|-------------|-------------|-------------|
| H  | -6.45808800 | -3.23274600 | 0.96381800  |
| C  | -2.58240300 | -0.77169200 | 1.57766300  |
| H  | -2.61128000 | 0.26049400  | 1.94347600  |
| C  | -1.95353500 | -1.79219600 | 2.47573000  |
| H  | -1.63525400 | -1.48409400 | 3.47226600  |
| H  | -2.27978700 | -2.82982500 | 2.38152300  |
| C  | -1.14160900 | -1.26567900 | 1.32343100  |
| C  | -0.05030800 | -0.27932800 | 1.62076300  |
| C  | -0.92687400 | -2.11370400 | 0.10480500  |
| O  | -0.57773500 | -1.67389700 | -0.98277700 |
| O  | -1.21950800 | -3.38248000 | 0.28616600  |
| O  | 0.59786700  | 0.32737700  | 0.78864500  |
| C  | -0.94566000 | -4.26977000 | -0.81503000 |
| H  | 0.13091000  | -4.22960100 | -1.04825800 |
| H  | -1.24150000 | -5.26740600 | -0.46354200 |
| H  | -1.53701700 | -3.97233300 | -1.69558400 |
| O  | 0.12281300  | -0.09386800 | 2.91738100  |
| C  | 1.14872400  | 0.82821400  | 3.30013400  |
| H  | 1.01187100  | 1.79083100  | 2.78598300  |
| H  | 1.05325900  | 0.94205200  | 4.38879100  |
| H  | 2.12898200  | 0.40019900  | 3.03717200  |
| Cu | 0.73068900  | -0.06620700 | -1.37032200 |
| O  | 2.46915600  | -1.01949600 | -1.06564900 |
| S  | 2.50322200  | -2.33810800 | -0.31484600 |
| O  | 2.39417700  | -3.51615200 | -1.18191400 |
| O  | 1.69569700  | -2.35136800 | 0.92349500  |
| C  | 4.26250300  | -2.33159600 | 0.30343300  |
| F  | 4.52352300  | -3.47883700 | 0.92636500  |
| F  | 4.44153000  | -1.32853700 | 1.17351800  |
| F  | 5.12098600  | -2.18025200 | -0.70064000 |

### TS1'

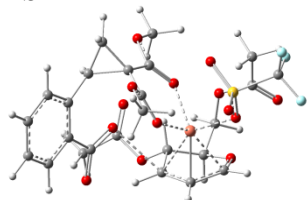

1 2

Electronic energy: -4357.754018

Thermal corrections: 0.430127

|   |             |            |             |
|---|-------------|------------|-------------|
| O | -1.27841200 | 3.85657700 | -0.76515500 |
| C | -0.69073900 | 1.86648900 | -1.86132800 |
| C | 1.07634300  | 3.51500200 | -1.11010100 |
| C | 0.28569300  | 1.22818000 | -2.61826800 |
| H | -1.77060400 | 1.78192000 | -2.07409300 |
| H | 0.93635800  | 4.30493500 | -1.86808900 |
| C | 1.64403400  | 1.51730200 | -2.33810000 |
| H | 0.03903200  | 0.51594000 | -3.41067500 |
| O | 2.03592800  | 2.57085000 | -1.67987800 |
| C | 1.75932600  | 4.07794000 | 0.13141100  |
| H | 1.04871300  | 4.72231400 | 0.67002400  |
| H | 2.65957000  | 4.64334500 | -0.15091000 |
| H | 2.47576400  | 0.95673100 | -2.77665000 |
| O | -2.23882100 | 0.93075700 | -0.01774400 |
| O | 2.10883800  | 3.00613300 | 0.99249400  |
| C | -0.27602900 | 2.85498000 | -0.80802200 |

|    |             |             |             |
|----|-------------|-------------|-------------|
| H  | -0.22209700 | 2.34887300  | 0.16746800  |
| C  | 3.40330700  | 2.55231900  | 0.93682100  |
| C  | -2.01814800 | 3.93889800  | 0.38933900  |
| O  | -1.55426500 | 3.67777700  | 1.46643600  |
| O  | 4.26425300  | 3.12205000  | 0.32230800  |
| C  | -3.41411800 | 4.38353100  | 0.07976500  |
| H  | -3.39964200 | 5.28337700  | -0.55828300 |
| H  | -3.88709000 | 3.57161600  | -0.50544400 |
| H  | -3.96975500 | 4.57389400  | 1.00875300  |
| C  | 3.56158800  | 1.28117100  | 1.72122500  |
| H  | 4.61983300  | 0.98808700  | 1.72733700  |
| H  | 3.19901100  | 1.41974000  | 2.75306300  |
| H  | 2.95960600  | 0.47960700  | 1.26332400  |
| C  | -3.24811900 | 0.66230200  | -0.73779300 |
| O  | -3.61446100 | 1.34075100  | -1.72185800 |
| C  | -4.03724400 | -0.60845800 | -0.42378800 |
| C  | -5.01172800 | -0.99593800 | -1.35491000 |
| C  | -3.81691900 | -1.42208900 | 0.71340200  |
| C  | -5.75217300 | -2.16671000 | -1.19040400 |
| H  | -5.16109700 | -0.34231700 | -2.21652900 |
| C  | -4.56919700 | -2.59547000 | 0.87016500  |
| C  | -5.52904300 | -2.97238300 | -0.07072300 |
| H  | -6.50368600 | -2.45037600 | -1.93362500 |
| H  | -4.40580100 | -3.21903300 | 1.75274500  |
| H  | -6.10413700 | -3.89177900 | 0.07549300  |
| C  | -2.81760900 | -1.04500700 | 1.75790100  |
| H  | -2.94976600 | -0.03730700 | 2.15690500  |
| C  | -2.09391300 | -2.00707600 | 2.62583800  |
| H  | -1.84794600 | -1.68993700 | 3.64103700  |
| H  | -2.25733000 | -3.07783300 | 2.48952600  |
| C  | -1.30113500 | -1.33685800 | 1.51426000  |
| C  | -0.43457300 | -0.16899100 | 1.82405600  |
| C  | -1.03080300 | -2.10385200 | 0.26547900  |
| O  | -0.62583000 | -1.61588700 | -0.78576000 |
| O  | -1.35404400 | -3.37472700 | 0.34675300  |
| O  | 0.37664200  | 0.36246200  | 1.07497100  |
| C  | -1.16559600 | -4.17401100 | -0.83634000 |
| H  | -0.10444000 | -4.14228700 | -1.12919100 |
| H  | -1.47531600 | -5.18824300 | -0.55069700 |
| H  | -1.80046900 | -3.78722700 | -1.64921800 |
| O  | -0.64873200 | 0.29419900  | 3.04322700  |
| C  | 0.00053700  | 1.51987200  | 3.41799400  |
| H  | -0.35536100 | 2.33865900  | 2.77631900  |
| H  | -0.28585900 | 1.68856100  | 4.46520700  |
| H  | 1.09010700  | 1.41165300  | 3.32376000  |
| Cu | 0.62045700  | -0.01282300 | -0.95993600 |
| O  | 2.39759200  | -0.92468100 | -1.02570600 |
| S  | 2.43481400  | -2.30822200 | -0.36743200 |
| O  | 2.09451700  | -3.39643400 | -1.28804600 |
| O  | 1.82460300  | -2.31603400 | 0.97124600  |
| C  | 4.27099100  | -2.47728600 | -0.07866200 |
| F  | 4.52452200  | -3.67101100 | 0.45003900  |
| F  | 4.70268900  | -1.53603900 | 0.76365500  |
| F  | 4.93404100  | -2.36106100 | -1.22614900 |

IM2'

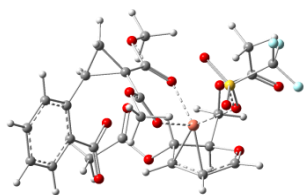

1 2

Electronic energy: -4357.75574852

Thermal corrections: 0.429905

|   |             |             |             |
|---|-------------|-------------|-------------|
| O | -1.11089600 | 3.76061000  | -0.88280700 |
| C | -0.39427700 | 1.71981600  | -1.77615300 |
| C | 1.27076400  | 3.51213300  | -1.03195400 |
| C | 0.59290900  | 1.23282700  | -2.63435300 |
| H | -1.47844600 | 1.51089900  | -1.91466600 |
| H | 1.10645400  | 4.36220300  | -1.71398100 |
| C | 1.92797100  | 1.64101400  | -2.41441500 |
| H | 0.38294200  | 0.50730100  | -3.42533700 |
| O | 2.26793200  | 2.66391700  | -1.70805900 |
| C | 1.94880700  | 3.97079500  | 0.25075600  |
| H | 1.24434500  | 4.60433800  | 0.81017700  |
| H | 2.87635200  | 4.51701000  | 0.02397900  |
| H | 2.78355000  | 1.13458200  | -2.87680400 |
| O | -2.44433700 | 1.19340900  | 0.30190600  |
| O | 2.23156600  | 2.83724400  | 1.05746500  |
| C | -0.07145700 | 2.80220600  | -0.78123400 |
| H | -0.08033100 | 2.37463700  | 0.23174100  |
| C | 3.50331200  | 2.32467400  | 1.02196300  |
| C | -1.85402500 | 3.97694900  | 0.25534300  |
| O | -1.36775200 | 3.89341400  | 1.35201800  |
| O | 4.40089900  | 2.85753700  | 0.42672100  |
| C | -3.25386000 | 4.36115100  | -0.10772100 |
| H | -3.24523200 | 5.28182400  | -0.71798300 |
| H | -3.66697000 | 3.54785200  | -0.73138900 |
| H | -3.85092500 | 4.51381600  | 0.80206000  |
| C | 3.58136400  | 1.04124600  | 1.79895600  |
| H | 4.62431300  | 0.69895600  | 1.83198400  |
| H | 3.19415100  | 1.18673500  | 2.82099400  |
| H | 2.95801100  | 0.27192500  | 1.31537000  |
| C | -3.20560100 | 0.78104400  | -0.61422700 |
| O | -3.29965300 | 1.29808800  | -1.75602100 |
| C | -4.06518800 | -0.46233400 | -0.36208400 |
| C | -5.03282400 | -0.78472300 | -1.32478600 |
| C | -3.90564100 | -1.32080200 | 0.75072600  |
| C | -5.84047400 | -1.91539300 | -1.19662200 |
| H | -5.11928800 | -0.11600000 | -2.18342800 |
| C | -4.71069200 | -2.46282400 | 0.86523400  |
| C | -5.67874700 | -2.76099100 | -0.09520800 |
| H | -6.59298500 | -2.14146200 | -1.95856500 |
| H | -4.57748200 | -3.12413500 | 1.72585900  |
| H | -6.30250800 | -3.65320300 | 0.01632400  |
| C | -2.88138100 | -1.02777800 | 1.79449900  |
| H | -2.99009900 | -0.04542400 | 2.25504400  |
| C | -2.12222100 | -2.03886100 | 2.56308700  |
| H | -1.82852800 | -1.78407800 | 3.58370900  |
| H | -2.28342900 | -3.10060700 | 2.36499400  |
| C | -1.37390800 | -1.29534100 | 1.46061900  |
| C | -0.50295700 | -0.14329100 | 1.79501500  |

|    |             |             |             |
|----|-------------|-------------|-------------|
| C  | -1.15215100 | -1.98577700 | 0.16058800  |
| O  | -0.72430100 | -1.44764500 | -0.85902600 |
| O  | -1.54490200 | -3.23837300 | 0.15407300  |
| O  | 0.33614100  | 0.37798000  | 1.06406700  |
| C  | -1.42102600 | -3.95913700 | -1.08601100 |
| H  | -0.36030100 | -3.98926000 | -1.38014100 |
| H  | -1.80875100 | -4.96451800 | -0.87403500 |
| H  | -2.02449700 | -3.46453400 | -1.86337000 |
| O  | -0.72335300 | 0.31689300  | 3.01101400  |
| C  | -0.11381200 | 1.56581100  | 3.37816300  |
| H  | -0.55016900 | 2.37662400  | 2.77513200  |
| H  | -0.34715400 | 1.69870000  | 4.44348800  |
| H  | 0.97203400  | 1.52260100  | 3.21465300  |
| Cu | 0.68036600  | 0.05068000  | -0.92939900 |
| O  | 2.38443000  | -0.97193900 | -0.94836100 |
| S  | 2.29756200  | -2.38510300 | -0.35935700 |
| O  | 1.90676500  | -3.39681400 | -1.34411300 |
| O  | 1.64113500  | -2.40459600 | 0.95675400  |
| C  | 4.10472900  | -2.70754600 | -0.02420000 |
| F  | 4.25006900  | -3.94266600 | 0.44572200  |
| F  | 4.57549200  | -1.84665200 | 0.88056800  |
| F  | 4.81291600  | -2.58200000 | -1.14345300 |

### IM2'\_relaxed

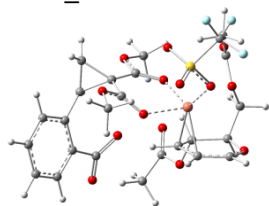

1 2

Electronic energy: -4357.7588431

Thermal corrections: 0.4301042

|   |             |            |             |
|---|-------------|------------|-------------|
| O | -1.11089600 | 3.76061000 | -0.88280700 |
| C | -0.39427700 | 1.71981600 | -1.77615300 |
| C | 1.27076400  | 3.51213300 | -1.03195400 |
| C | 0.59290900  | 1.23282700 | -2.63435300 |
| H | -1.47844600 | 1.51089900 | -1.91466600 |
| H | 1.10645400  | 4.36220300 | -1.71398100 |
| C | 1.92797100  | 1.64101400 | -2.41441500 |
| H | 0.38294200  | 0.50730100 | -3.42533700 |
| O | 2.26793200  | 2.66391700 | -1.70805900 |
| C | 1.94880700  | 3.97079500 | 0.25075600  |
| H | 1.24434500  | 4.60433800 | 0.81017700  |
| H | 2.87635200  | 4.51701000 | 0.02397900  |
| H | 2.78355000  | 1.13458200 | -2.87680400 |
| O | -2.44433700 | 1.19340900 | 0.30190600  |
| O | 2.23156600  | 2.83724400 | 1.05746500  |
| C | -0.07145700 | 2.80220600 | -0.78123400 |
| H | -0.08033100 | 2.37463700 | 0.23174100  |
| C | 3.50331200  | 2.32467400 | 1.02196300  |
| C | -1.85402500 | 3.97694900 | 0.25534300  |
| O | -1.36775200 | 3.89341400 | 1.35201800  |
| O | 4.40089900  | 2.85753700 | 0.42672100  |
| C | -3.25386000 | 4.36115100 | -0.10772100 |
| H | -3.24523200 | 5.28182400 | -0.71798300 |
| H | -3.66697000 | 3.54785200 | -0.73138900 |

|    |             |             |             |
|----|-------------|-------------|-------------|
| H  | -3.85092500 | 4.51381600  | 0.80206000  |
| C  | 3.58136400  | 1.04124600  | 1.79895600  |
| H  | 4.62431300  | 0.69895600  | 1.83198400  |
| H  | 3.19415100  | 1.18673500  | 2.82099400  |
| H  | 2.95801100  | 0.27192500  | 1.31537000  |
| C  | -3.20560100 | 0.78104400  | -0.61422700 |
| O  | -3.29965300 | 1.29808800  | -1.75602100 |
| C  | -4.06518800 | -0.46233400 | -0.36208400 |
| C  | -5.03282400 | -0.78472300 | -1.32478600 |
| C  | -3.90564100 | -1.32080200 | 0.75072600  |
| C  | -5.84047400 | -1.91539300 | -1.19662200 |
| H  | -5.11928800 | -0.11600000 | -2.18342800 |
| C  | -4.71069200 | -2.46282400 | 0.86523400  |
| C  | -5.67874700 | -2.76099100 | -0.09520800 |
| H  | -6.59298500 | -2.14146200 | -1.95856500 |
| H  | -4.57748200 | -3.12413500 | 1.72585900  |
| H  | -6.30250800 | -3.65320300 | 0.01632400  |
| C  | -2.88138100 | -1.02777800 | 1.79449900  |
| H  | -2.99009900 | -0.04542400 | 2.25504400  |
| C  | -2.12222100 | -2.03886100 | 2.56308700  |
| H  | -1.82852800 | -1.78407800 | 3.58370900  |
| H  | -2.28342900 | -3.10060700 | 2.36499400  |
| C  | -1.37390800 | -1.29534100 | 1.46061900  |
| C  | -0.50295700 | -0.14329100 | 1.79501500  |
| C  | -1.15215100 | -1.98577700 | 0.16058800  |
| O  | -0.72430100 | -1.44764500 | -0.85902600 |
| O  | -1.54490200 | -3.23837300 | 0.15407300  |
| O  | 0.33614100  | 0.37798000  | 1.06406700  |
| C  | -1.42102600 | -3.95913700 | -1.08601100 |
| H  | -0.36030100 | -3.98926000 | -1.38014100 |
| H  | -1.80875100 | -4.96451800 | -0.87403500 |
| H  | -2.02449700 | -3.46453400 | -1.86337000 |
| O  | -0.72335300 | 0.31689300  | 3.01101400  |
| C  | -0.11381200 | 1.56581100  | 3.37816300  |
| H  | -0.55016900 | 2.37662400  | 2.77513200  |
| H  | -0.34715400 | 1.69870000  | 4.44348800  |
| H  | 0.97203400  | 1.52260100  | 3.21465300  |
| Cu | 0.68036600  | 0.05068000  | -0.92939900 |
| O  | 2.38443000  | -0.97193900 | -0.94836100 |
| S  | 2.29756200  | -2.38510300 | -0.35935700 |
| O  | 1.90676500  | -3.39681400 | -1.34411300 |
| O  | 1.64113500  | -2.40459600 | 0.95675400  |
| C  | 4.10472900  | -2.70754600 | -0.02420000 |
| F  | 4.25006900  | -3.94266600 | 0.44572200  |
| F  | 4.57549200  | -1.84665200 | 0.88056800  |
| F  | 4.81291600  | -2.58200000 | -1.14345300 |

TS2'

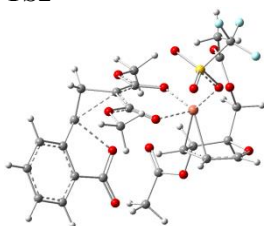

1 2

Electronic energy: -4357.699113

Thermal corrections: 0.424299

|   |             |             |             |
|---|-------------|-------------|-------------|
| O | -1.33563000 | 3.54932800  | -1.11322800 |
| C | -0.37677500 | 1.46851000  | -1.61750600 |
| C | 1.08540700  | 3.53009300  | -1.12010600 |
| C | 0.56477000  | 1.09003200  | -2.58476400 |
| H | -1.37991600 | 1.03135200  | -1.53639000 |
| H | 0.81307300  | 4.41912100  | -1.71015000 |
| C | 1.81132400  | 1.74123700  | -2.58604200 |
| H | 0.40931400  | 0.24590700  | -3.26034800 |
| O | 2.07209000  | 2.83817900  | -1.96084800 |
| C | 1.81931000  | 3.97266800  | 0.13872200  |
| H | 1.16618000  | 4.68354400  | 0.66758800  |
| H | 2.77445700  | 4.44714500  | -0.13481300 |
| H | 2.66568100  | 1.36669500  | -3.16159200 |
| O | -3.64892500 | 0.60357500  | 1.81053300  |
| O | 2.03662900  | 2.89669700  | 1.03460600  |
| C | -0.20260100 | 2.73155100  | -0.82051700 |
| H | -0.22895300 | 2.47065800  | 0.24690800  |
| C | 3.23405600  | 2.22915800  | 0.97361800  |
| C | -2.02577500 | 4.02143700  | -0.02898400 |
| O | -1.53618100 | 4.08347400  | 1.06773900  |
| O | 4.07726400  | 2.50336800  | 0.16109700  |
| C | -3.41729600 | 4.42018400  | -0.41719500 |
| H | -3.86566500 | 5.04262200  | 0.37006100  |
| H | -3.42523600 | 4.94018300  | -1.38883100 |
| H | -3.98550500 | 3.47877300  | -0.52267500 |
| C | 3.30724400  | 1.15849600  | 2.02247300  |
| H | 4.35896200  | 0.88624300  | 2.18472100  |
| H | 2.83251700  | 1.49420800  | 2.95732000  |
| H | 2.76622300  | 0.26379400  | 1.67271200  |
| C | -3.53268200 | 0.44294900  | 0.58809500  |
| O | -2.93250800 | 1.15588400  | -0.25244400 |
| C | -4.32494100 | -0.71900000 | -0.01041600 |
| C | -5.27403300 | -0.36094000 | -0.97933400 |
| C | -4.24698000 | -2.10597800 | 0.37288600  |
| C | -6.12863100 | -1.29572800 | -1.55668500 |
| H | -5.31628900 | 0.68543700  | -1.28922500 |
| C | -5.14039100 | -3.04421400 | -0.24668800 |
| C | -6.06531900 | -2.65536000 | -1.19073100 |
| H | -6.85169700 | -0.97193300 | -2.31214100 |
| H | -5.06288100 | -4.09687400 | 0.04010800  |
| H | -6.73397500 | -3.38645900 | -1.65201000 |
| C | -3.36575500 | -2.66257600 | 1.31883200  |
| H | -3.54033900 | -3.72693800 | 1.51575900  |
| C | -2.29525100 | -2.03078700 | 2.09688000  |
| H | -2.77640600 | -1.18936300 | 2.64690500  |
| H | -1.87677900 | -2.74974400 | 2.82253700  |
| C | -1.25389100 | -1.39071100 | 1.20505100  |
| C | -0.61597100 | -0.20978100 | 1.65024900  |
| C | -0.89948700 | -2.02771700 | -0.01217300 |
| O | -0.21358800 | -1.58184600 | -0.95118400 |
| O | -1.41514300 | -3.27718200 | -0.14335800 |
| O | 0.24453900  | 0.47985700  | 1.03784600  |
| C | -0.99311000 | -4.02391600 | -1.28642000 |
| H | 0.10768000  | -4.04532100 | -1.33742700 |
| H | -1.40230100 | -5.03582000 | -1.14703400 |
| H | -1.39141900 | -3.57621400 | -2.21292200 |

|    |             |             |             |
|----|-------------|-------------|-------------|
| O  | -0.96915800 | 0.17812600  | 2.87737700  |
| C  | -0.71696400 | 1.53121600  | 3.25576000  |
| H  | -1.37824100 | 2.20175800  | 2.68400300  |
| H  | -0.95900600 | 1.58751800  | 4.32701300  |
| H  | 0.33460300  | 1.80358400  | 3.07874400  |
| Cu | 0.93780400  | 0.12617100  | -0.76829300 |
| O  | 2.73157900  | -0.69885300 | -0.78626800 |
| S  | 2.78220900  | -2.12369900 | -0.21766800 |
| O  | 2.50908600  | -3.16304200 | -1.21325700 |
| O  | 2.13712800  | -2.22027900 | 1.09839600  |
| C  | 4.61483100  | -2.25775900 | 0.10990800  |
| F  | 4.88770100  | -3.46917300 | 0.59211500  |
| F  | 5.00785400  | -1.34722600 | 1.00325800  |
| F  | 5.30558500  | -2.07763700 | -1.01439000 |

### IM3'

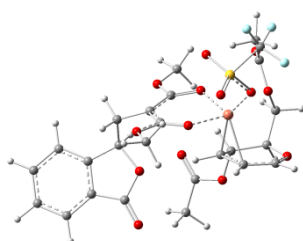

1 2

Electronic energy: -4357.795185

Thermal corrections: 0.430812

|   |             |             |             |
|---|-------------|-------------|-------------|
| O | -1.22349700 | 2.49387400  | -1.82283300 |
| C | -0.30356000 | 0.44235600  | -1.20874500 |
| C | 1.12771800  | 2.56709600  | -1.13950500 |
| C | 0.68662600  | -0.15612400 | -1.99511400 |
| H | -1.28279700 | -0.02742100 | -1.09810200 |
| H | 0.99576800  | 3.51600000  | -1.67254900 |
| C | 1.83584000  | 0.58381700  | -2.33448500 |
| H | 0.61102400  | -1.17738700 | -2.36957900 |
| O | 2.03022600  | 1.81730900  | -2.02639000 |
| C | 1.88577100  | 2.88051900  | 0.13131200  |
| H | 1.27528500  | 3.57228400  | 0.73134700  |
| H | 2.83991000  | 3.37301200  | -0.12339300 |
| H | 2.64417500  | 0.14145900  | -2.92134100 |
| O | -4.20495300 | 0.45238600  | 1.50456600  |
| O | 2.16275000  | 1.69401800  | 0.86199000  |
| C | -0.25545100 | 1.91957000  | -0.93496900 |
| H | -0.57836200 | 2.11314700  | 0.09780500  |
| C | 2.21488200  | 1.83022500  | 2.23171500  |
| C | -1.69066400 | 3.72102300  | -1.44322800 |
| O | -1.16495300 | 4.35658400  | -0.56715000 |
| O | 1.91309800  | 2.86252100  | 2.77037300  |
| C | -2.89241200 | 4.12287400  | -2.24690100 |
| H | -2.81069900 | 3.77586000  | -3.28923500 |
| H | -3.76803000 | 3.63720900  | -1.78212400 |
| H | -3.02033500 | 5.21430900  | -2.20529300 |
| C | 2.68349600  | 0.58040900  | 2.91310500  |
| H | 2.94732600  | 0.82550600  | 3.95207600  |
| H | 1.86612600  | -0.15804900 | 2.90140700  |
| H | 3.53040000  | 0.12924600  | 2.37863500  |
| C | -3.77886500 | 0.96569300  | 0.33095200  |
| O | -3.33793100 | 2.08716400  | 0.22805000  |

|    |             |             |             |
|----|-------------|-------------|-------------|
| C  | -3.96071500 | -0.07693700 | -0.70642600 |
| C  | -3.73139300 | -0.02049100 | -2.08322000 |
| C  | -4.42946300 | -1.22929200 | -0.07728800 |
| C  | -3.99683200 | -1.17076800 | -2.82934600 |
| H  | -3.34687000 | 0.89164800  | -2.54569200 |
| C  | -4.69605400 | -2.37768700 | -0.81958800 |
| C  | -4.47916400 | -2.33330900 | -2.20143800 |
| H  | -3.83391300 | -1.17108600 | -3.91089200 |
| H  | -5.04708300 | -3.29462500 | -0.34024500 |
| H  | -4.68378300 | -3.22175000 | -2.80623200 |
| C  | -4.46399500 | -0.96591200 | 1.40688600  |
| H  | -5.45736100 | -1.14370300 | 1.85139200  |
| C  | -3.37674100 | -1.72590700 | 2.20460200  |
| H  | -3.45138800 | -1.39459400 | 3.25042800  |
| H  | -3.62518900 | -2.79716600 | 2.17084900  |
| C  | -1.98650500 | -1.48466800 | 1.66173500  |
| C  | -1.26620000 | -0.34516000 | 2.09175800  |
| C  | -1.44627900 | -2.37294600 | 0.68372000  |
| O  | -0.39724200 | -2.25333300 | 0.02006200  |
| O  | -2.20989200 | -3.47279000 | 0.46746800  |
| O  | -0.16525800 | 0.10654900  | 1.65296600  |
| C  | -1.77573200 | -4.36493000 | -0.54841200 |
| H  | -0.76154600 | -4.74269600 | -0.33983600 |
| H  | -2.49972600 | -5.19368500 | -0.54852800 |
| H  | -1.77300100 | -3.86672000 | -1.53357100 |
| O  | -1.84237200 | 0.33214700  | 3.09646400  |
| C  | -1.39654600 | 1.65784900  | 3.36891300  |
| H  | -1.57468400 | 2.30733400  | 2.49451800  |
| H  | -2.01184300 | 2.00496700  | 4.21150100  |
| H  | -0.33022100 | 1.68707300  | 3.63995800  |
| Cu | 0.87115400  | -0.56101300 | 0.10026300  |
| O  | 2.64119900  | -1.35035900 | 0.51030600  |
| S  | 3.65971700  | -1.87586500 | -0.48273800 |
| O  | 3.19314300  | -1.78053000 | -1.88386700 |
| O  | 4.32320900  | -3.09845000 | -0.05407200 |
| C  | 4.96575300  | -0.54128500 | -0.38430100 |
| F  | 6.00978000  | -0.85481700 | -1.14488100 |
| F  | 5.38622300  | -0.36671100 | 0.86981500  |
| F  | 4.46473000  | 0.62933700  | -0.82170600 |

### I.III Sc-Catalyzed ring opening without coordination IM1

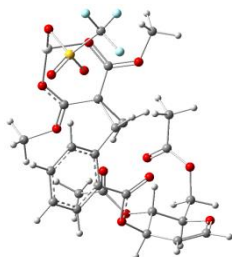

2 1

Electronic energy: -3477.56361755

Thermal corrections: 0.4009827

|   |            |             |             |
|---|------------|-------------|-------------|
| O | 5.09132200 | 0.48771300  | 0.87759200  |
| C | 4.51343800 | 1.81604500  | -1.04619700 |
| C | 5.97700100 | -0.21437800 | -1.23714400 |
| C | 4.63408400 | 1.84858700  | -2.53753100 |



|   |             |             |             |
|---|-------------|-------------|-------------|
| H | 5.22180800  | 2.51853400  | -0.57665100 |
| H | 6.86938200  | 0.41801600  | -1.07116600 |
| C | 5.19647300  | 0.82401400  | -3.21803200 |
| H | 4.24463100  | 2.71108400  | -3.08259800 |
| O | 5.72784800  | -0.25849100 | -2.64749600 |
| C | 6.31785100  | -1.62304800 | -0.77975000 |
| H | 6.76675100  | -1.59718200 | 0.22257100  |
| H | 7.02818700  | -2.05815900 | -1.49898300 |
| H | 5.26516700  | 0.79216600  | -4.30922000 |
| O | 3.24575600  | 2.31244600  | -0.55096100 |
| O | 5.16307800  | -2.46472600 | -0.77559500 |
| C | 4.78167100  | 0.41402200  | -0.50679400 |
| H | 3.89279900  | -0.21265300 | -0.64998200 |
| C | 4.71069300  | -2.92871800 | 0.41373000  |
| C | 4.08937100  | 0.22746000  | 1.74335000  |
| O | 2.94594800  | 0.05484300  | 1.37390700  |
| O | 5.23616600  | -2.68256700 | 1.46927500  |
| C | 4.58311500  | 0.16620900  | 3.15740200  |
| H | 4.97907900  | -0.85298600 | 3.31571800  |
| H | 5.39992600  | 0.88397400  | 3.32971300  |
| H | 3.75513600  | 0.33772000  | 3.86054300  |
| C | 3.45401600  | -3.74016100 | 0.23595800  |
| H | 3.34204800  | -4.43349000 | 1.08233000  |
| H | 2.59797700  | -3.04099900 | 0.23680500  |
| H | 3.46061300  | -4.28468500 | -0.72076100 |
| C | 2.11026300  | 1.70837200  | -0.90862700 |
| O | 2.04115600  | 0.70317300  | -1.57773400 |
| C | 0.89977700  | 2.38039300  | -0.33015100 |
| C | 0.93731300  | 3.72978400  | 0.05573400  |
| C | -0.32273400 | 1.68517200  | -0.29542100 |
| C | -0.22726300 | 4.40286600  | 0.43085300  |
| H | 1.89274200  | 4.25451400  | 0.03006000  |
| C | -1.49300200 | 2.38168700  | 0.04785500  |
| C | -1.45466400 | 3.73118200  | 0.40792100  |
| H | -0.17998500 | 5.45814100  | 0.71181500  |
| H | -2.45534200 | 1.86701800  | -0.01093300 |
| H | -2.38083800 | 4.25955700  | 0.65022100  |
| C | -0.40325200 | 0.22708300  | -0.61858800 |
| H | -0.95640300 | -0.02332600 | -1.53152100 |
| C | 0.52662700  | -0.77821500 | -0.12140800 |
| H | 0.71971600  | -1.64664200 | -0.75599700 |
| H | 1.35179800  | -0.45719600 | 0.52361300  |
| C | -0.85299700 | -0.79682700 | 0.57014800  |
| C | -0.98392200 | -0.15650200 | 1.88583900  |
| C | -1.83417500 | -1.85171300 | 0.22482500  |
| O | -2.81797300 | -2.18338200 | 0.96605200  |
| O | -1.61119300 | -2.44704200 | -0.88647600 |
| O | -2.11484500 | -0.12505400 | 2.50305300  |
| C | -2.53647200 | -3.44721600 | -1.41234600 |
| H | -3.52681500 | -2.98564700 | -1.52191300 |
| H | -2.11746700 | -3.73219300 | -2.38480900 |
| H | -2.56972300 | -4.30663800 | -0.72712500 |
| O | 0.04775300  | 0.37822400  | 2.37996700  |
| C | 0.02665100  | 1.21111300  | 3.57730900  |
| H | -0.29639400 | 0.60173600  | 4.43382700  |
| H | 1.06312200  | 1.54781800  | 3.69280100  |
| H | -0.65572200 | 2.05596900  | 3.40045200  |

|    |             |             |             |
|----|-------------|-------------|-------------|
| O  | -5.69897300 | -0.42163700 | 0.94547600  |
| S  | -5.21885200 | 0.38948900  | -0.31892500 |
| O  | -3.75458400 | 0.00851300  | -0.26762700 |
| O  | -5.52389000 | 1.79537300  | -0.23414500 |
| C  | -6.09898100 | -0.40281000 | -1.79317600 |
| F  | -5.76871500 | -1.68519100 | -1.80906300 |
| F  | -7.37979000 | -0.24717700 | -1.61489200 |
| F  | -5.66809900 | 0.20732900  | -2.86611400 |
| Sc | -3.95176000 | -0.71078100 | 1.84703500  |

## II. Nucleophilic attack by the acceptor

### II.I Cu-OTf directed attack by MeOH

#### IM4 $\alpha$

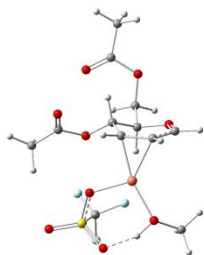

1 2

Electronic energy: -3481.153151

Thermal corrections: 0.245176

|    |             |             |             |
|----|-------------|-------------|-------------|
| O  | 1.08011900  | -1.13734200 | -0.24607100 |
| C  | 0.77845200  | 0.90942700  | -1.55357600 |
| C  | 1.64583800  | 0.82332600  | 0.83065700  |
| C  | 0.66947200  | 2.30740300  | -1.42738800 |
| H  | 0.62387500  | 0.41375600  | -2.51788300 |
| H  | 0.69412800  | 0.63879400  | 1.35623600  |
| C  | 1.20562100  | 2.92678500  | -0.26746100 |
| H  | 0.36600200  | 2.95459700  | -2.25642400 |
| O  | 1.70916400  | 2.30124300  | 0.72201200  |
| C  | 2.78830300  | 0.39214500  | 1.72966000  |
| H  | 2.65626600  | -0.68137100 | 1.93623200  |
| H  | 2.74355000  | 0.96492800  | 2.66884300  |
| H  | 1.24565600  | 4.01956100  | -0.15921300 |
| O  | 4.05603800  | 0.64637800  | 1.15073800  |
| C  | 1.59174500  | 0.13888100  | -0.53872500 |
| H  | 2.59644300  | 0.03902200  | -0.98881900 |
| C  | 4.68258500  | -0.40845300 | 0.53093600  |
| C  | 1.16612100  | -2.07191000 | -1.26350800 |
| O  | 1.62972700  | -1.76739700 | -2.32747900 |
| O  | 4.11440700  | -1.44682900 | 0.31921100  |
| C  | 0.57921000  | -3.38105800 | -0.84475100 |
| H  | 0.93825900  | -3.66632100 | 0.15691400  |
| H  | -0.51967000 | -3.27783700 | -0.79701100 |
| H  | 0.84054400  | -4.14997800 | -1.58506300 |
| C  | 6.10419900  | -0.06969100 | 0.19225700  |
| H  | 6.50473600  | -0.81443400 | -0.50979100 |
| H  | 6.17573900  | 0.94607800  | -0.22942800 |
| H  | 6.70673800  | -0.08304700 | 1.11855900  |
| Cu | -1.08707300 | 1.27289300  | -0.87512700 |
| O  | -3.08002700 | -2.51273400 | -0.57662800 |
| S  | -2.79158900 | -1.13189000 | -0.25211100 |
| O  | -1.61951200 | -0.57024100 | -1.07819500 |
| O  | -3.89115600 | -0.14592100 | -0.15495400 |
| C  | -2.05462200 | -1.11899900 | 1.47276200  |

|   |             |             |             |
|---|-------------|-------------|-------------|
| F | -1.08103900 | -2.00384500 | 1.59483000  |
| F | -1.52217800 | 0.12175600  | 1.69562700  |
| F | -2.98345700 | -1.33454600 | 2.37682600  |
| O | -2.74822700 | 2.17866500  | -0.34533100 |
| H | -3.41192000 | 1.42252600  | -0.30649000 |
| C | -2.94329800 | 3.07201100  | 0.75883200  |
| H | -2.76974900 | 2.55621800  | 1.71948600  |
| H | -2.23549100 | 3.90767200  | 0.64546300  |
| H | -3.97052100 | 3.47010500  | 0.73070900  |

### TS4 $\alpha$

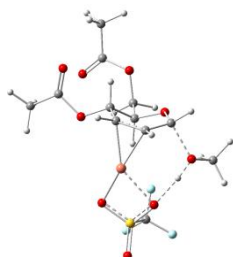

1 2

Electronic energy: -3481.14259729

Thermal corrections: 0.246309

|    |             |             |             |
|----|-------------|-------------|-------------|
| O  | 1.88277700  | -1.25533700 | -0.54302200 |
| C  | 0.85507800  | 0.27008900  | -2.09439200 |
| C  | 1.13843800  | 0.82449700  | 0.32339700  |
| C  | -0.00711200 | 1.35767300  | -2.18202000 |
| H  | 1.09366400  | -0.33211900 | -2.97946300 |
| H  | 0.18708800  | 0.34663800  | 0.61420400  |
| C  | 0.09003000  | 2.40475600  | -1.13204700 |
| H  | -0.47650700 | 1.65519900  | -3.12613000 |
| O  | 0.81906600  | 2.20134400  | -0.07704800 |
| C  | 2.03835300  | 0.88063300  | 1.54097100  |
| H  | 2.04153900  | -0.10927400 | 2.02193200  |
| H  | 1.64326600  | 1.63053700  | 2.24573000  |
| H  | 0.10119000  | 3.44901200  | -1.46047400 |
| O  | 3.35898700  | 1.24903400  | 1.18564500  |
| C  | 1.73816100  | 0.10661800  | -0.88552800 |
| H  | 2.73110300  | 0.52889800  | -1.12649400 |
| C  | 4.34685500  | 0.31558700  | 1.39987000  |
| C  | 3.13160200  | -1.82068900 | -0.76921500 |
| O  | 3.99862600  | -1.20430500 | -1.32340600 |
| O  | 4.10982100  | -0.77139400 | 1.85707100  |
| C  | 3.20658400  | -3.20085800 | -0.20175000 |
| H  | 3.50378700  | -3.09600600 | 0.85810300  |
| H  | 2.23247400  | -3.71127400 | -0.24542000 |
| H  | 3.98209600  | -3.77524500 | -0.72899000 |
| C  | 5.68080300  | 0.81647100  | 0.93673000  |
| H  | 6.47647700  | 0.34140100  | 1.52971900  |
| H  | 5.80622500  | 0.50418600  | -0.11668100 |
| H  | 5.74635100  | 1.91318500  | 0.99341500  |
| Cu | -1.06729300 | -0.25891800 | -1.53885800 |
| O  | -1.90472900 | -1.79405700 | -0.50149800 |
| S  | -3.14721100 | -1.01903300 | -0.11249100 |
| O  | -2.94479300 | 0.35050700  | -0.78809100 |
| O  | -4.44019300 | -1.63656500 | -0.25660000 |
| C  | -2.90044000 | -0.61336100 | 1.69861200  |
| F  | -1.72525800 | 0.03933000  | 1.83000800  |



|   |             |             |             |
|---|-------------|-------------|-------------|
| F | -3.45922300 | -0.89780800 | 2.55361600  |
| C | -1.72381100 | 3.17280000  | -0.34997300 |
| H | -2.69884800 | 3.03308600  | 0.13716900  |
| H | -0.97097200 | 3.48544700  | 0.38888100  |
| H | -1.80914000 | 3.92616900  | -1.15191100 |
| O | -1.35464900 | 1.89782500  | -0.91171900 |
| H | -2.52610600 | 0.98019700  | -1.03667600 |

**IM4 $\beta$**

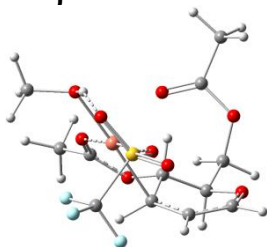

1 2

Electronic energy: -3481.158986

Thermal corrections: 0.2504325

|    |             |             |             |
|----|-------------|-------------|-------------|
| O  | -2.31271100 | -0.54718500 | -1.65248400 |
| C  | -0.40383800 | 0.90271500  | -1.20147000 |
| C  | -2.78559500 | 1.67254800  | -0.94300200 |
| C  | -0.01960200 | 2.19735500  | -0.84412700 |
| H  | 0.12231100  | 0.37958600  | -2.00951200 |
| H  | -2.87890300 | 1.98374600  | -1.99981600 |
| C  | -0.95415000 | 3.04871100  | -0.27039600 |
| H  | 1.00457300  | 2.54576400  | -0.97471900 |
| O  | -2.24043300 | 2.80956500  | -0.22419500 |
| C  | -4.17671100 | 1.39448500  | -0.39069400 |
| H  | -4.62157000 | 0.56499000  | -0.96179100 |
| H  | -4.78764200 | 2.30153500  | -0.51129000 |
| H  | -0.69394400 | 4.02960400  | 0.14270600  |
| O  | -4.17678700 | 1.10784000  | 1.00219000  |
| C  | -1.81475800 | 0.50121200  | -0.83352800 |
| H  | -1.83747100 | 0.16416800  | 0.21626400  |
| C  | -4.11188700 | -0.18864100 | 1.40512600  |
| C  | -1.81038300 | -1.75881300 | -1.42845300 |
| O  | -0.79323200 | -1.92143400 | -0.75563800 |
| O  | -3.86045800 | -1.09084000 | 0.64052800  |
| C  | -2.59916400 | -2.86662200 | -2.02870100 |
| H  | -3.43054900 | -3.07657300 | -1.32865800 |
| H  | -3.03696700 | -2.55896100 | -2.99119300 |
| H  | -1.97924600 | -3.76740200 | -2.13860200 |
| C  | -4.38558600 | -0.31767600 | 2.87451900  |
| H  | -4.11833300 | -1.32726700 | 3.21663200  |
| H  | -3.83152800 | 0.44856300  | 3.44122400  |
| H  | -5.46119800 | -0.14248200 | 3.05745100  |
| Cu | 0.50468900  | -0.68616600 | 0.09906900  |
| O  | 3.41960800  | -0.61698100 | 1.70261300  |
| S  | 3.05119900  | 0.65358300  | 1.05141300  |
| O  | 1.51947400  | 0.76116900  | 0.84878600  |
| O  | 3.61450000  | 1.90617600  | 1.50745400  |
| C  | 3.57769100  | 0.42500700  | -0.73236700 |
| F  | 2.93006200  | -0.65440200 | -1.23593500 |
| F  | 3.21363800  | 1.48345700  | -1.45916000 |
| F  | 4.87201000  | 0.23465400  | -0.83351400 |
| O  | 1.34586000  | -2.17072000 | 1.21283200  |
| H  | 2.14548100  | -1.75360600 | 1.63337100  |

|   |            |             |             |
|---|------------|-------------|-------------|
| C | 1.70501600 | -3.43379900 | 0.64507600  |
| H | 2.00008900 | -4.13319000 | 1.44559300  |
| H | 0.81823500 | -3.82901000 | 0.12888900  |
| H | 2.53733600 | -3.32094200 | -0.07327100 |

### TS4 $\beta$

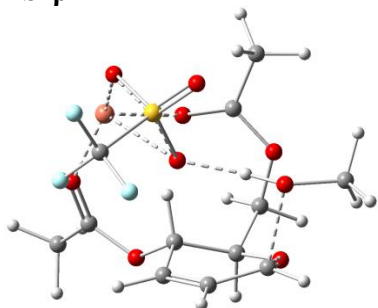

1 2

Electronic energy: -3481.141687

Thermal corrections: 0.2496671

|    |             |             |             |
|----|-------------|-------------|-------------|
| O  | -2.38226700 | -1.34839200 | -1.39291000 |
| C  | -0.63503700 | 0.13156600  | -2.29195600 |
| C  | -2.59345600 | 0.94643600  | -0.96627500 |
| C  | -0.26878300 | 1.41052700  | -2.51895200 |
| H  | -0.16586000 | -0.70151300 | -2.82451000 |
| H  | -3.38375300 | 0.82200100  | -1.72732800 |
| C  | -0.88618500 | 2.48359500  | -1.75825300 |
| H  | 0.51142600  | 1.67734900  | -3.23499900 |
| O  | -2.03981400 | 2.26529000  | -1.18590400 |
| C  | -3.24993600 | 0.97487600  | 0.40630700  |
| H  | -3.66242100 | -0.01969700 | 0.63281900  |
| H  | -4.05915100 | 1.71858100  | 0.41366500  |
| H  | -0.69476100 | 3.51174900  | -2.05704700 |
| O  | -2.33143000 | 1.39946100  | 1.41800300  |
| C  | -1.58385600 | -0.18236500 | -1.17788000 |
| H  | -0.97090400 | -0.35192600 | -0.29239200 |
| C  | -1.61804200 | 0.48982000  | 2.10458300  |
| C  | -2.02948700 | -2.52035800 | -0.82536700 |
| O  | -0.98650300 | -2.71168200 | -0.21878100 |
| O  | -1.65146800 | -0.69795700 | 1.82572700  |
| C  | -3.05528700 | -3.58199300 | -1.06399900 |
| H  | -3.89380500 | -3.42964500 | -0.35875400 |
| H  | -3.46182700 | -3.51249500 | -2.08534300 |
| H  | -2.61454200 | -4.57202500 | -0.88068300 |
| C  | -0.77450200 | 1.09775600  | 3.18067300  |
| H  | -0.84980800 | 0.47965000  | 4.08998500  |
| H  | 0.28239400  | 1.07820400  | 2.85886200  |
| H  | -1.06835200 | 2.13546400  | 3.39089100  |
| Cu | 0.22207300  | -1.79305200 | 1.06871600  |
| O  | 2.00318300  | -1.04294000 | 1.45088200  |
| S  | 2.18867000  | 0.18536200  | 0.59113200  |
| O  | 0.83313400  | 0.45720900  | -0.03061000 |
| O  | 2.82844300  | 1.34250500  | 1.18869200  |
| C  | 3.26920900  | -0.41743500 | -0.80616100 |
| F  | 2.68233700  | -1.46773400 | -1.38047800 |
| F  | 3.39805200  | 0.55475300  | -1.70176300 |
| F  | 4.44753500  | -0.76029800 | -0.33315200 |
| O  | 0.29622100  | 2.94115500  | -0.14784400 |
| H  | 0.29229600  | 1.94858500  | -0.00289700 |

|   |             |            |             |
|---|-------------|------------|-------------|
| C | -0.44160700 | 4.05938300 | 0.33693000  |
| H | -0.23761400 | 4.19766800 | 1.41212900  |
| H | -0.05901400 | 4.93193000 | -0.21540700 |
| H | -1.52863200 | 3.99032100 | 0.19274500  |

## II.II Cu-OTf directed attack by *p*-OMePhOH IM4 $\alpha$ '

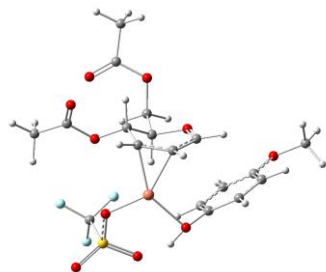

1 2

Electronic energy: -3787.227385

Thermal corrections: 0.322812

|    |             |             |             |
|----|-------------|-------------|-------------|
| O  | 2.02682800  | 1.17733100  | -0.32231600 |
| C  | 0.56094300  | 0.71521900  | -2.20682700 |
| C  | -0.27113300 | 1.33414700  | 0.07888400  |
| C  | -0.76948700 | 0.43549900  | -2.55735000 |
| H  | 1.36760400  | 0.66703500  | -2.94701700 |
| H  | -0.24622400 | 0.30089400  | 0.45923300  |
| C  | -1.80995100 | 0.95430600  | -1.71121500 |
| H  | -1.05684700 | 0.11084100  | -3.56229700 |
| O  | -1.60022400 | 1.46579100  | -0.56170800 |
| C  | -0.23432400 | 2.28287500  | 1.25758300  |
| H  | 0.67070600  | 2.05393800  | 1.84016500  |
| H  | -1.13214300 | 2.11921900  | 1.87348000  |
| H  | -2.84174800 | 1.05958200  | -2.05783400 |
| O  | -0.24453600 | 3.64012800  | 0.84844300  |
| C  | 0.82797800  | 1.52914000  | -0.96300000 |
| H  | 0.87806300  | 2.58328800  | -1.29683200 |
| C  | 0.95047500  | 4.31503200  | 0.86746800  |
| C  | 3.16846300  | 1.75382300  | -0.85295000 |
| O  | 3.11115700  | 2.38255300  | -1.87375000 |
| O  | 1.99293100  | 3.76573100  | 1.10751800  |
| C  | 4.35956500  | 1.47143700  | 0.00226500  |
| H  | 4.22258000  | 1.98431900  | 0.97033100  |
| H  | 4.43800000  | 0.39051300  | 0.19846300  |
| H  | 5.26564300  | 1.84376200  | -0.49520800 |
| C  | 0.75049500  | 5.77250700  | 0.56964600  |
| H  | 1.71733400  | 6.23489200  | 0.32575100  |
| H  | 0.03049000  | 5.91163500  | -0.25280800 |
| H  | 0.32907900  | 6.26666100  | 1.46384200  |
| Cu | 0.14416500  | -1.20043000 | -1.64872100 |
| O  | 2.88387000  | -3.80555200 | 0.18355700  |
| S  | 1.78509200  | -2.87082400 | 0.26525600  |
| O  | 1.77308200  | -1.83336700 | -0.86716900 |
| O  | 0.40885300  | -3.39213100 | 0.51216400  |
| C  | 2.09932000  | -1.79287100 | 1.76218100  |
| F  | 3.24508000  | -1.14303100 | 1.63505300  |
| F  | 1.10239200  | -0.88653400 | 1.87399900  |
| F  | 2.11799500  | -2.53323800 | 2.85147200  |
| O  | -1.35138300 | -2.46392400 | -1.07764700 |
| H  | -0.80331600 | -3.03313800 | -0.43165600 |

|   |             |             |             |
|---|-------------|-------------|-------------|
| C | -2.34200900 | -1.75532000 | -0.40793300 |
| C | -2.19995300 | -1.41244400 | 0.94357300  |
| C | -3.47481400 | -1.35215200 | -1.12136300 |
| C | -3.17885100 | -0.64091600 | 1.55896200  |
| H | -1.32959000 | -1.76057800 | 1.50363900  |
| C | -4.46911300 | -0.58418500 | -0.49607400 |
| H | -3.59466300 | -1.68060100 | -2.15742600 |
| C | -4.32296200 | -0.21051900 | 0.84896200  |
| H | -3.09548700 | -0.36625500 | 2.61329700  |
| H | -5.35769600 | -0.30586700 | -1.06418200 |
| O | -5.19965200 | 0.52996300  | 1.54243700  |
| C | -6.41179000 | 0.93964800  | 0.93287200  |
| H | -6.96508700 | 1.50166000  | 1.69849600  |
| H | -6.22060600 | 1.59743600  | 0.06372800  |
| H | -7.01206800 | 0.06812200  | 0.61260100  |

### TS4 $\alpha'$

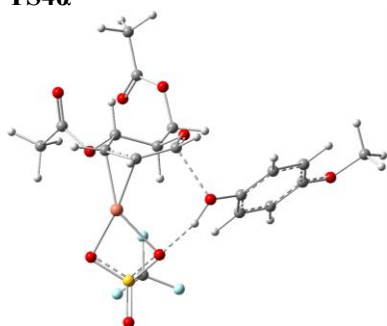

1 2

Electronic energy: -3787.214139

Thermal corrections: 0.323938

|   |             |             |             |
|---|-------------|-------------|-------------|
| O | 2.60009400  | -0.99859400 | -0.10468200 |
| C | 1.91566100  | -0.35144600 | 2.10938600  |
| C | 0.29796300  | -1.21324900 | 0.40451600  |
| C | 0.79658700  | 0.09376100  | 2.81594700  |
| H | 2.92722700  | -0.24353700 | 2.51759700  |
| H | 0.12962400  | -0.21663500 | -0.03559000 |
| C | -0.49864600 | -0.51964800 | 2.52089600  |
| H | 0.88758500  | 0.59985600  | 3.78332800  |
| O | -0.64639700 | -1.32345200 | 1.52281100  |
| C | -0.06170600 | -2.25451400 | -0.63369400 |
| H | 0.40363700  | -1.97103300 | -1.58951100 |
| H | -1.15751000 | -2.27548800 | -0.74783800 |
| H | -1.21671700 | -0.67796900 | 3.32806000  |
| O | 0.37999000  | -3.54445000 | -0.24460700 |
| C | 1.72119200  | -1.30671600 | 0.95931600  |
| H | 1.92876200  | -2.33099500 | 1.31950000  |
| C | 1.35726500  | -4.12849800 | -1.01268700 |
| C | 3.64639600  | -1.88211600 | -0.32207800 |
| O | 3.84392400  | -2.80473100 | 0.41899500  |
| O | 1.82886800  | -3.58146200 | -1.97517000 |
| C | 4.39211600  | -1.53126200 | -1.56917000 |
| H | 3.87085800  | -2.03089300 | -2.40643200 |
| H | 4.38891400  | -0.44552800 | -1.74965300 |
| H | 5.41811000  | -1.92250200 | -1.50909700 |
| C | 1.77092500  | -5.45696200 | -0.45538000 |
| H | 2.10419000  | -6.11059800 | -1.27541000 |
| H | 2.63406300  | -5.28248900 | 0.21360000  |



|    |             |             |             |
|----|-------------|-------------|-------------|
| H  | 0.96124000  | -5.92769600 | 0.12158000  |
| Cu | 1.36329700  | 1.50329400  | 1.44048700  |
| O  | 2.16052300  | 2.81207400  | 0.12086000  |
| S  | 0.82350200  | 3.39703100  | -0.29182900 |
| O  | -0.18106000 | 2.69021300  | 0.62980100  |
| O  | 0.69579600  | 4.82397500  | -0.44724500 |
| C  | 0.50438300  | 2.60027800  | -1.95756200 |
| F  | 0.64405200  | 1.27072100  | -1.83091300 |
| F  | -0.73516600 | 2.86161900  | -2.34709800 |
| F  | 1.36844600  | 3.05101500  | -2.83831300 |
| O  | -1.80258000 | 1.02500900  | 1.95186900  |
| H  | -1.31979000 | 1.77114300  | 1.50469800  |
| C  | -2.74960700 | 0.49178400  | 1.09798900  |
| C  | -2.65395100 | 0.65512000  | -0.29312600 |
| C  | -3.78328300 | -0.26616000 | 1.65301100  |
| C  | -3.60215500 | 0.06872000  | -1.11832900 |
| H  | -1.86275200 | 1.27173500  | -0.72029400 |
| C  | -4.73050800 | -0.86645100 | 0.82604800  |
| H  | -3.85320300 | -0.37297900 | 2.73867100  |
| C  | -4.64880300 | -0.70555000 | -0.57240700 |
| H  | -3.56596400 | 0.20121800  | -2.20176000 |
| H  | -5.53563200 | -1.44744100 | 1.27659200  |
| O  | -5.50775900 | -1.23754600 | -1.44998000 |
| C  | -6.60995500 | -2.00375000 | -0.99108800 |
| H  | -7.27236000 | -1.40031900 | -0.34364900 |
| H  | -7.16161600 | -2.31229600 | -1.89031800 |
| H  | -6.27072500 | -2.90209300 | -0.44273900 |

### IM5a'

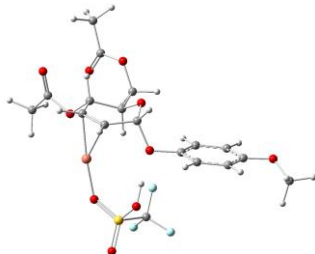

1 2

Electronic energy: -3787.238794

Thermal corrections: 0.3240211

|   |             |             |             |
|---|-------------|-------------|-------------|
| O | 3.29112400  | -0.57228000 | 0.03411100  |
| C | 2.11524000  | -0.35072800 | -2.03120500 |
| C | 1.52485100  | 1.02614600  | -0.02065000 |
| C | 0.82027900  | -0.16353600 | -2.44035100 |
| H | 2.81800500  | -0.92477300 | -2.64807700 |
| H | 0.94431100  | 0.24334500  | 0.50887100  |
| C | -0.03577500 | 0.91239800  | -1.80198000 |
| H | 0.44836800  | -0.60612400 | -3.37212600 |
| O | 0.65737200  | 1.71314500  | -0.92268900 |
| C | 2.03181200  | 1.99160400  | 1.04464300  |
| H | 2.34875500  | 1.41494200  | 1.92577900  |
| H | 1.21826000  | 2.68163400  | 1.31712400  |
| H | -0.44047700 | 1.57410300  | -2.58191100 |
| O | 3.12240000  | 2.77098800  | 0.57650700  |
| C | 2.65452900  | 0.37441000  | -0.82423300 |
| H | 3.38265800  | 1.13523700  | -1.14370900 |
| C | 4.36152200  | 2.47099600  | 1.07621900  |

|    |             |             |             |
|----|-------------|-------------|-------------|
| C  | 4.67909400  | -0.54008300 | 0.07103100  |
| O  | 5.30366700  | 0.12897600  | -0.70285500 |
| O  | 4.53862200  | 1.59015300  | 1.87975000  |
| C  | 5.21129800  | -1.41470200 | 1.16045200  |
| H  | 5.21289900  | -0.80376900 | 2.08192900  |
| H  | 4.57446400  | -2.29757600 | 1.32557500  |
| H  | 6.24469000  | -1.71022800 | 0.92840300  |
| C  | 5.41707100  | 3.37169300  | 0.50871000  |
| H  | 6.20215600  | 3.53775400  | 1.26187000  |
| H  | 5.87570900  | 2.84397000  | -0.34808000 |
| H  | 4.99663500  | 4.32577700  | 0.15826200  |
| Cu | 0.96056300  | -1.77724600 | -1.03557200 |
| O  | -0.17539300 | -2.92921700 | -0.01401900 |
| S  | -1.66816600 | -2.98496900 | 0.10725200  |
| O  | -2.29959400 | -2.08040000 | -1.02278800 |
| O  | -2.31660700 | -4.26262600 | 0.15680200  |
| C  | -2.00560300 | -2.00816600 | 1.68454600  |
| F  | -1.41938800 | -0.81528100 | 1.55162700  |
| F  | -3.30213200 | -1.86014900 | 1.83742100  |
| F  | -1.47740300 | -2.65544900 | 2.69937900  |
| O  | -1.16106700 | 0.25476600  | -1.15964300 |
| H  | -1.84316800 | -1.16274100 | -1.13918500 |
| C  | -2.21790500 | 1.09107800  | -0.72527400 |
| C  | -2.11308400 | 1.80629400  | 0.46006700  |
| C  | -3.37646900 | 1.13199000  | -1.50502500 |
| C  | -3.19967900 | 2.58222300  | 0.87242700  |
| H  | -1.22190100 | 1.74402300  | 1.08471700  |
| C  | -4.45614100 | 1.90964200  | -1.09285600 |
| H  | -3.42654600 | 0.57135900  | -2.44136100 |
| C  | -4.37073000 | 2.64248600  | 0.10679600  |
| H  | -3.15484500 | 3.15629300  | 1.79861100  |
| H  | -5.34998700 | 1.95950500  | -1.71471200 |
| O  | -5.34303300 | 3.46890100  | 0.55057900  |
| C  | -6.69956900 | 3.12782400  | 0.26919900  |
| H  | -7.31383300 | 3.93477300  | 0.70480400  |
| H  | -6.91370200 | 3.06884300  | -0.81653500 |
| H  | -6.96218500 | 2.16254800  | 0.74836600  |

### IM4β'

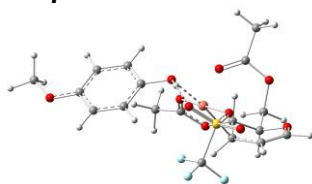

1 2

Electronic energy: -3787.229597

Thermal corrections: 0.329167

|   |             |             |             |
|---|-------------|-------------|-------------|
| O | -1.92749600 | -1.44920100 | -1.51564600 |
| C | -1.73473800 | 0.91433600  | -0.94712500 |
| C | -3.95568700 | -0.23123400 | -1.19485300 |
| C | -2.45299500 | 2.07929300  | -0.62837500 |
| H | -0.91662400 | 0.96292500  | -1.67799100 |
| H | -4.01131300 | -0.01258100 | -2.27751700 |
| C | -3.80100100 | 1.98741300  | -0.32957200 |
| H | -1.96991200 | 3.05584700  | -0.61005900 |
| O | -4.52894400 | 0.90378900  | -0.50466200 |
| C | -4.82833700 | -1.44376700 | -0.90106400 |

|    |             |             |             |
|----|-------------|-------------|-------------|
| H  | -4.42807400 | -2.30987700 | -1.44997700 |
| H  | -5.85230900 | -1.22590200 | -1.23943000 |
| H  | -4.39691200 | 2.83749200  | 0.01863000  |
| O  | -4.93289400 | -1.73045900 | 0.48891900  |
| C  | -2.49731800 | -0.37799300 | -0.77086200 |
| H  | -2.49937100 | -0.65755400 | 0.29499300  |
| C  | -4.08520700 | -2.63582800 | 1.03927200  |
| C  | -0.81675200 | -1.96943000 | -1.00778000 |
| O  | -0.17923300 | -1.38769300 | -0.12923900 |
| O  | -3.13147700 | -3.07968200 | 0.44324900  |
| C  | -0.44145600 | -3.29953000 | -1.55431300 |
| H  | -1.05396900 | -4.04627300 | -1.01427200 |
| H  | -0.69232300 | -3.36669800 | -2.62465200 |
| H  | 0.62531800  | -3.49581200 | -1.37511200 |
| C  | -4.49851300 | -2.98736600 | 2.43905300  |
| H  | -3.68921300 | -3.53637200 | 2.94052100  |
| H  | -4.76753500 | -2.08035900 | 3.00468900  |
| H  | -5.40038900 | -3.62464200 | 2.39855500  |
| Cu | -0.08130100 | 0.48417100  | 0.46457800  |
| O  | 2.25124400  | 2.59182700  | 1.49910800  |
| S  | 1.05261400  | 3.26241400  | 0.94546800  |
| O  | -0.17271600 | 2.32804800  | 0.98881500  |
| O  | 0.72841900  | 4.61363600  | 1.34507900  |
| C  | 1.36065400  | 3.28897500  | -0.90154600 |
| F  | 1.53152900  | 2.01179400  | -1.32401600 |
| F  | 0.29772900  | 3.78214800  | -1.53551400 |
| F  | 2.43156800  | 3.98625800  | -1.20427100 |
| O  | 1.63028100  | 0.06474700  | 1.57264600  |
| H  | 2.00502500  | 0.98546500  | 1.73276800  |
| C  | 2.58437900  | -0.75703100 | 0.99781100  |
| C  | 2.49455800  | -2.13360100 | 1.20855500  |
| C  | 3.60377900  | -0.22287300 | 0.19445600  |
| C  | 3.42318000  | -2.99333000 | 0.61958400  |
| H  | 1.69705900  | -2.52377800 | 1.84405100  |
| C  | 4.53263500  | -1.07435900 | -0.38606700 |
| H  | 3.66813500  | 0.85680300  | 0.04256100  |
| C  | 4.45453800  | -2.46875000 | -0.18329400 |
| H  | 3.34911400  | -4.06505200 | 0.80799100  |
| H  | 5.34598700  | -0.68650400 | -1.00326800 |
| O  | 5.40168300  | -3.20644400 | -0.78715200 |
| C  | 5.43537700  | -4.60689000 | -0.59199300 |
| H  | 4.51531800  | -5.08925200 | -0.97375700 |
| H  | 6.30048900  | -4.97570900 | -1.16170000 |
| H  | 5.56646800  | -4.86030600 | 0.47667500  |

### TS4β'

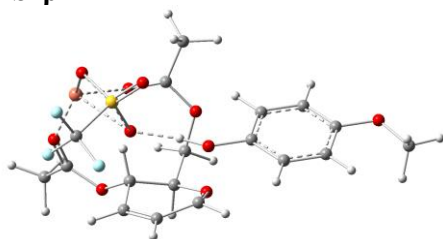

1 2

Electronic energy: -3787.2355482

Thermal corrections: 0.3281563

O -2.38226700 -1.34839200 -1.39291000

|    |             |             |             |
|----|-------------|-------------|-------------|
| C  | -0.63503700 | 0.13156600  | -2.29195600 |
| C  | -2.59345600 | 0.94643600  | -0.96627500 |
| C  | -0.26878300 | 1.41052700  | -2.51895200 |
| H  | -0.16586000 | -0.70151300 | -2.82451000 |
| H  | -3.29839264 | 0.77430604  | -1.79855542 |
| C  | -0.88618500 | 2.48359500  | -1.75825300 |
| H  | 0.51142600  | 1.67734900  | -3.23499900 |
| O  | -2.03981400 | 2.26529000  | -1.18590400 |
| C  | -3.43488162 | 0.80615734  | 0.29391585  |
| H  | -3.78296218 | -0.23364458 | 0.38490435  |
| H  | -4.30132534 | 1.47994288  | 0.23674489  |
| H  | -0.69476100 | 3.51174900  | -2.05704700 |
| O  | -2.70888593 | 1.21501367  | 1.45719623  |
| C  | -1.58385600 | -0.18236500 | -1.17788000 |
| H  | -0.97090400 | -0.35192600 | -0.29239200 |
| C  | -2.01870221 | 0.30996011  | 2.17293764  |
| C  | -2.02948700 | -2.52035800 | -0.82536700 |
| O  | -0.98650300 | -2.71168200 | -0.21878100 |
| O  | -1.90496225 | -0.84878128 | 1.80677678  |
| C  | -3.05528700 | -3.58199300 | -1.06399900 |
| H  | -3.89380500 | -3.42964500 | -0.35875400 |
| H  | -3.46182700 | -3.51249500 | -2.08534300 |
| H  | -2.61454200 | -4.57202500 | -0.88068300 |
| C  | -1.39225086 | 0.88951224  | 3.40208110  |
| H  | -1.53729423 | 0.19250187  | 4.24333807  |
| H  | -0.30342042 | 0.98131012  | 3.23777899  |
| H  | -1.80550535 | 1.87903242  | 3.64176396  |
| Cu | 0.22207300  | -1.79305200 | 1.06871600  |
| O  | 2.00318300  | -1.04294000 | 1.45088200  |
| S  | 2.18867000  | 0.18536200  | 0.59113200  |
| O  | 0.83313400  | 0.45720900  | -0.03061000 |
| O  | 2.82844300  | 1.34250500  | 1.18869200  |
| C  | 3.26920900  | -0.41743500 | -0.80616100 |
| F  | 2.68233700  | -1.46773400 | -1.38047800 |
| F  | 3.39805200  | 0.55475300  | -1.70176300 |
| F  | 4.44753500  | -0.76029800 | -0.33315200 |
| O  | 0.29622100  | 2.94115500  | -0.14784400 |
| H  | 0.29317219  | 1.94872876  | -0.00189503 |
| C  | -0.44434088 | 4.06352638  | 0.33872624  |
| C  | -1.33674929 | 3.90368139  | 1.39916400  |
| C  | -0.27446509 | 5.31809759  | -0.24671498 |
| C  | -2.05957727 | 4.99807745  | 1.87354645  |
| H  | -1.47101956 | 2.91431371  | 1.85999462  |
| C  | -0.99670678 | 6.41313168  | 0.22833993  |
| H  | 0.42898228  | 5.44429500  | -1.08239736 |
| C  | -1.88927024 | 6.25330336  | 1.28820898  |
| H  | -2.76346662 | 4.87203459  | 2.70898017  |
| H  | -0.86225624 | 7.40227041  | -0.23318131 |
| O  | -2.63047317 | 7.37521425  | 1.77486510  |
| C  | -2.46694239 | 8.58849666  | 1.03587696  |
| H  | -3.05919510 | 9.36017032  | 1.48158594  |
| H  | -1.43678254 | 8.87749520  | 1.04814619  |
| H  | -2.78248740 | 8.43566475  | 0.02494979  |

**II.III Sc-OTf directed attack**  
**IM5a\_Sc**

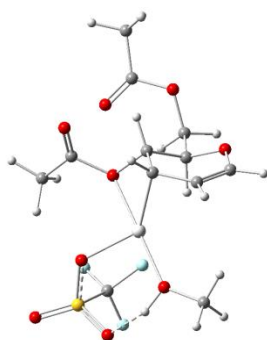

3 1

Electronic energy: -2601.580906

Thermal corrections: 0.2041366

|    |             |             |             |
|----|-------------|-------------|-------------|
| O  | 1.30824100  | -1.24790300 | 0.19968600  |
| C  | 1.03557000  | 0.87373100  | -1.11738200 |
| C  | 2.21092700  | 0.70102000  | 1.13377200  |
| C  | 0.98041200  | 2.26750000  | -0.99832600 |
| H  | 0.63911400  | 0.33427800  | -1.99553800 |
| H  | 1.44047100  | 0.56018300  | 1.91167300  |
| C  | 1.73634200  | 2.85548800  | 0.07246200  |
| H  | 0.68622200  | 2.93081700  | -1.82623100 |
| O  | 2.31440000  | 2.18375400  | 0.98122400  |
| C  | 3.55113400  | 0.22761300  | 1.70300100  |
| H  | 3.52059000  | -0.86961700 | 1.81538800  |
| H  | 3.67703700  | 0.68157800  | 2.69780700  |
| H  | 1.91710600  | 3.94169300  | 0.13281100  |
| O  | 4.69542200  | 0.60706100  | 0.94293700  |
| C  | 1.77444600  | 0.03553300  | -0.17442200 |
| H  | 2.79433900  | -0.14865700 | -0.74495900 |
| C  | 5.14544800  | -0.07237200 | -0.13699900 |
| C  | 1.31382800  | -2.31830900 | -0.74544600 |
| O  | 1.52331300  | -2.06002000 | -1.88799000 |
| O  | 4.43220500  | -0.82460900 | -0.79174500 |
| C  | 1.04503200  | -3.64159800 | -0.10154100 |
| H  | 1.65246400  | -3.76942600 | 0.80891000  |
| H  | -0.01813100 | -3.69585000 | 0.19547900  |
| H  | 1.25081700  | -4.45328600 | -0.81719300 |
| C  | 6.56893800  | 0.20212700  | -0.47907800 |
| H  | 6.81327000  | -0.15337900 | -1.49168100 |
| H  | 6.78837100  | 1.27944700  | -0.37381100 |
| H  | 7.20030400  | -0.32800500 | 0.26140500  |
| O  | -3.25838900 | -2.69348300 | -0.74350300 |
| S  | -3.31309700 | -1.31674600 | -0.36519900 |
| O  | -2.09486600 | -0.41923600 | -1.13116500 |
| O  | -4.47702800 | -0.44778500 | -0.31452400 |
| C  | -2.46401300 | -1.03446300 | 1.31741900  |
| F  | -1.41130900 | -1.75958500 | 1.46651100  |
| F  | -2.00692900 | 0.37228600  | 1.09122300  |
| F  | -3.27799600 | -1.03138200 | 2.29666700  |
| O  | -3.26947900 | 2.48726700  | -0.61801500 |
| H  | -4.03407700 | 1.86235300  | -0.73014400 |
| C  | -3.82074400 | 3.75028000  | -0.00540300 |
| H  | -4.08007700 | 3.52936500  | 1.04087700  |
| H  | -3.04219100 | 4.52131600  | -0.08496200 |
| H  | -4.70508900 | 4.03756300  | -0.59508400 |
| Sc | -1.57520900 | 1.37219100  | -0.66451100 |

**II.IV Cu-OTf blocked attack**  
**IM5a\_blocked\_from\_coordinated\_route**

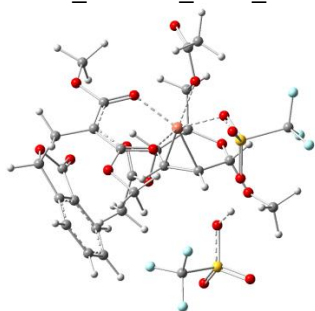

0 2

Electronic energy: -5434.491190

Thermal corrections: 0.495046

|   |             |             |             |
|---|-------------|-------------|-------------|
| O | 2.39222600  | 0.33754700  | 1.67013900  |
| C | 0.43347500  | 0.11593400  | 0.43408100  |
| C | 0.50316100  | -0.74808500 | 2.81083700  |
| C | 0.04010000  | -1.13441900 | 0.03103800  |
| H | 0.64791000  | 0.89414600  | -0.30074200 |
| H | 1.28458800  | -0.80478900 | 3.58016900  |
| H | -0.12507500 | -1.36889300 | -1.02268500 |
| O | 0.44215300  | -2.06341700 | 2.26670800  |
| C | -0.76268400 | -0.41460100 | 3.59004900  |
| H | -0.68399600 | 0.59616800  | 4.01892500  |
| H | -0.86903800 | -1.13176200 | 4.42145200  |
| O | 0.52868000  | 4.87277800  | 0.18488500  |
| O | -1.92713700 | -0.51105200 | 2.77022200  |
| C | 0.94936300  | 0.33723900  | 1.81919700  |
| H | 0.66359200  | 1.32365900  | 2.20876800  |
| C | -3.06486700 | 0.02230100  | 3.29002400  |
| C | 3.12551400  | 0.83642500  | 2.68356200  |
| O | 2.65804800  | 1.17227400  | 3.74468900  |
| O | -3.08327100 | 0.55880200  | 4.37169700  |
| C | 4.58365500  | 0.90052100  | 2.30233900  |
| H | 4.90662400  | -0.04938500 | 1.84658000  |
| H | 4.71827500  | 1.69976200  | 1.55207300  |
| H | 5.18681500  | 1.13083200  | 3.19259100  |
| C | -4.24226500 | -0.13217600 | 2.36961700  |
| H | -5.16823000 | -0.06234700 | 2.96036900  |
| H | -4.20964600 | 0.69772900  | 1.64285000  |
| H | -4.19259500 | -1.06452100 | 1.78924800  |
| C | 1.38013300  | 3.82815000  | 0.34086700  |
| O | 1.79194500  | 3.46988400  | 1.41716600  |
| C | 1.66549200  | 3.28595900  | -1.00782500 |
| C | 2.51562900  | 2.24440900  | -1.37987200 |
| C | 0.90562300  | 3.99726800  | -1.93300400 |
| C | 2.58819600  | 1.92342600  | -2.73647700 |
| H | 3.07329500  | 1.68859500  | -0.62560900 |
| C | 0.97625300  | 3.68042800  | -3.28829700 |
| C | 1.82680900  | 2.63879200  | -3.67783600 |
| H | 3.23261300  | 1.10530400  | -3.06972900 |
| H | 0.36729700  | 4.20719900  | -4.02651700 |
| H | 1.89202800  | 2.36667000  | -4.73588300 |
| C | 0.05259000  | 4.98329000  | -1.17417300 |
| H | 0.23569600  | 6.02544300  | -1.49166500 |
| C | -1.46383400 | 4.67958800  | -1.21492900 |
| H | -1.95414100 | 5.41501300  | -0.55883800 |

|    |             |             |             |
|----|-------------|-------------|-------------|
| H  | -1.80578600 | 4.86508300  | -2.24566400 |
| C  | -1.79820400 | 3.27079700  | -0.79276500 |
| C  | -1.98032100 | 2.96502400  | 0.57979000  |
| C  | -1.88829800 | 2.23113800  | -1.76837900 |
| O  | -1.99174000 | 1.01183000  | -1.58532200 |
| O  | -1.84991400 | 2.67772900  | -3.06274000 |
| O  | -2.13326900 | 1.84182800  | 1.11848900  |
| C  | -1.85424700 | 1.65901800  | -4.05245200 |
| H  | -2.69688300 | 0.96289400  | -3.90924000 |
| H  | -1.93391200 | 2.17902100  | -5.02076600 |
| H  | -0.91900900 | 1.07173300  | -4.01473300 |
| O  | -1.99673100 | 4.05342200  | 1.39238500  |
| C  | -1.85520900 | 3.81986500  | 2.78440200  |
| H  | -0.86359100 | 3.38467100  | 3.00474700  |
| H  | -1.93022600 | 4.80910900  | 3.26225800  |
| H  | -2.63622400 | 3.14697100  | 3.17474400  |
| Cu | -1.62923500 | 0.04043600  | 0.29941300  |
| O  | -2.97342000 | -1.47607400 | -0.10901600 |
| S  | -3.08952600 | -2.12143400 | -1.46896700 |
| O  | -1.79280900 | -2.40683100 | -2.11618400 |
| O  | -4.16404100 | -1.59831400 | -2.31387500 |
| C  | -3.68275300 | -3.81423400 | -0.94418900 |
| F  | -3.91495400 | -4.58761200 | -2.00889500 |
| F  | -4.80959300 | -3.73445600 | -0.23064400 |
| F  | -2.75738000 | -4.42914200 | -0.18470700 |
| C  | 0.05784300  | -2.31805700 | 0.95647200  |
| H  | -0.90922600 | -2.84934100 | 0.92952800  |
| C  | 0.66079100  | -4.14774200 | -0.55260100 |
| H  | 0.10058900  | -3.61840100 | -1.34122000 |
| H  | 1.59013700  | -4.57537300 | -0.95650000 |
| H  | 0.01720200  | -4.94476200 | -0.13794900 |
| O  | 3.38542000  | -2.54525400 | 1.04486900  |
| O  | 1.05517200  | -3.25556400 | 0.48940200  |
| H  | 2.40420400  | -2.87115300 | 0.81634800  |
| S  | 4.41143000  | -2.80653400 | -0.10983300 |
| C  | 4.02717700  | -1.38897100 | -1.27207100 |
| O  | 4.07968500  | -4.01163600 | -0.86348000 |
| O  | 5.75370700  | -2.55822200 | 0.38839500  |
| F  | 4.66900100  | -1.58055200 | -2.42426000 |
| F  | 2.72141600  | -1.32795800 | -1.51373500 |
| F  | 4.43391900  | -0.23361300 | -0.75075300 |

**IM5a\_blocked\_from\_non\_coordinated\_route**

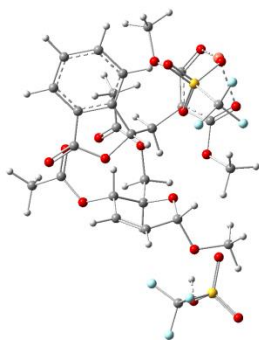

0 2

Electronic energy: -5434.453294

Thermal corrections: 0.489944

|   |             |            |            |
|---|-------------|------------|------------|
| O | -3.73528800 | 3.25650500 | 0.95848300 |
|---|-------------|------------|------------|

|   |             |             |             |
|---|-------------|-------------|-------------|
| C | -3.18323600 | 0.90516800  | 1.07177000  |
| C | -3.51442900 | 2.01986900  | -1.10834300 |
| C | -3.20787700 | -0.25925600 | 0.41900000  |
| H | -3.21845500 | 0.96058400  | 2.16265000  |
| H | -4.60284600 | 1.81599300  | -1.08774600 |
| H | -3.28081600 | -1.21363100 | 0.94290100  |
| O | -2.82762800 | 0.91181400  | -1.68167200 |
| C | -3.28881000 | 3.22936600  | -1.99611500 |
| H | -3.96633500 | 4.04541000  | -1.70653900 |
| H | -3.48157700 | 2.94341000  | -3.04363100 |
| O | -0.44920600 | 1.21273300  | 1.85683900  |
| O | -1.94070600 | 3.68078400  | -1.90516700 |
| C | -3.01081000 | 2.19229300  | 0.32491400  |
| H | -1.94781000 | 2.46375000  | 0.31288300  |
| C | -1.71772000 | 4.97103600  | -1.55930700 |
| C | -3.01198300 | 4.31065300  | 1.41233500  |
| O | -1.81144800 | 4.38038900  | 1.35330300  |
| O | -2.60406400 | 5.78112100  | -1.41550100 |
| C | -3.91063300 | 5.40298500  | 1.92804200  |
| H | -4.09329700 | 6.09839900  | 1.08823100  |
| H | -4.87414900 | 5.00484800  | 2.28088300  |
| H | -3.39385800 | 5.95298700  | 2.72894700  |
| C | -0.25397300 | 5.22859700  | -1.34046600 |
| H | 0.38169300  | 4.53628800  | -1.91082100 |
| H | -0.02616800 | 6.28073900  | -1.57242800 |
| H | -0.05854100 | 5.05431200  | -0.26752900 |
| C | -0.10305200 | 2.04188800  | 2.87478900  |
| O | -0.90513300 | 2.45413000  | 3.67687400  |
| C | 1.35860600  | 2.26143000  | 2.77665300  |
| C | 2.20019400  | 3.00403400  | 3.60638000  |
| C | 1.84261400  | 1.53340600  | 1.68806300  |
| C | 3.56711500  | 2.99286100  | 3.32182700  |
| H | 1.78779500  | 3.56058700  | 4.45269300  |
| C | 3.21001000  | 1.50544400  | 1.41188600  |
| C | 4.06213900  | 2.24175400  | 2.24013200  |
| H | 4.26304700  | 3.55467400  | 3.95284300  |
| H | 3.60791600  | 0.90330400  | 0.59647400  |
| H | 5.13928100  | 2.21216900  | 2.05018300  |
| C | 0.67732900  | 0.87781200  | 1.00114500  |
| H | 0.77158900  | -0.21816200 | 0.99255200  |
| C | 0.38531500  | 1.38223900  | -0.42416600 |
| H | -0.60519500 | 1.00923100  | -0.70944000 |
| H | 0.33125300  | 2.47818400  | -0.39464400 |
| C | 1.42204200  | 0.91946800  | -1.41226200 |
| C | 2.50204500  | 1.75013700  | -1.76438100 |
| C | 1.41354300  | -0.44739600 | -1.84232100 |
| O | 2.23668500  | -1.02551500 | -2.56112700 |
| O | 0.34940900  | -1.15962100 | -1.34696900 |
| O | 3.58608600  | 1.44206700  | -2.33496300 |
| C | 0.43427500  | -2.57168500 | -1.50459200 |
| H | 1.35347300  | -2.94948200 | -1.02832900 |
| H | -0.46000800 | -2.98729800 | -1.01539900 |
| H | 0.44584300  | -2.85235900 | -2.57211200 |
| O | 2.35513700  | 3.06151600  | -1.39179100 |
| C | 3.51400800  | 3.86899000  | -1.44213600 |
| H | 3.91396400  | 3.94569900  | -2.46774600 |
| H | 3.20521100  | 4.86267600  | -1.07941000 |



|    |             |             |             |
|----|-------------|-------------|-------------|
| H  | 4.30633700  | 3.46546700  | -0.78635400 |
| Cu | 4.23503800  | -0.33671700 | -1.84580800 |
| O  | 5.04494700  | -1.76450100 | -0.82781300 |
| S  | 4.42359200  | -1.96895900 | 0.54425100  |
| O  | 2.98577500  | -1.64457700 | 0.59872500  |
| O  | 5.26598300  | -1.50115700 | 1.64704200  |
| C  | 4.47176800  | -3.82943000 | 0.65241600  |
| F  | 4.01189000  | -4.23182600 | 1.84104400  |
| F  | 3.71087000  | -4.38215200 | -0.29850500 |
| F  | 5.71842000  | -4.28734400 | 0.50971300  |
| C  | -3.01352900 | -0.32165500 | -1.06641200 |
| H  | -2.12416200 | -0.91971000 | -1.32532200 |
| C  | -3.97899200 | -1.41345200 | -2.98318900 |
| H  | -4.94178700 | -1.81878300 | -3.33187800 |
| H  | -3.67976000 | -0.55992800 | -3.61232900 |
| H  | -3.20457700 | -2.20044700 | -3.01844900 |
| O  | -4.17652500 | -0.97265700 | -1.64066400 |
| O  | -5.28152500 | -2.87777600 | -0.44929100 |
| H  | -4.82704900 | -2.02308300 | -0.86709900 |
| S  | -4.25937000 | -4.08061400 | -0.35700200 |
| O  | -4.85553000 | -5.29285800 | -0.88649500 |
| O  | -2.92552000 | -3.63973300 | -0.75856500 |
| C  | -4.21824200 | -4.31084300 | 1.49878000  |
| F  | -3.39260600 | -5.31125900 | 1.78162900  |
| F  | -5.43354600 | -4.60290100 | 1.94765000  |
| F  | -3.78642200 | -3.20490300 | 2.09977600  |

## Supplementary References

1. T. Zamysłowski, K. Gorczyca, Y. Zhang, M. Poterała, M. Malinowski, Operationally simple enzymatic deprotection of C-3 position on 3,4,6-tri-*O*-acetyl-D-glucal, *Carbohydr. Res.* 2023, **529**, 108848.
2. H. Ding, J. Lyu, X.-L. Zhang, X. Xiao, X.-W. Liu, Efficient and versatile formation of glycosidic bonds via catalytic strain-release glycosylation with glycosyl *ortho*-2,2-dimethoxycarbonylcyclopropylbenzoate donors, *Nat. Commun.* 2023, **14**, 4010.
3. Y. Mori, H. Hayashi, Practical Synthesis of 1,3-*O*-Di-*tert*-butylsilylene-Protected D- and L-Erythritols as a Four-Carbon Chiral Building Block, *J. Org. Chem.* 2001, **66**, 8666–8668.
4. L. Alberch, G. Cheng, S.-K. Seo, X. Li, F. P. Boulineau, A. Wei, Stereoelectronic Factors in the Stereoselective Epoxidation of Glycals and 4-Deoxypentenoses, *J. Org. Chem.* 2011, **76**, 2532–2547.
5. M. Filice, J. M. Guisan, M. Terreni, J. M. Palomo, Regioselective monodeprotection of peracetylated carbohydrates, *Nat. Protoc.* 2012, **7**, 1783–1796.
6. S. Yalamanchili, T.-A. Nguyen, A. Zsikla, G. Stamper, A. E. DeYong, J. Florek, O. Vasquez, N. L. B. Pohl, C. S. Bennett, Automated, Multistep Continuous-Flow Synthesis of 2,6-Dideoxy and 3-Amino-2,3,6-trideoxy Monosaccharide Building Blocks, *Angew. Chem. Int. Ed.* 2021, **60**, 23171–23175.
7. S. Zhang, Y. Ma, J. Li, J. Ma, B. Yu, X. Xie, Molecular matchmaking between the popular weight-loss herb *Hoodia gordonii* and GPR119, a potential drug target for metabolic disorder, *Proc. Natl. Acad. Sci. U.S.A.* 2014, **111**, 14571–14576.
8. K. B. Pal, J. Lee, M. Das, X.-W. Liu, Palladium(II)-catalyzed stereoselective synthesis of C-glycosides from glycals with diaryliodonium salts, *Org. Biomol. Chem.* 2020, **18**, 2242–2251.
9. W. Yuan, Y. Liu, C. Li, From the Studies of Hydration and Hydrolysis Reactions to the Discovery of a New Organocatalyst and Its Further Applications in Acetalization and Glycosylation, *Asian J. Org. Chem.* 2017, **6**, 1428–1439.
10. E. I. Balmond, D. Benito-Alifonso, D. M. Coe, R. W. Alder, E. M. McGarrigle, M. C. Galan, A 3,4-trans-Fused Cyclic Protecting Group Facilitates  $\alpha$ -Selective Catalytic Synthesis of 2-Deoxyglycosides, *Angew. Chem. Int. Ed.* 2014, **53**, 8190–8194.
11. F. J. Reyes-Zurita, M. Medina-O'Donnell, R. M. Ferrer-Martin, E. E. Rufino-Palomares, S. Martin-Fonseca, F. Rivas, A. Martínez, A. García-Granados, A. Pérez-Jiménez, L. García-Salguero, J. Peragón, K. Mokhtari, P. P. Medina, A. Parra, J. A. Lupiáñez, The oleanolic acid derivative, 3-*O*-succinyl-28-*O*-benzyl oleanolate, induces apoptosis in B16-F10 melanoma cells *via* the mitochondrial apoptotic pathway, *RSC Adv.* 2016, **6**, 93590–93601.
12. E. I. Balmond, D. M. Coe, M. C. Galan, E. M. McGarrigle,  $\alpha$ -Selective Organocatalytic Synthesis of 2-Deoxygalactosides, *Angew. Chem. Int. Ed.* 2012, **51**, 9152–9155.
13. D. B. Werz, P. H. Seeberger, Total Synthesis of Antigen *Bacillus Anthracis* Tetrasaccharide—Creation of an Anthrax Vaccine Candidate, *Angew. Chem. Int. Ed.* 2005, **44**, 6315–6318.
14. T. Ogawa, K. Katano, K. Sasajima, M. Matsui, Synthetic studies on cell surface glycans 3: Branching pentasaccharides of glycoprotein, *Tetrahedron* 1981, **37**, 2779–2786
15. N. Floyd, B. Vijayakrishnan, J. R. Koeppe, B. G. Davis, Thiol Glycosylation of Olefinic Proteins: S-Linked Glycoconjugate Synthesis, *Angew. Chem. Int. Ed.* 2009, **48**, 7798–7802.

16. Y. Liu, T. Song, W. Meng, Y. Xu, P. G. Wang, W. Zhao, Hafnium(IV) triflate as a highly efficient catalyst for Ferrier rearrangement of *O*- and *S*-nucleophiles with glycals, *Tetrahedron Lett.* 2016, **57**, 2758–2762.
17. K. De, J. Legros, B. Crousse, D. Bonnet-Delpon, Synthesis of 2,3-unsaturated glycosides via metal-free Ferrier reaction, *Tetrahedron* 2008, **64**, 10497–10500.
18. B. K. Gorityala, S. Cai, J. Ma, X.-W. Liu, (*S*)-Camphorsulfonic acid catalyzed highly stereoselective synthesis of pseudoglycosides, *Bioorg. Med. Chem. Lett.* 2009, **19**, 3093–3095.
19. G. Narasimha, B. Srinivas, P. R. Krishna, S. Kashyap, Zn(OTf)<sub>2</sub>-Catalyzed Glycosylation of Glycals: Synthesis of 2,3-Unsaturated Glycosides via a Ferrier Reaction, *Synlett* 2014, **25**, 523–526.
20. B. Srinivas, T. R. Reddy, P. R. Krishna, S. Kashyap, Copper(II) Triflate as a Mild and Efficient Catalyst for Ferrier Glycosylation: Synthesis of 2,3-Unsaturated *O*-Glycosides, *Synlett* 2014, **25**, 1325–1330.
21. P. Chen, S. Li, Y(OTf)<sub>3</sub> as a highly efficient catalyst in Ferrier Rearrangement for the synthesis of *O*- and *S*-2,3-unsaturated glycopyranosides, *Tetrahedron Lett.* 2014, **55**, 5813–5816.
22. M. Takumi, H. Sakaue, A. Nagaki, Flash Electrochemical Approach to Carbocations, *Angew. Chem. Int. Ed.* 2022, **61**, e202116177.
23. H. Grugel, F. Albrecht, M. M. K. Boysen, *pseudo* Enantiomeric Carbohydrate Olefin Ligands – Case Study and Application in Kinetic Resolution in Rhodium(I)-Catalysed 1,4-Addition, *Adv. Synth. Catal.* 2014, **356**, 3289–3294.
24. J. Zhou, H. Chen, J. Shan, J. Li, G. Yang, X. Chen, K. Xin, J. Zhang, J. Tang, FeCl<sub>3</sub>·6H<sub>2</sub>O/C: An Efficient and Recyclable Catalyst for the Synthesis of 2,3-Unsaturated *O*- and *S*-Glycosides, *J. Carbohydr. Chem.* 2014, **33**, 313–325.
25. A. Sau, C. Palo-Nieto, M. C. Galan, Substrate-Controlled Direct  $\alpha$ -Stereoselective Synthesis of Deoxyglycosides from Glycals Using B(C<sub>6</sub>F<sub>5</sub>)<sub>3</sub> as Catalyst, *J. Org. Chem.* 2019, **84**, 2415–2424.
26. J. Wang, C. Deng, Q. Zhang, Y. Chai, Tuning the Chemoselectivity of Silyl Protected Rhamnals by Temperature and Brønsted Acidity: Kinetically Controlled 1,2-Addition vs Thermodynamically Controlled Ferrier Rearrangement, *Org. Lett.* 2019, **21**, 1103–1107.
27. P. Chen, B. Bi, Preparation of 2,3-unsaturated pseudoglycosides with Ferrier Rearrangement promoted by Tm(OTf)<sub>3</sub> as a highly efficient catalyst, *Tetrahedron Lett.* 2015, **56**, 4895–4899.
28. M.-C. Yuan, T.-K. Yeh, C.-T. Chen, J.-S. Song, Y.-C. Huang, T.-C. Hsieh, C.-Y. Huang, Y.-L. Huang, M.-H. Wang, S.-H. Wu, C.-H. Yao, Y.-S. Chao, J.-C. Lee, Identification of an oxime-containing C-glycosylarene as a potential inhibitor of sodium-dependent glucose co-transporter 2, *Eur. J. Med. Chem.* 2018, **143**, 611–620.

# NMR Spectra

## <sup>1</sup>H spectrum for S1

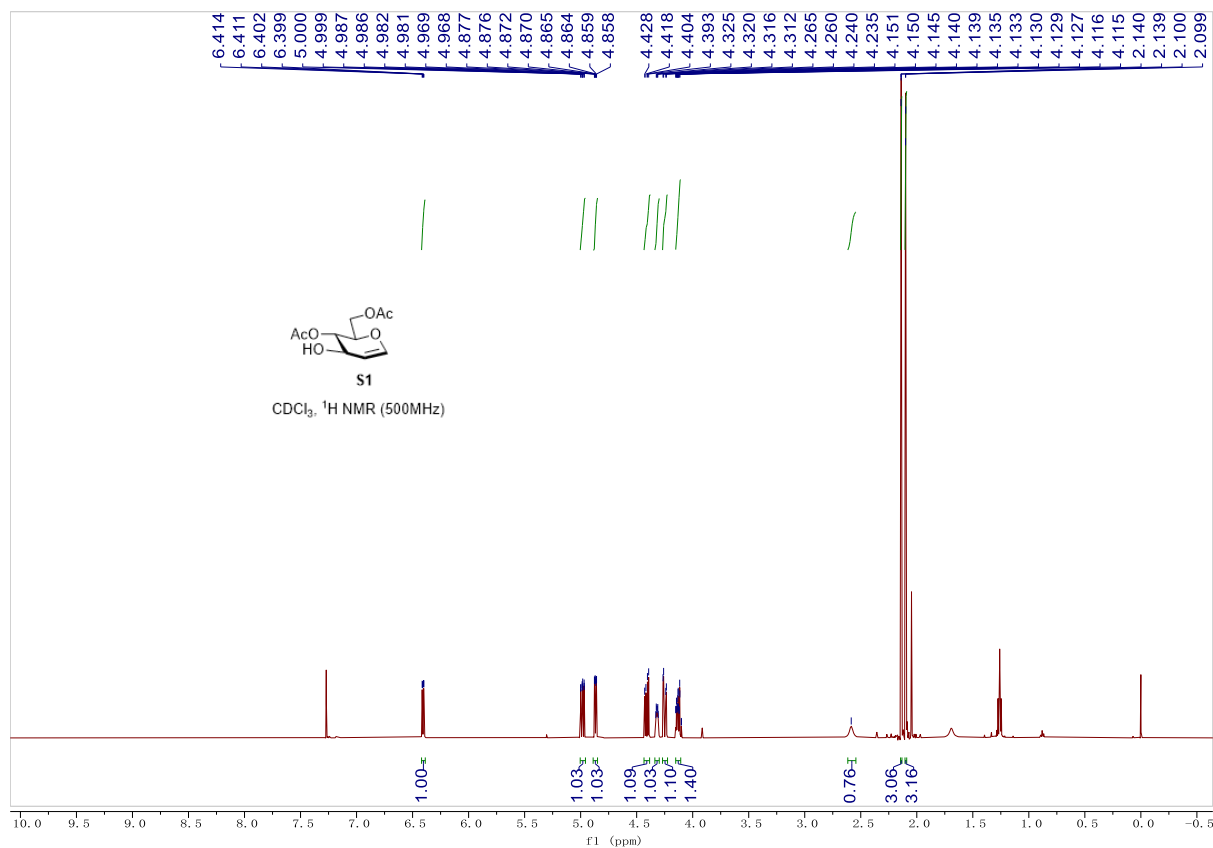

## <sup>1</sup>H spectrum for S7

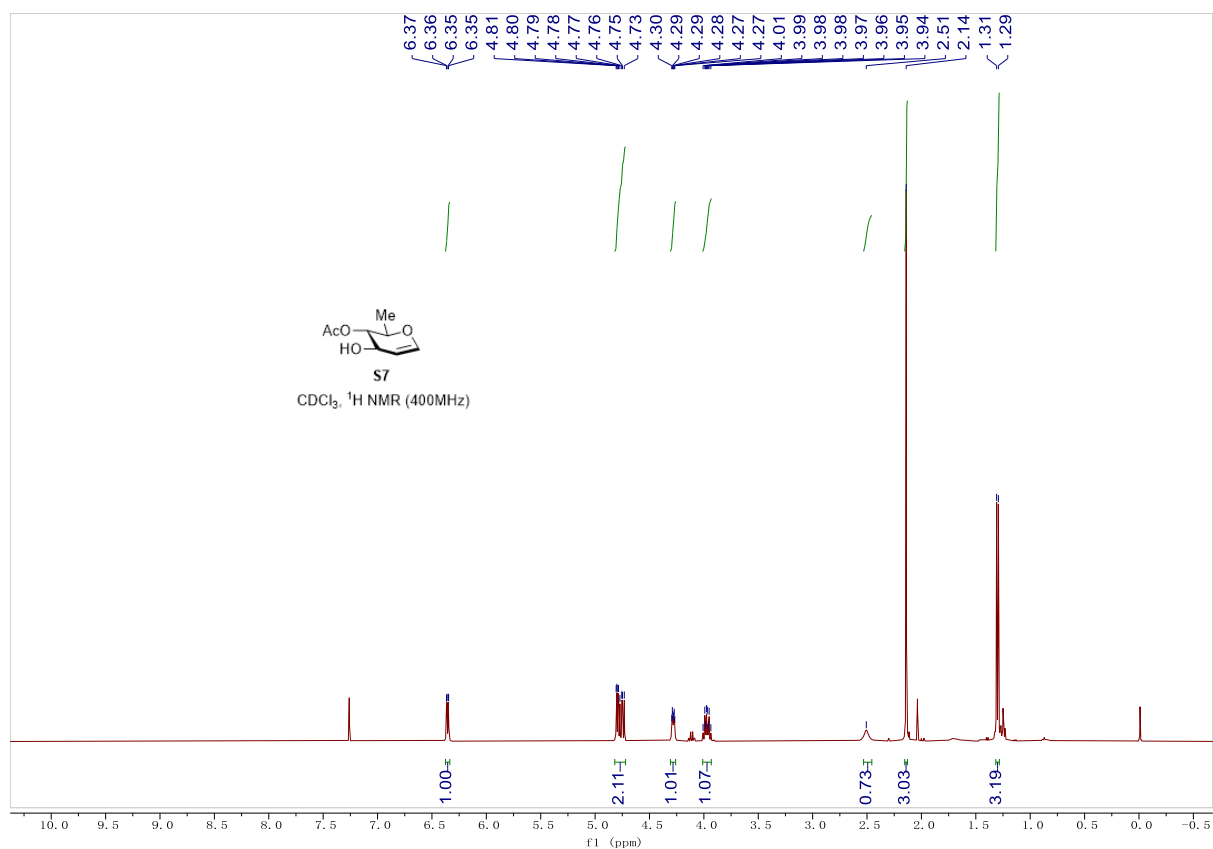

### <sup>1</sup>H spectrum for 5a

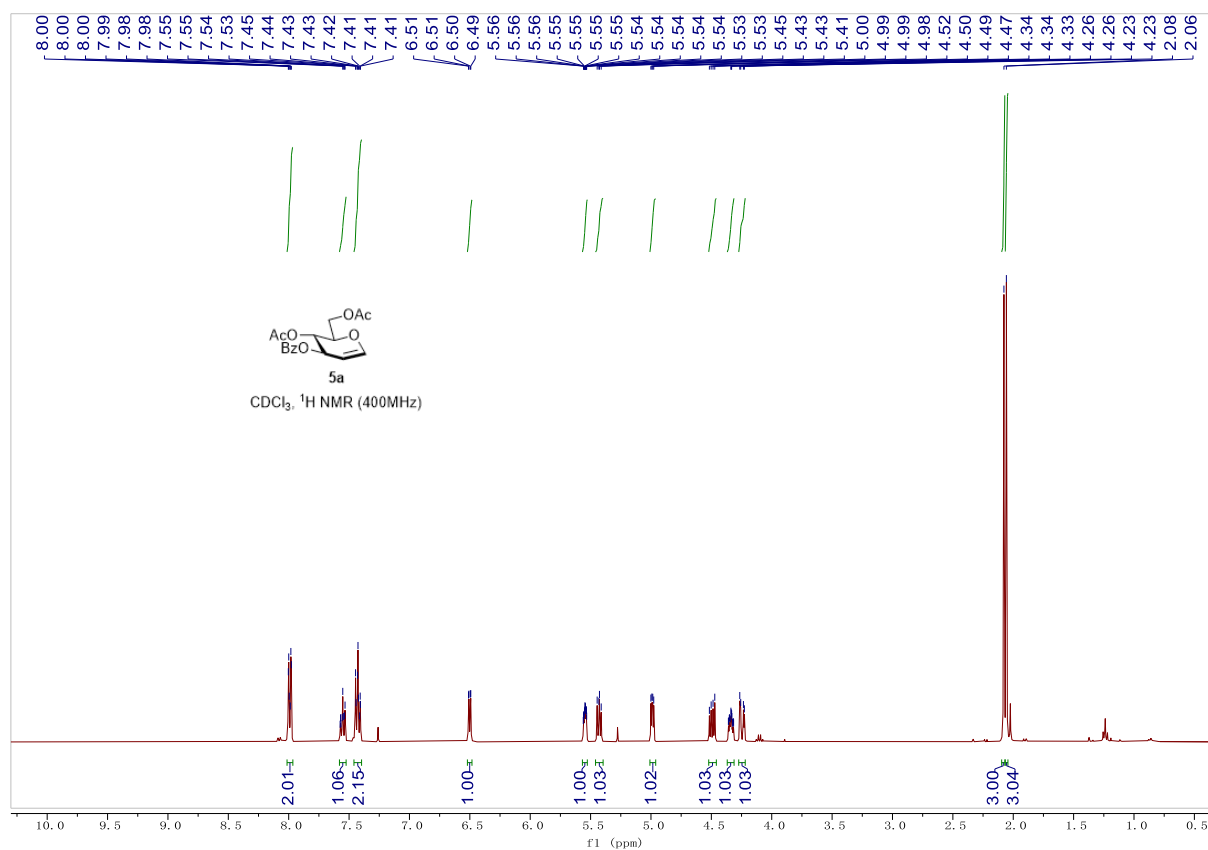

### <sup>1</sup>H and <sup>13</sup>C spectra for 1a

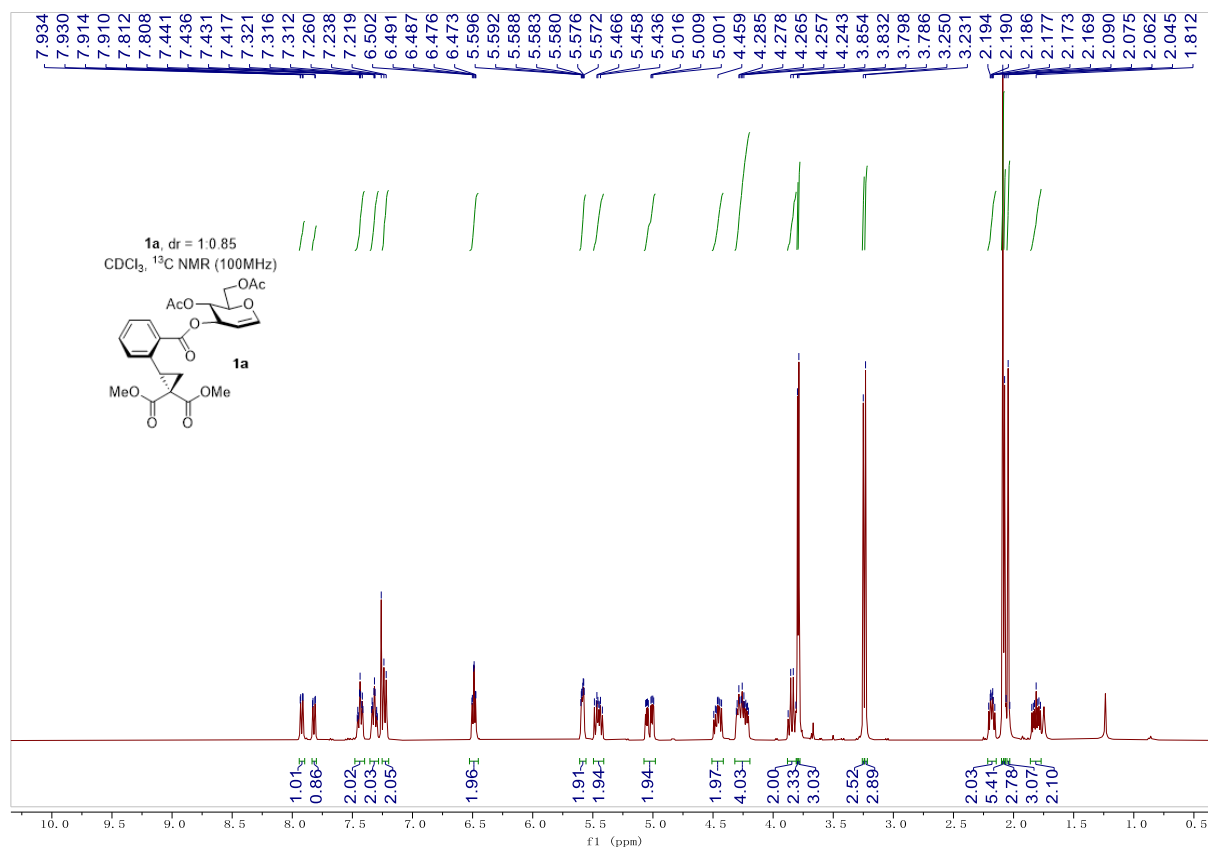

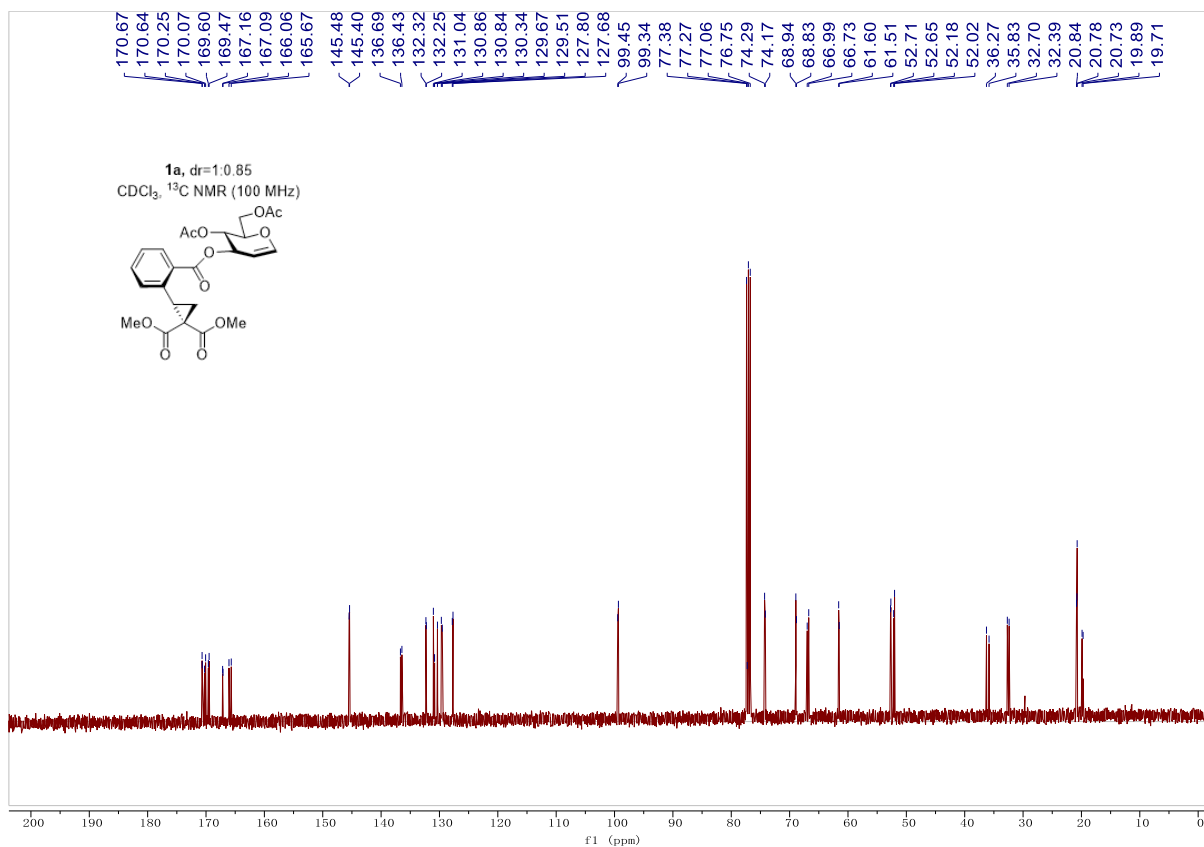

**<sup>1</sup>H and <sup>13</sup>C spectra for 1b**

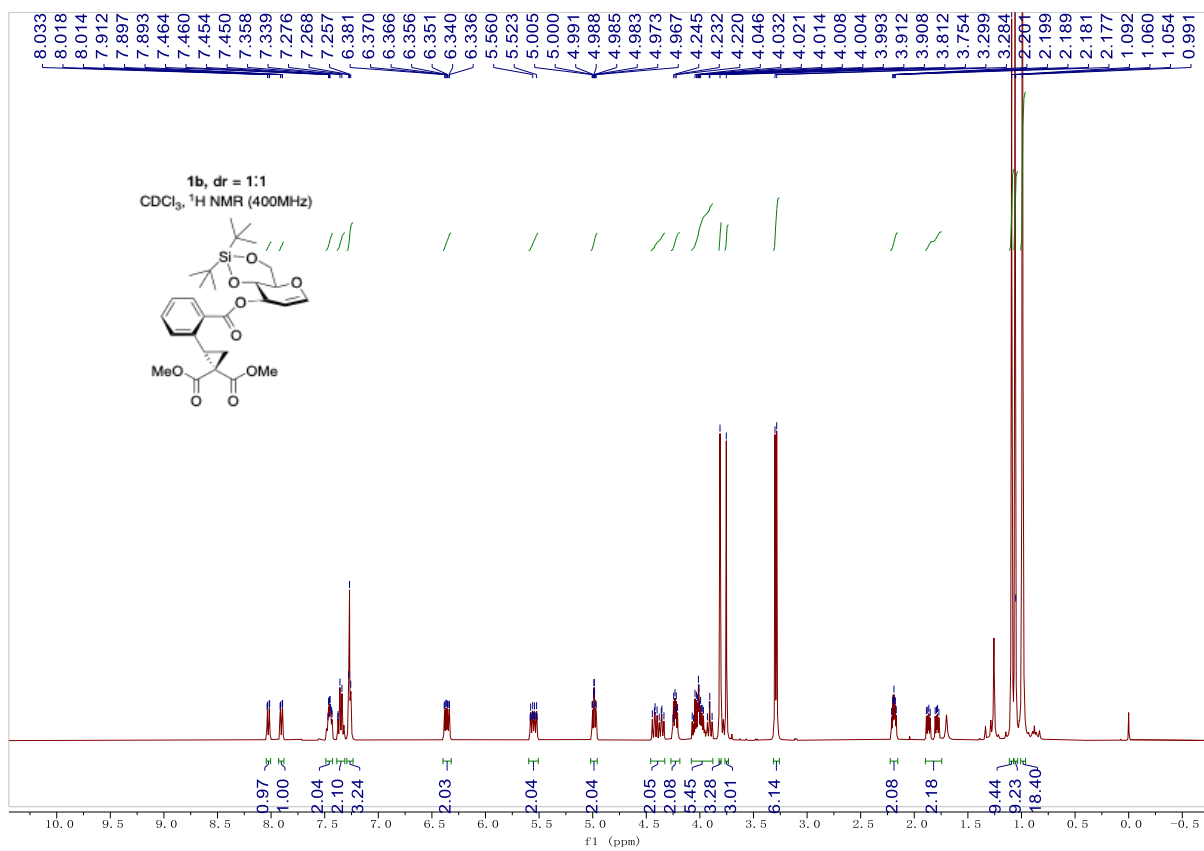

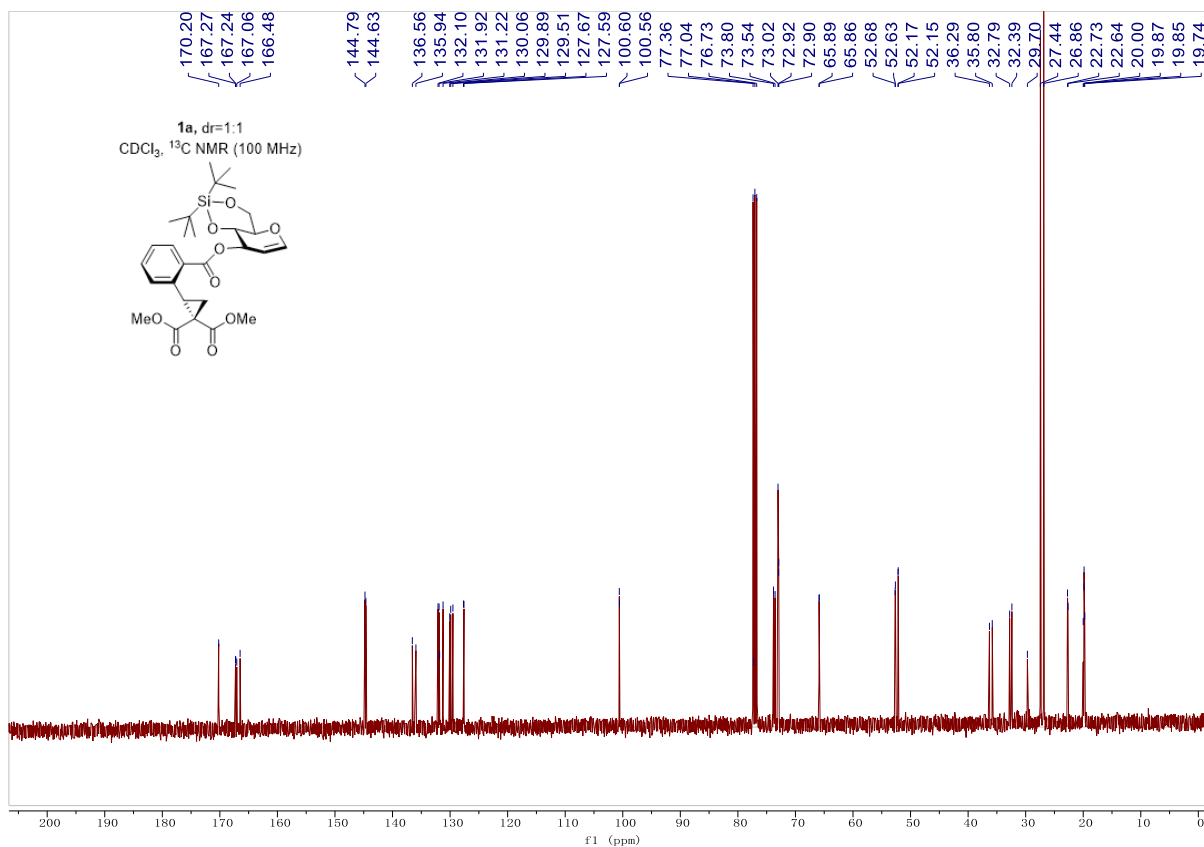

<sup>1</sup>H and <sup>13</sup>C spectra for **1c**

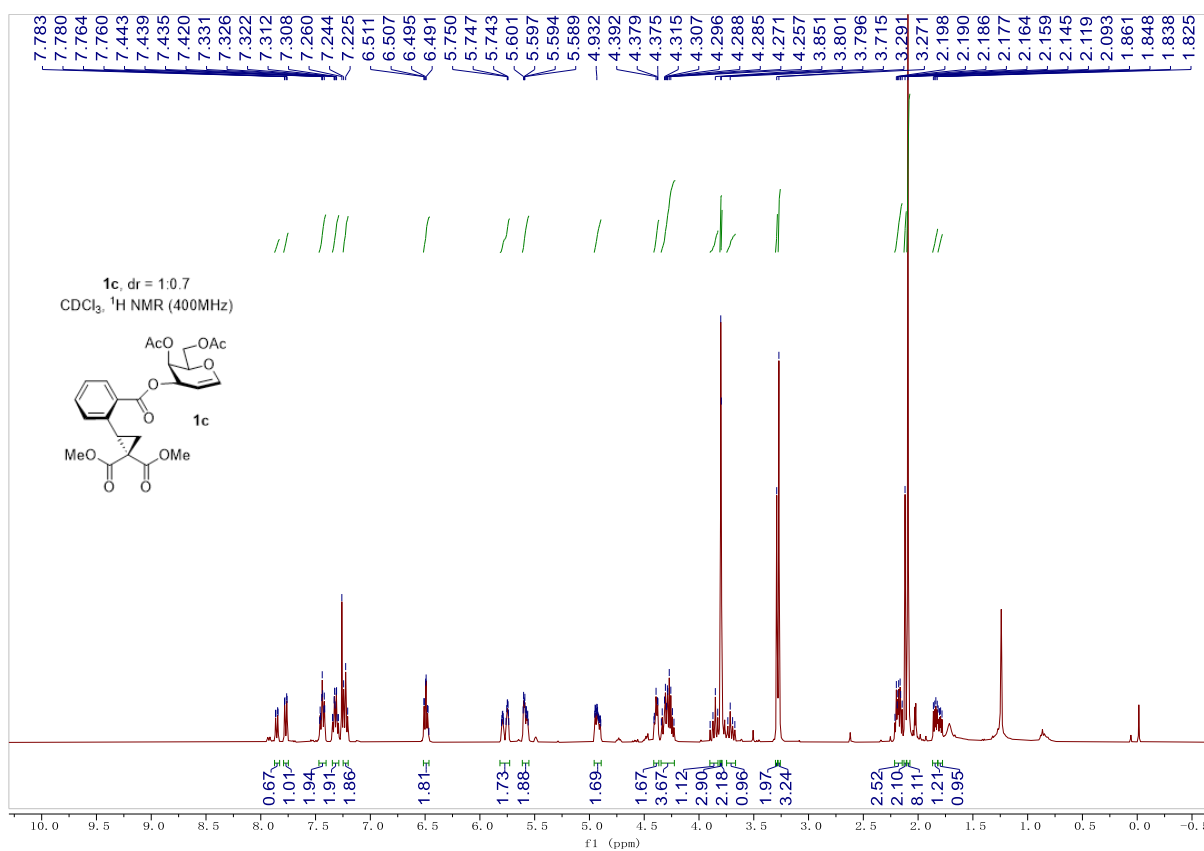

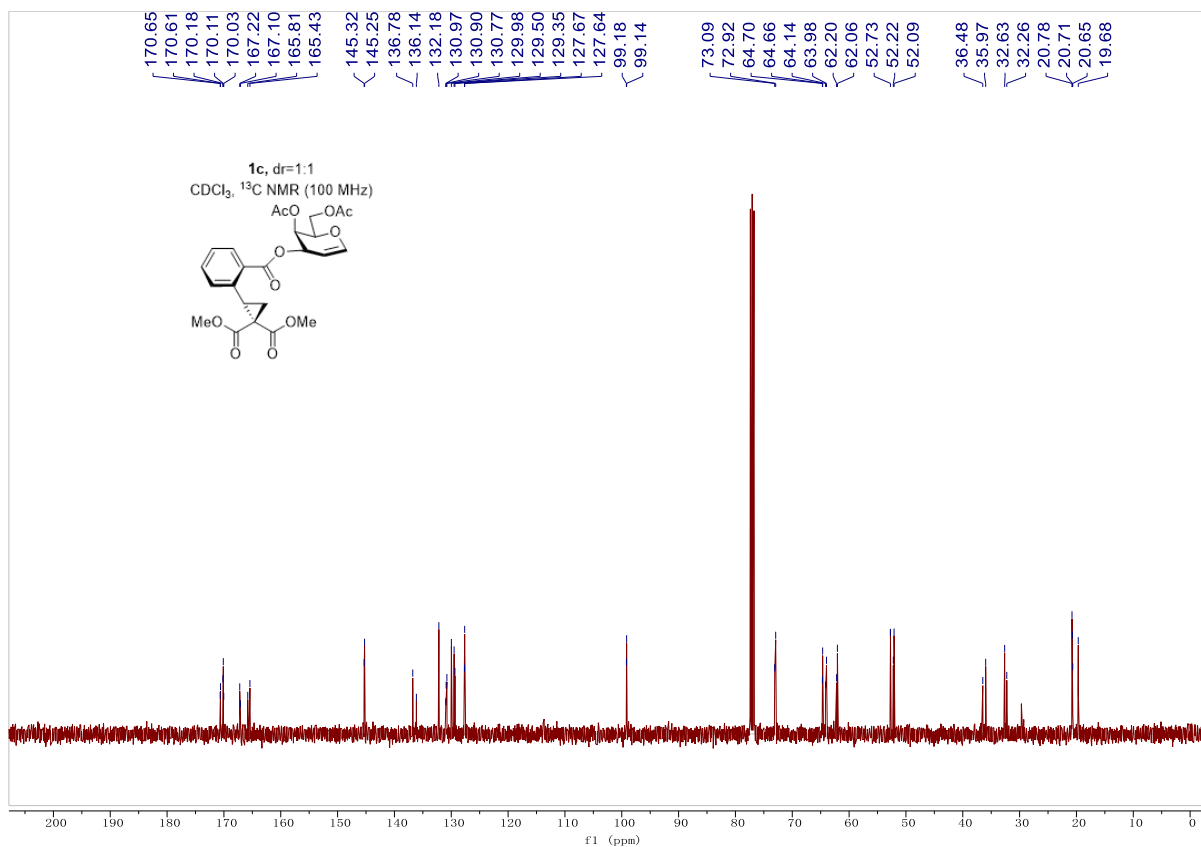

<sup>1</sup>H and <sup>13</sup>C spectra for **1d**

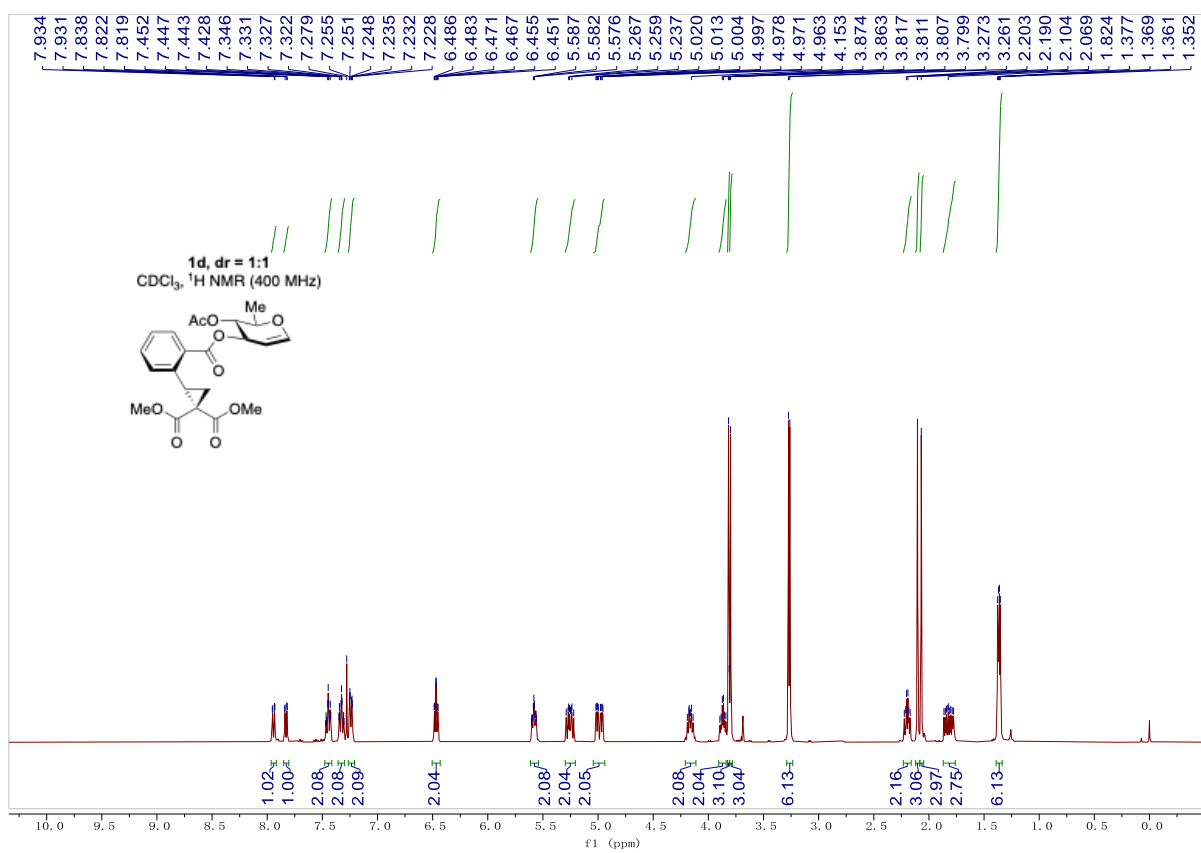



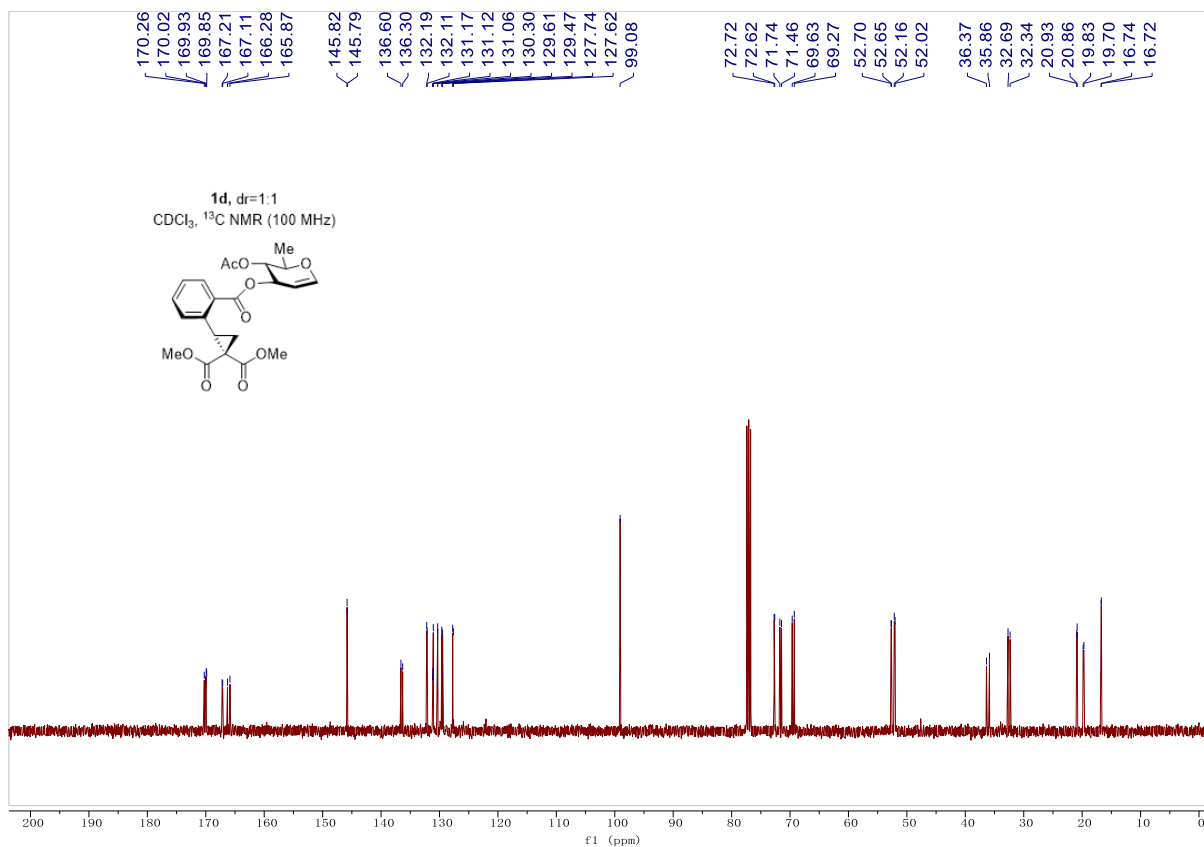

**<sup>1</sup>H and <sup>13</sup>C spectra for 2u**

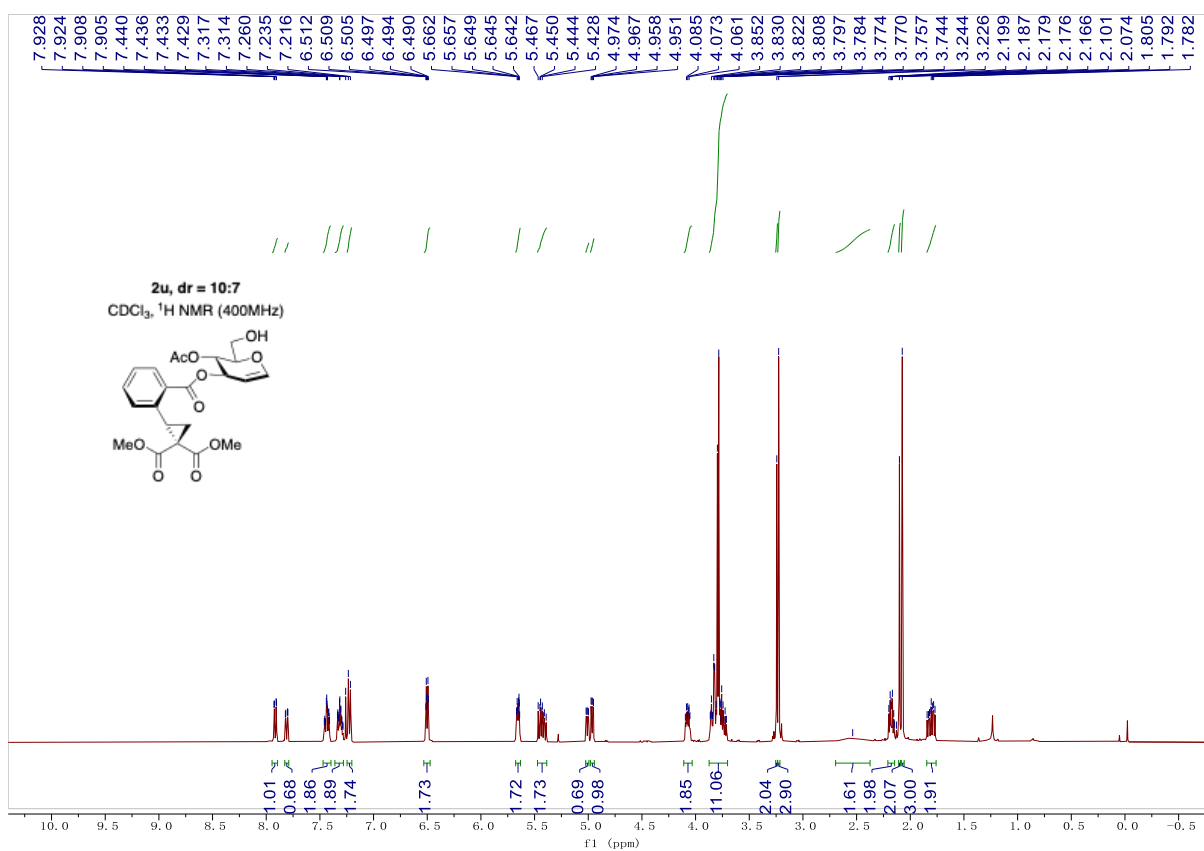

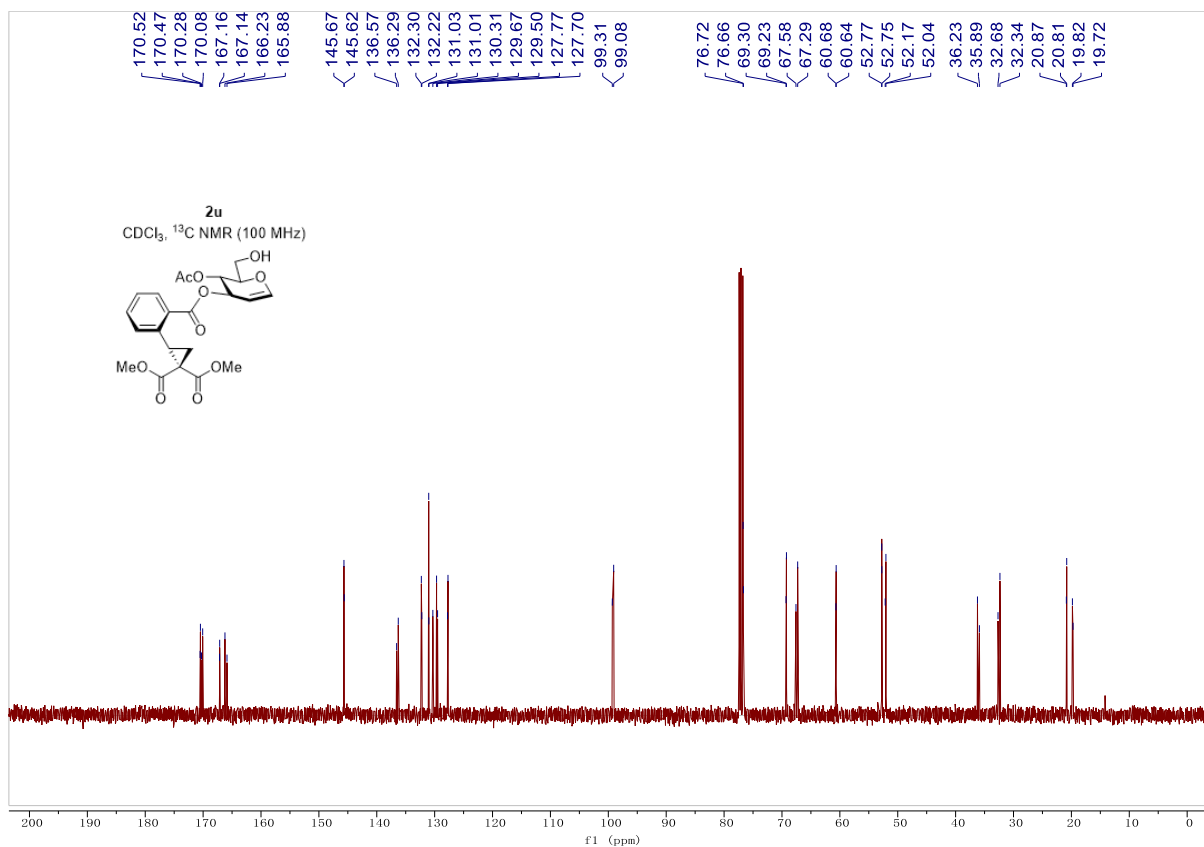

<sup>1</sup>H spectrum for **4a**

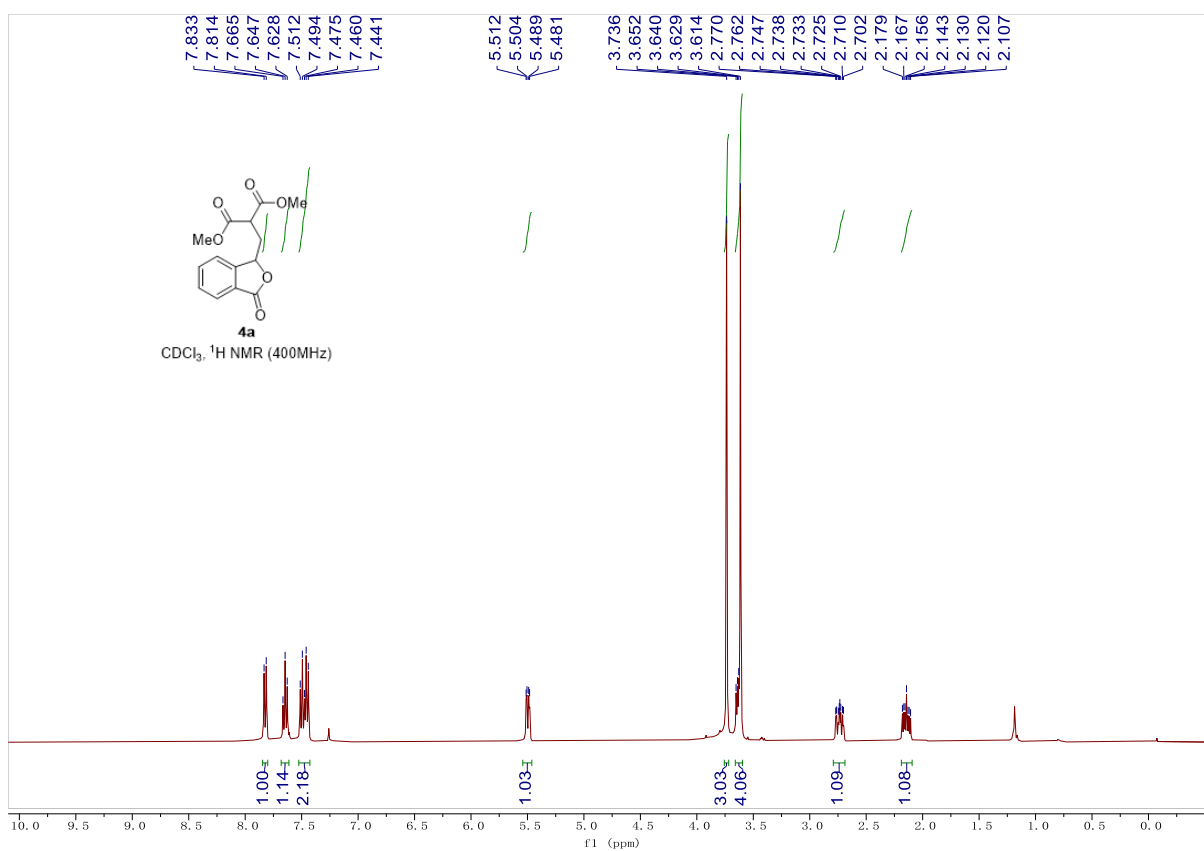

### <sup>1</sup>H spectrum for 3a

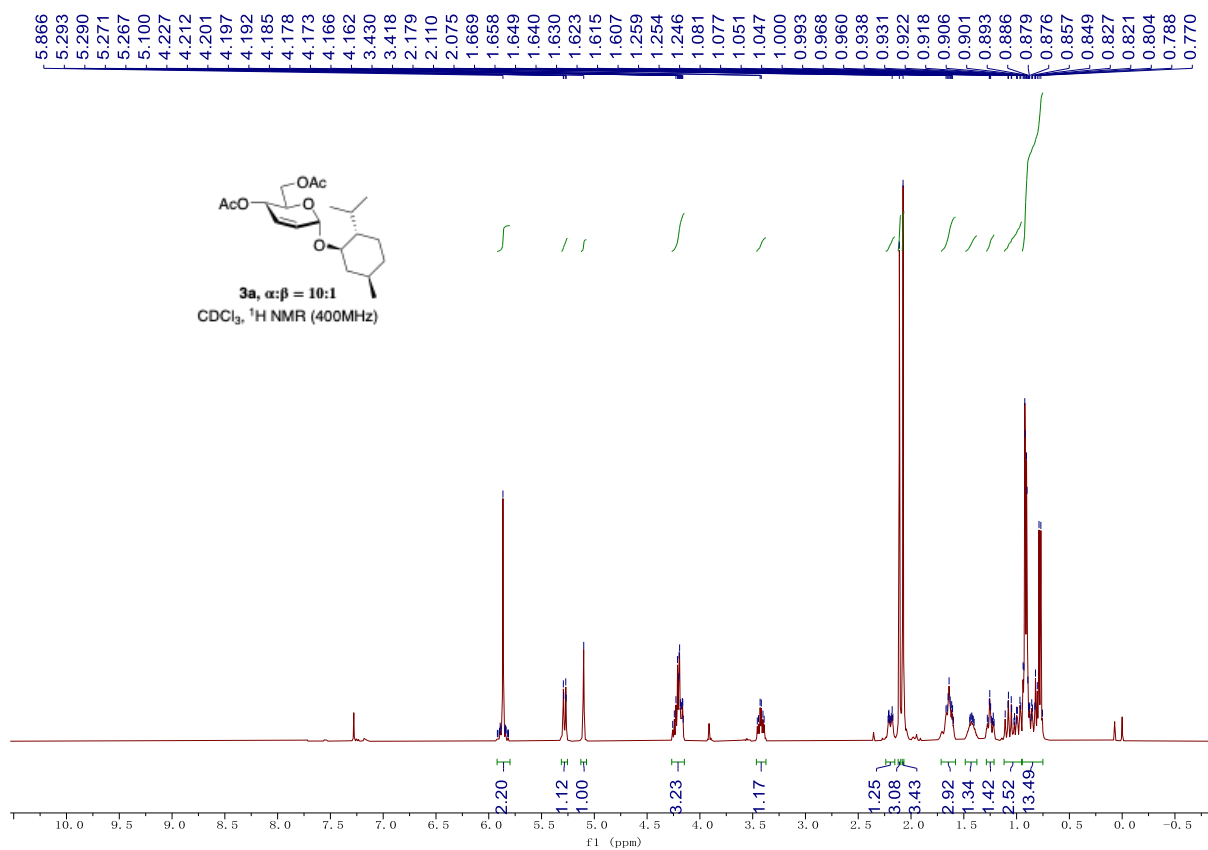

### <sup>1</sup>H spectrum for 3b

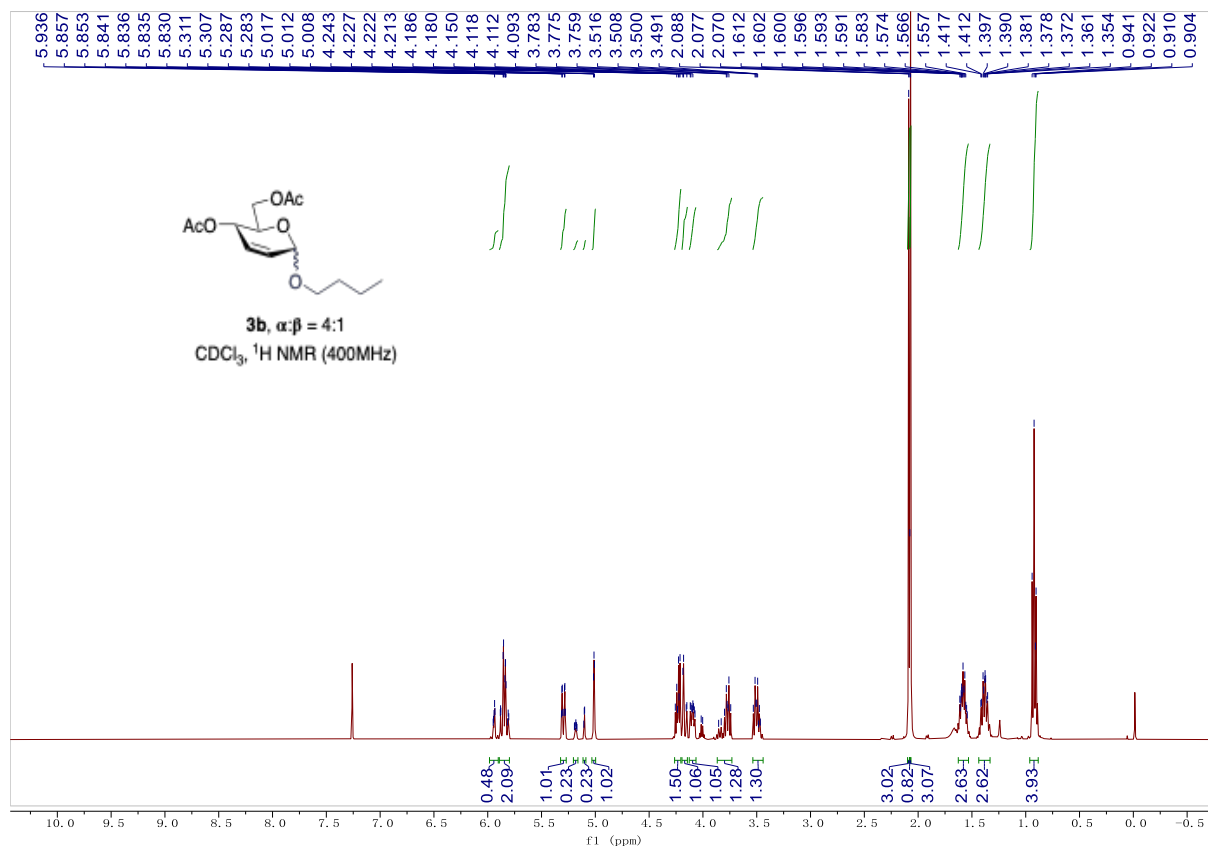

<sup>1</sup>H spectrum for **3c**

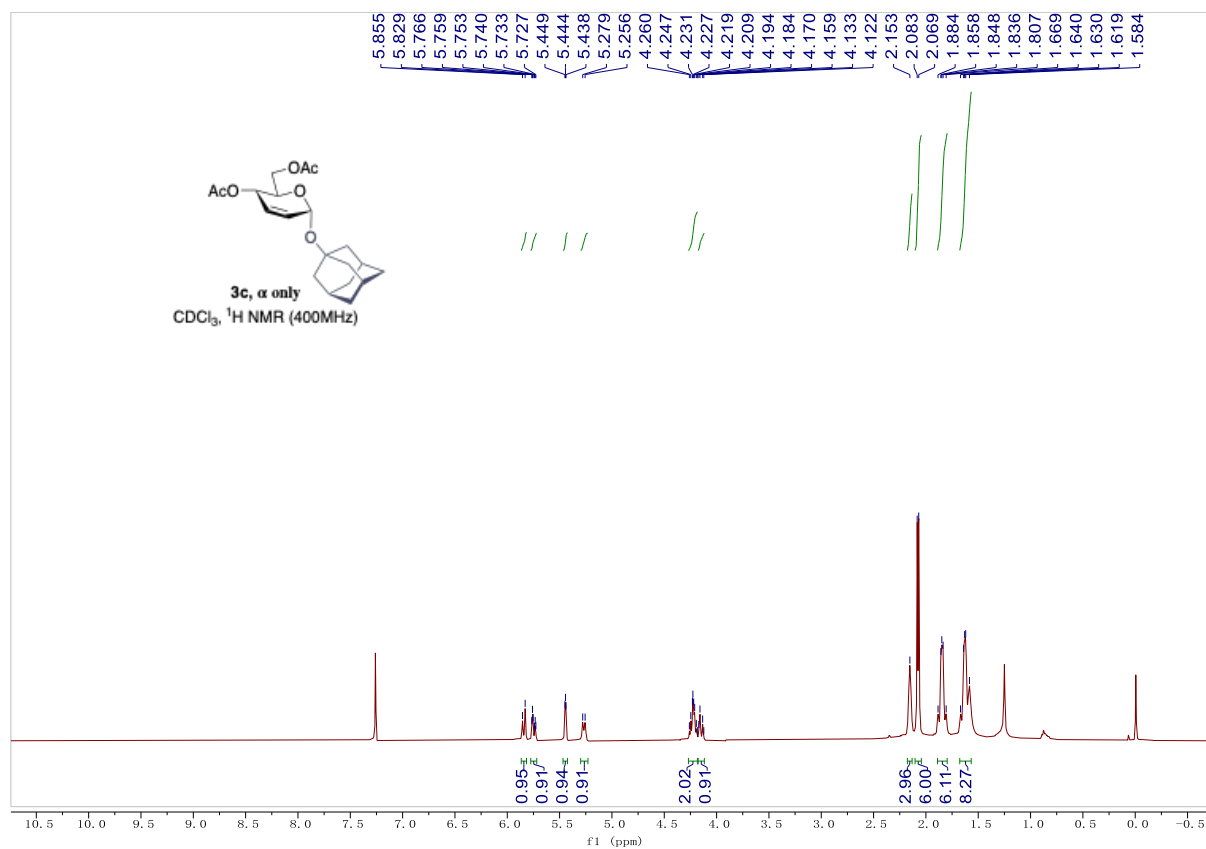

<sup>1</sup>H spectrum for **3d**

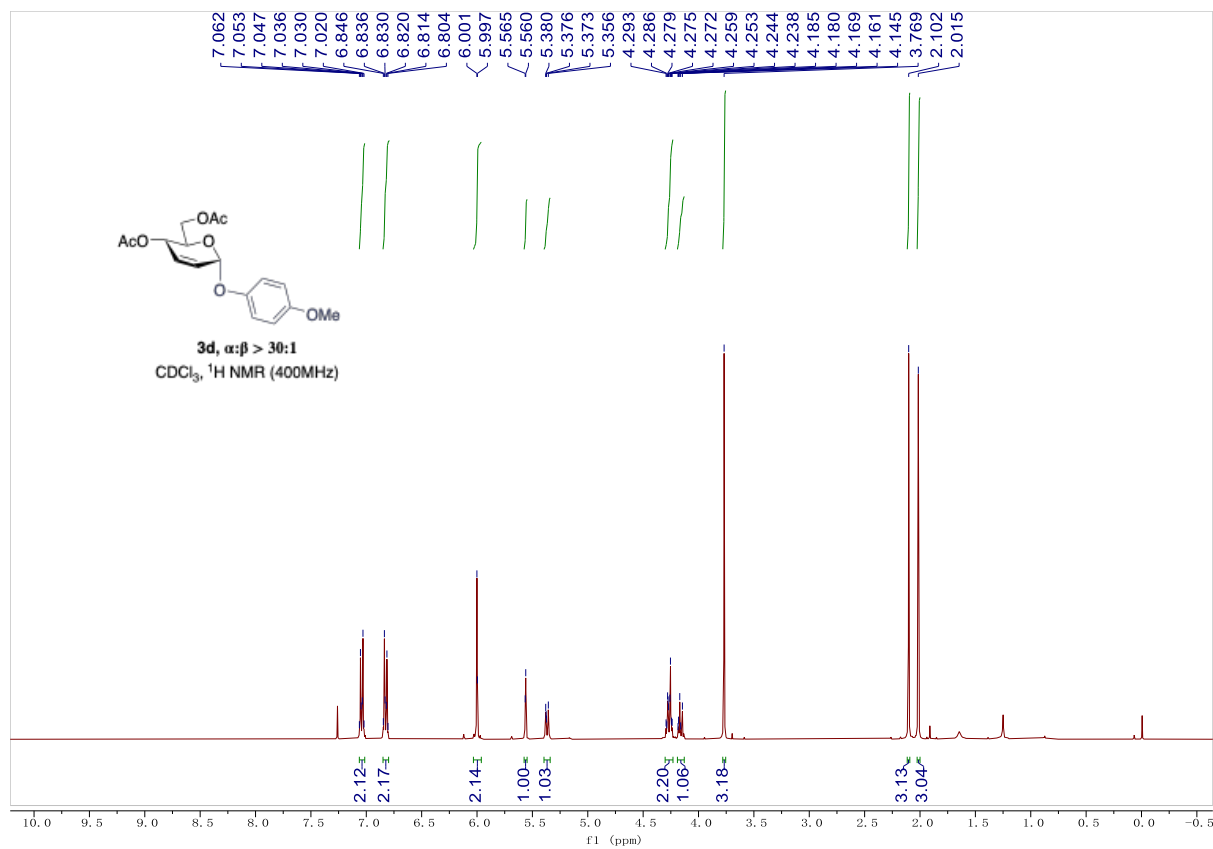

$^1\text{H}$  and  $^{13}\text{C}$  spectra for **3e**

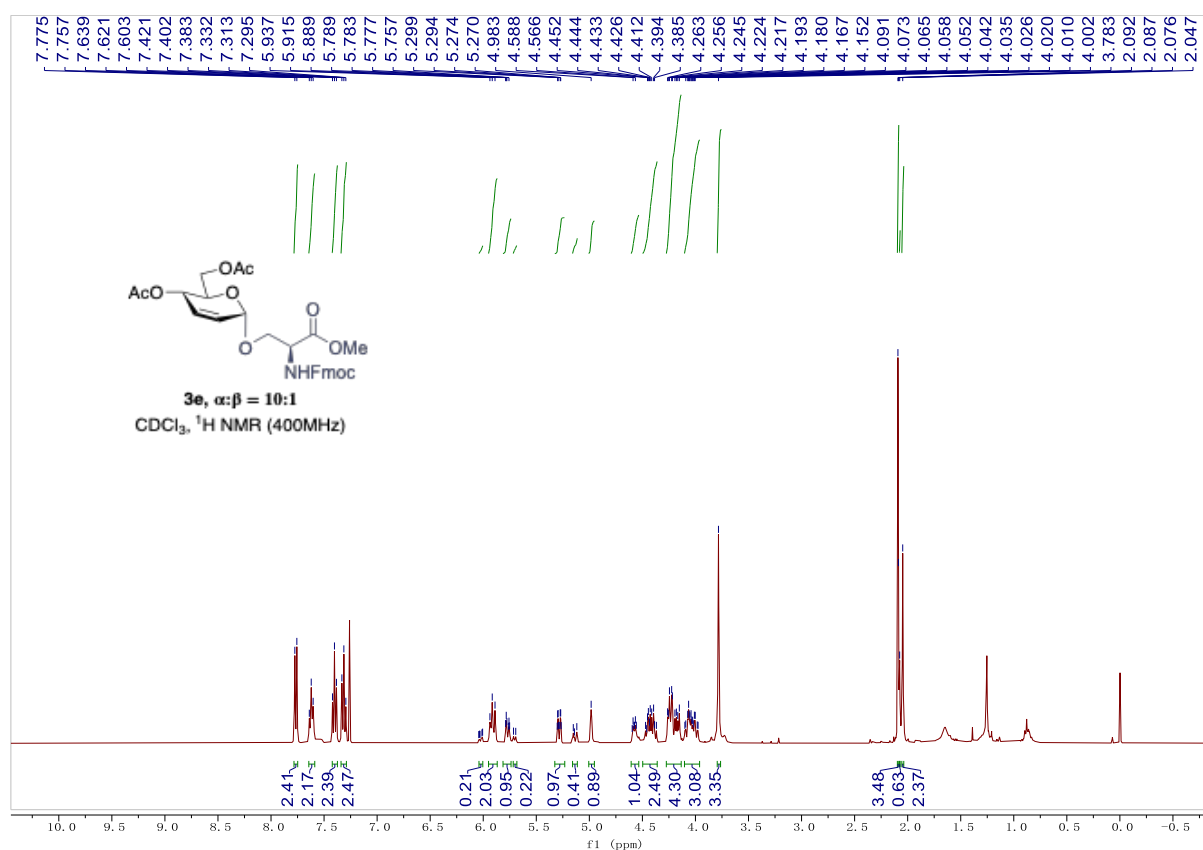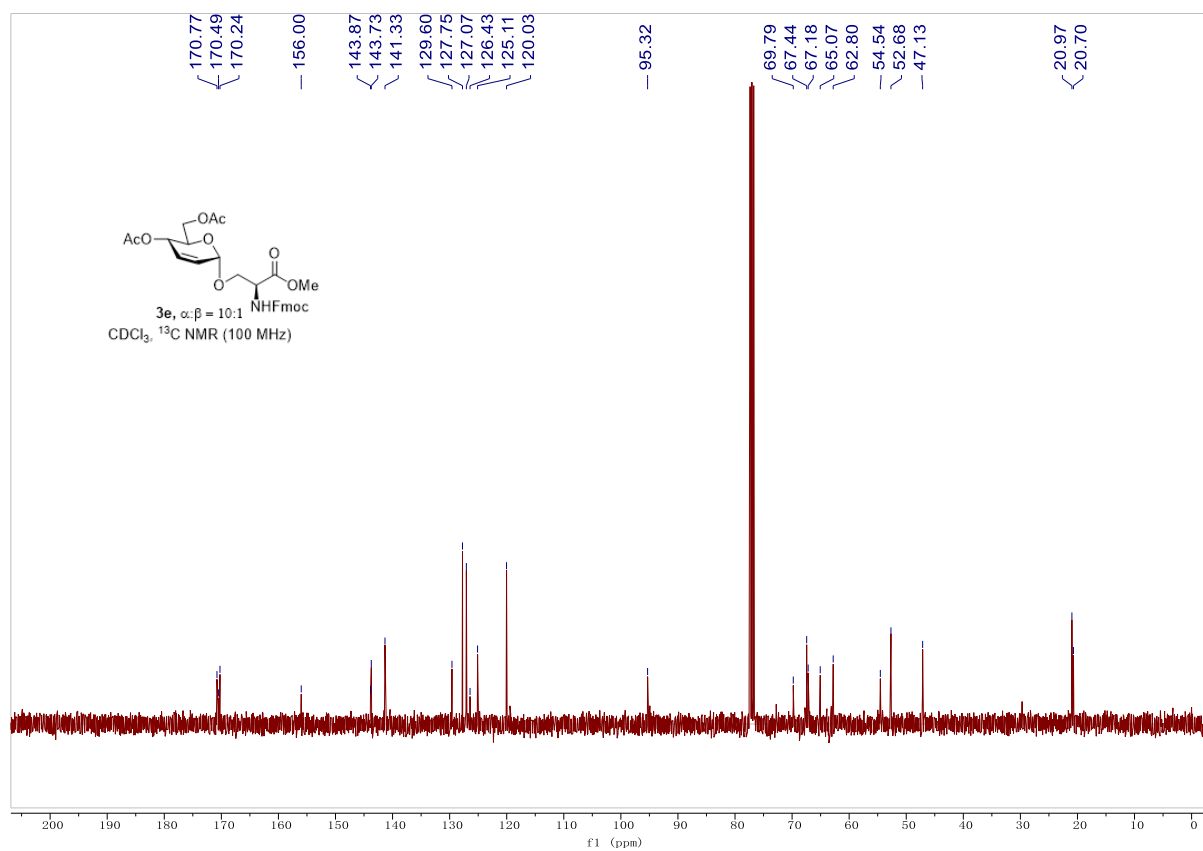

<sup>1</sup>H spectrum for **3f**

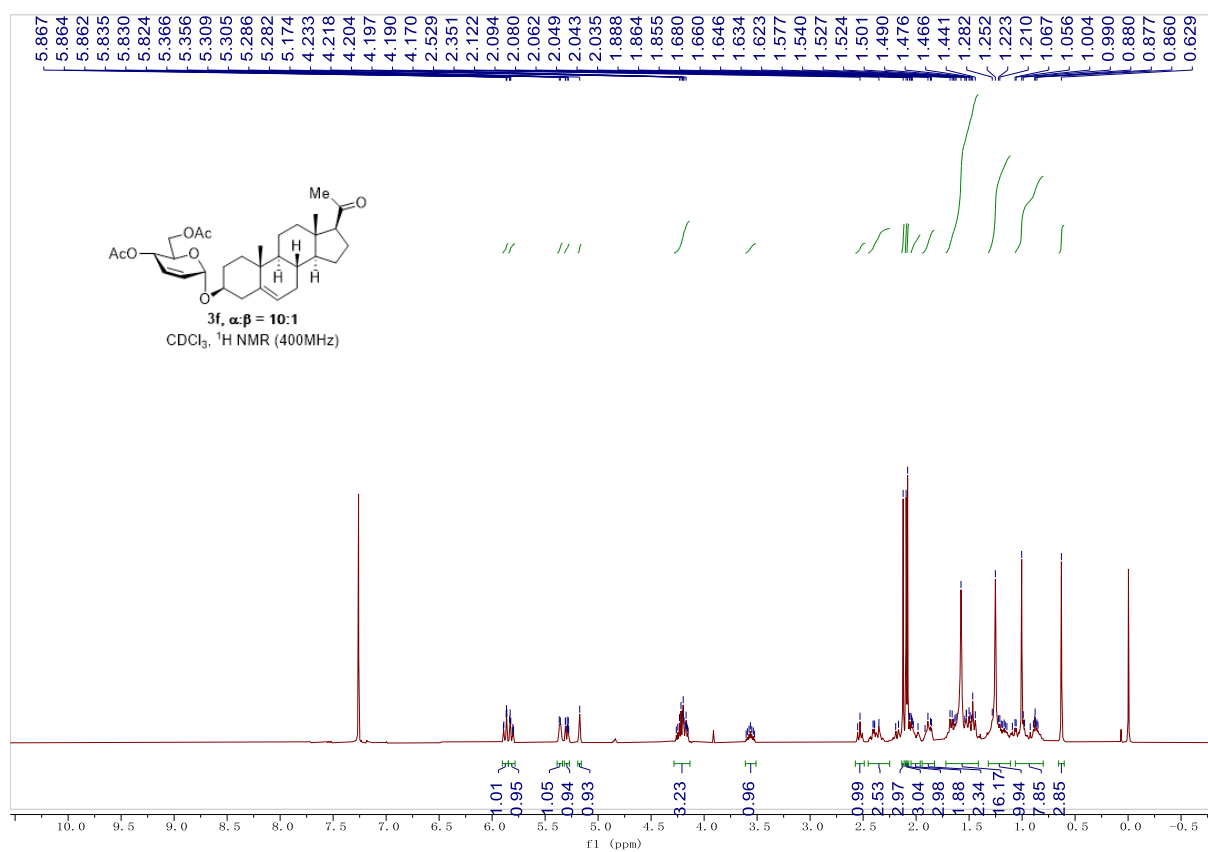

<sup>1</sup>H spectrum for **3g**

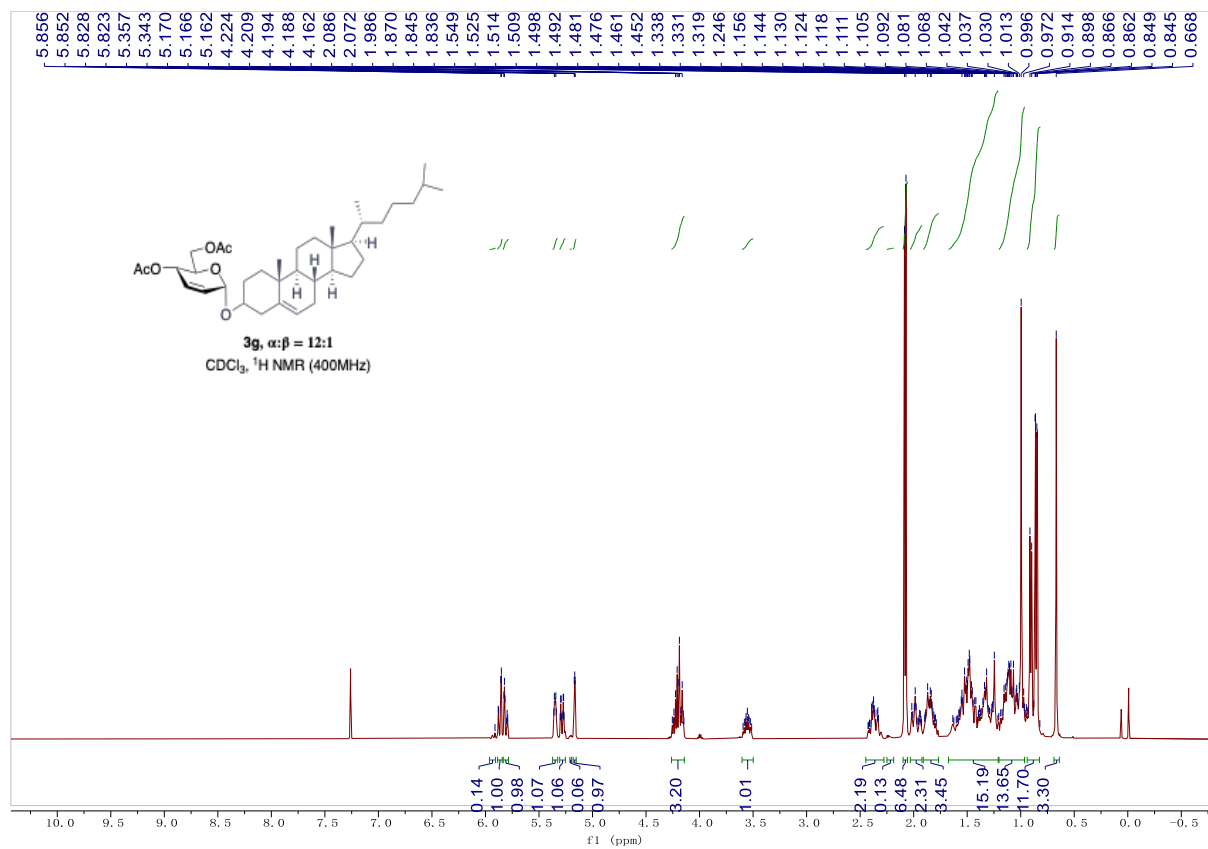

<sup>1</sup>H and <sup>13</sup>C spectra for **3h**

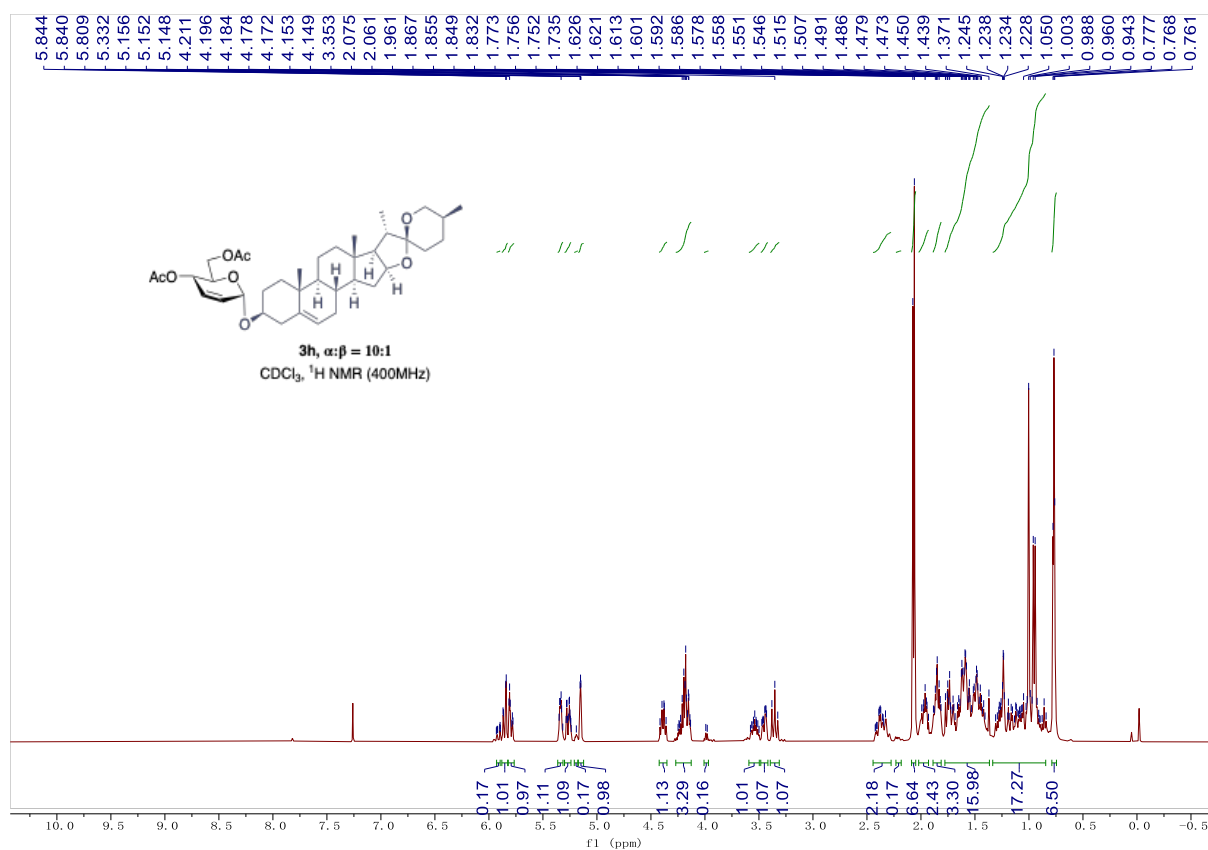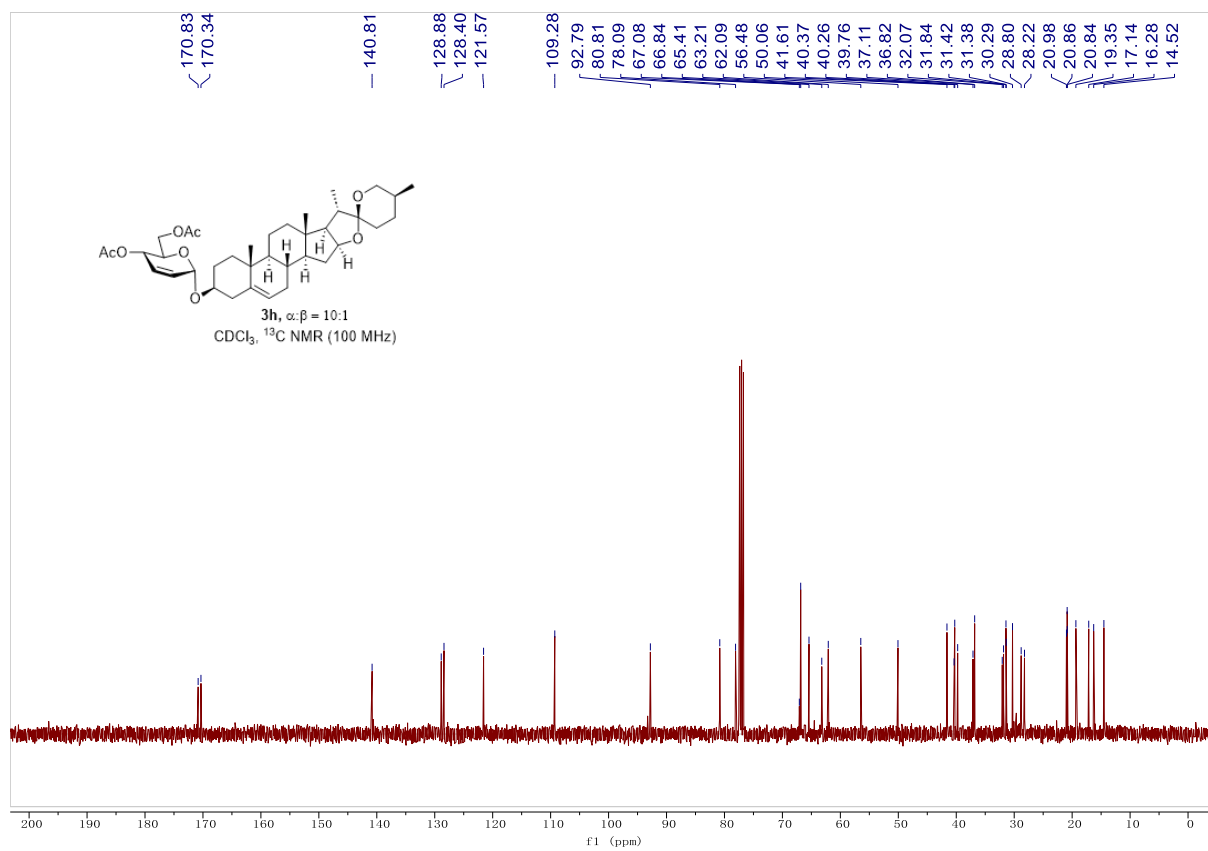

$^1\text{H}$  and  $^{13}\text{C}$  spectra for **3i**

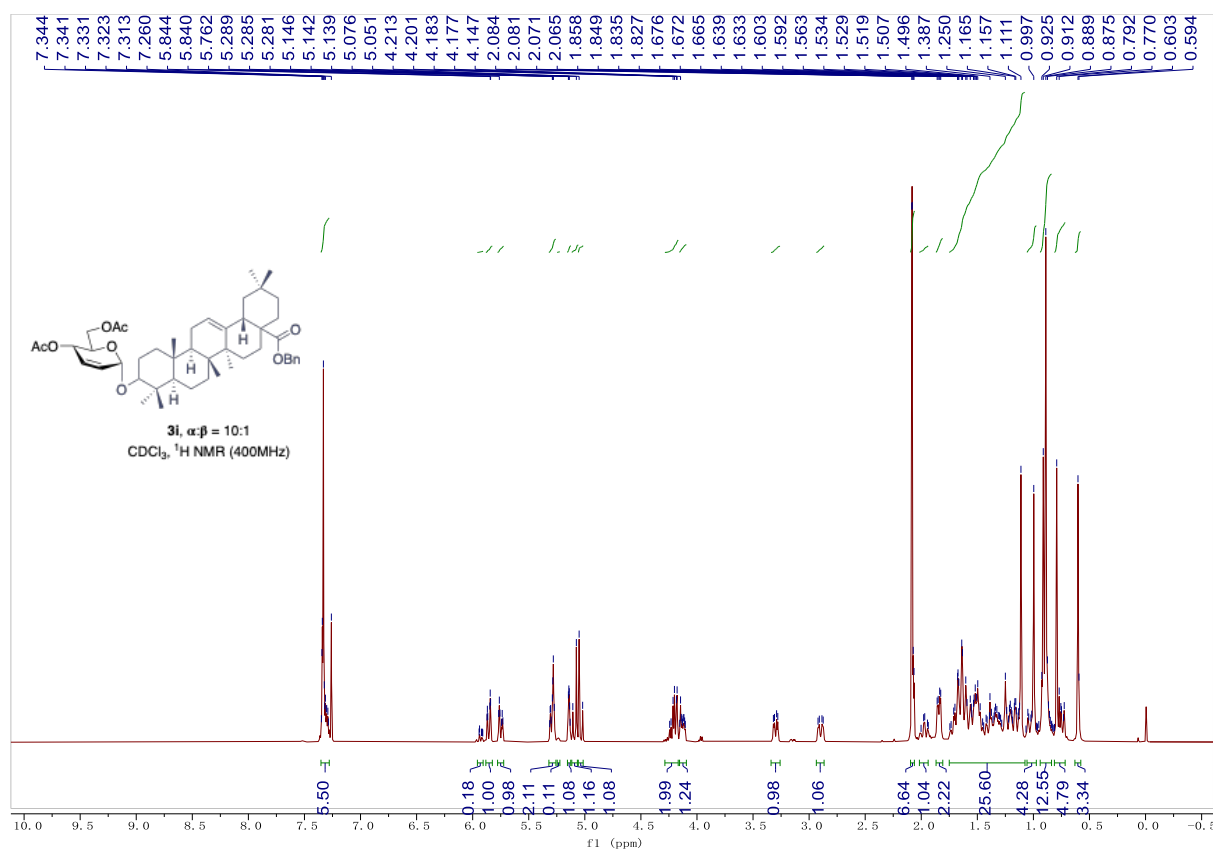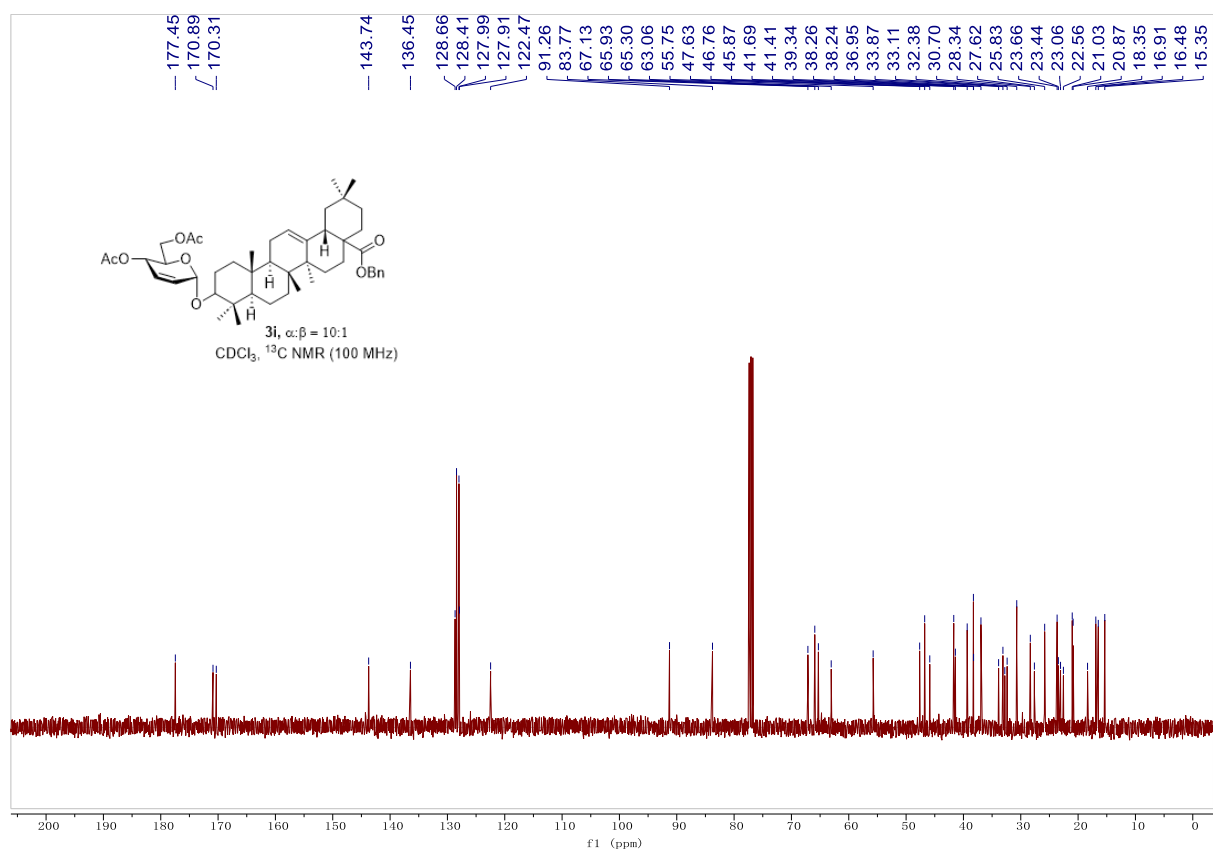



<sup>1</sup>H and <sup>13</sup>C spectra for **3j**

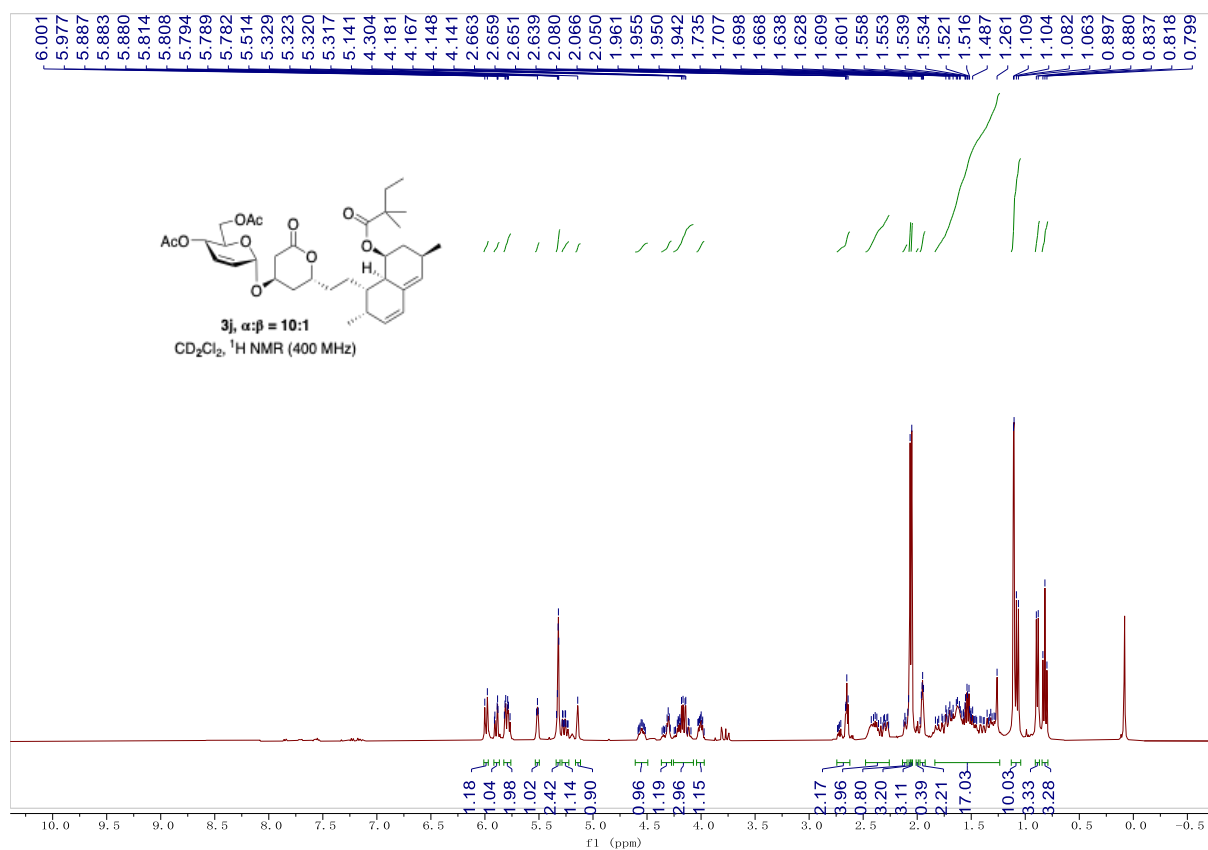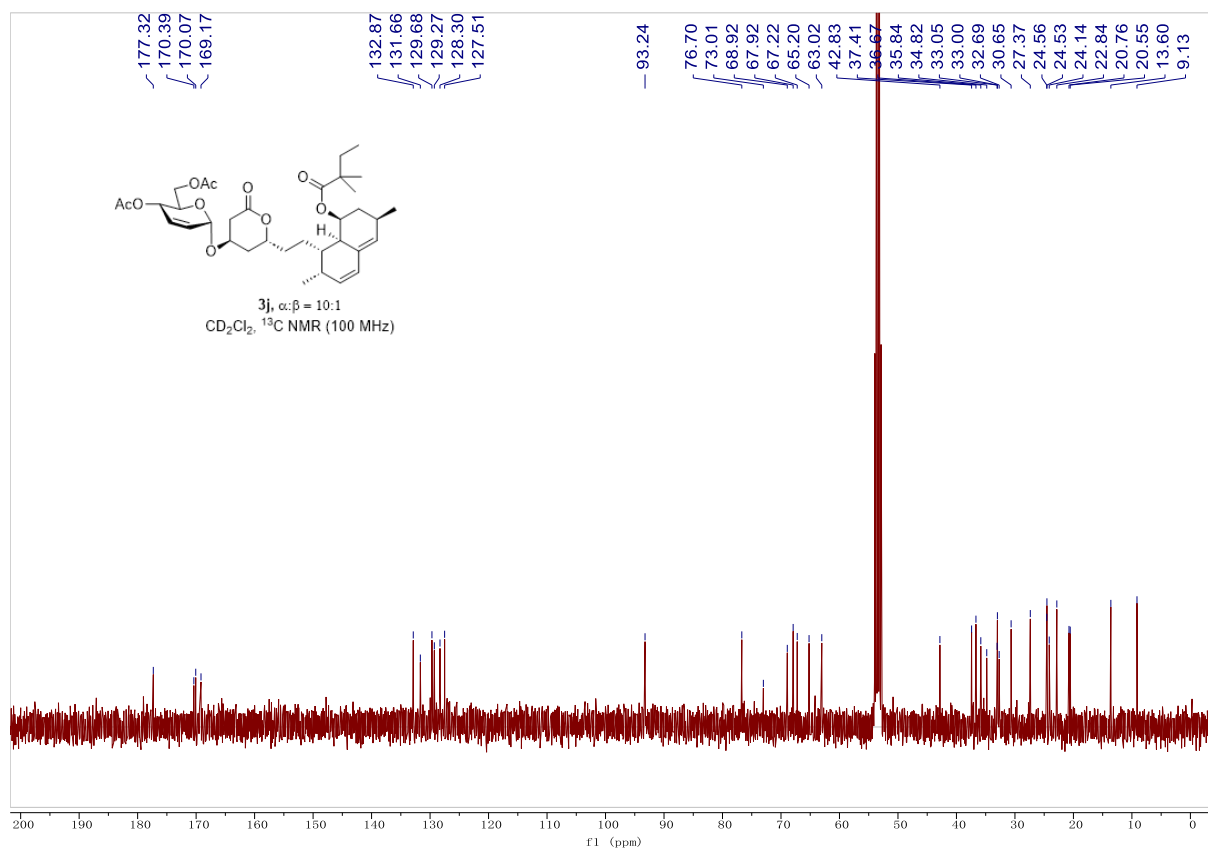

<sup>1</sup>H and <sup>13</sup>C spectra for **3k**

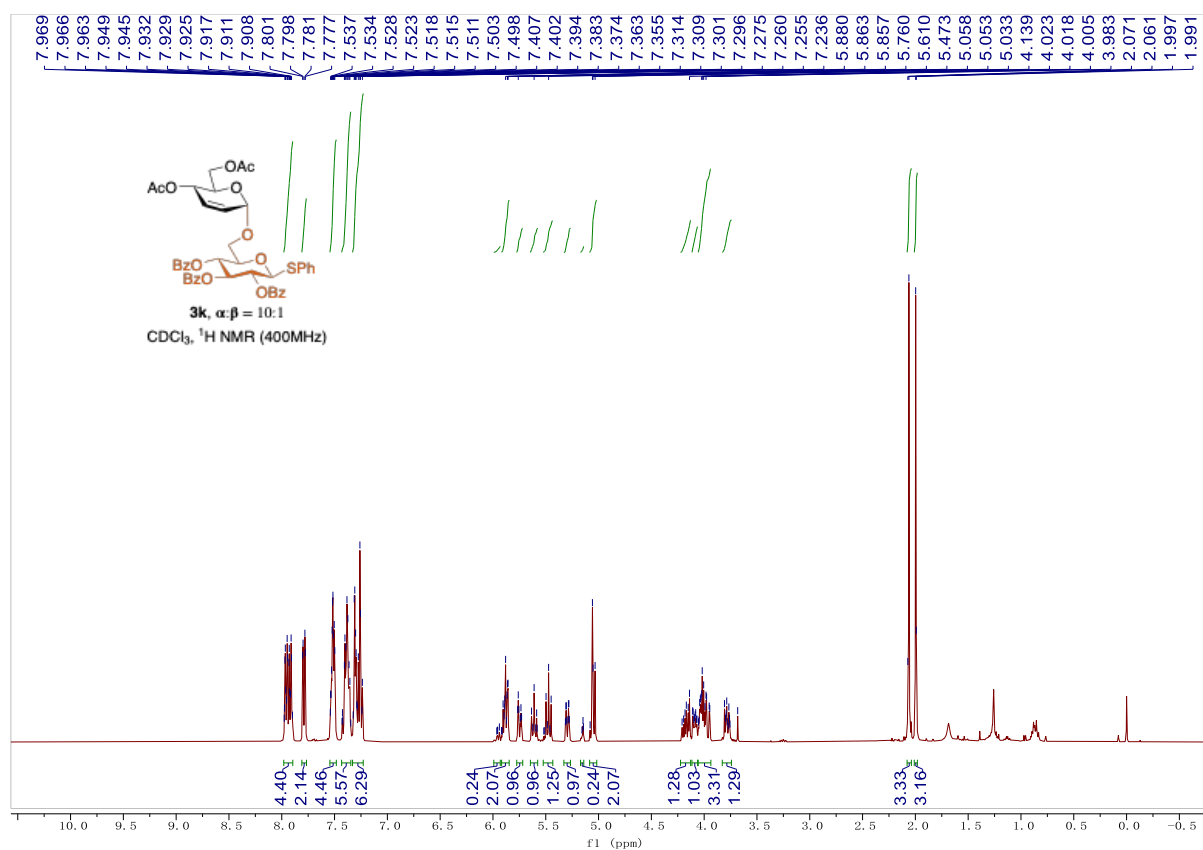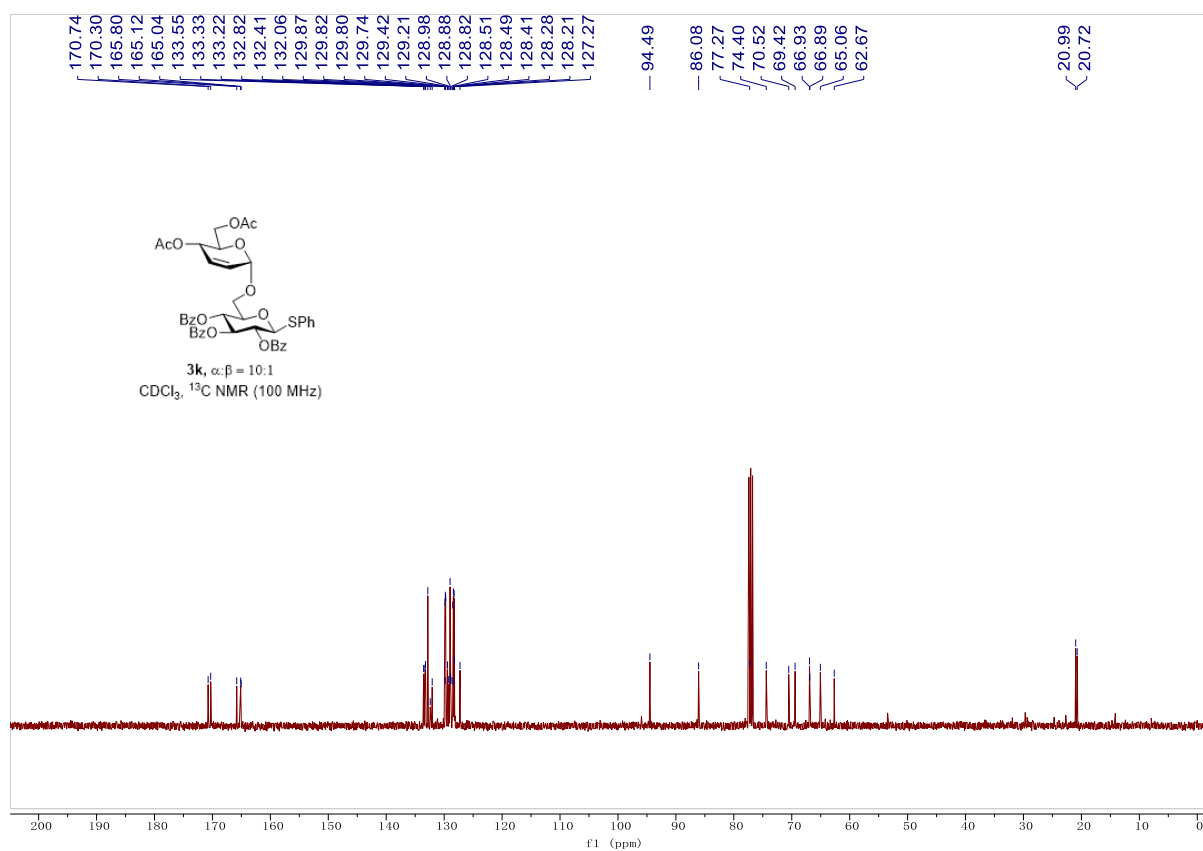

<sup>1</sup>H and <sup>13</sup>C spectra for **31**

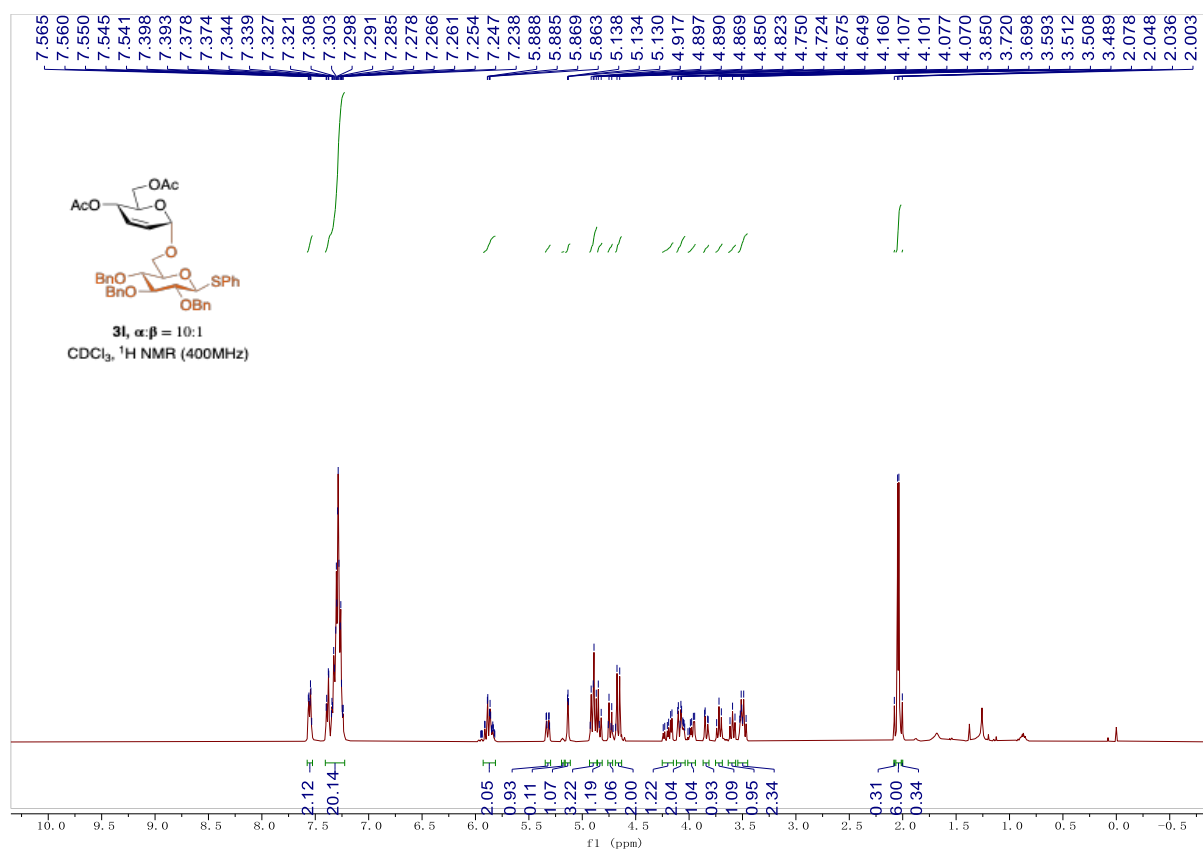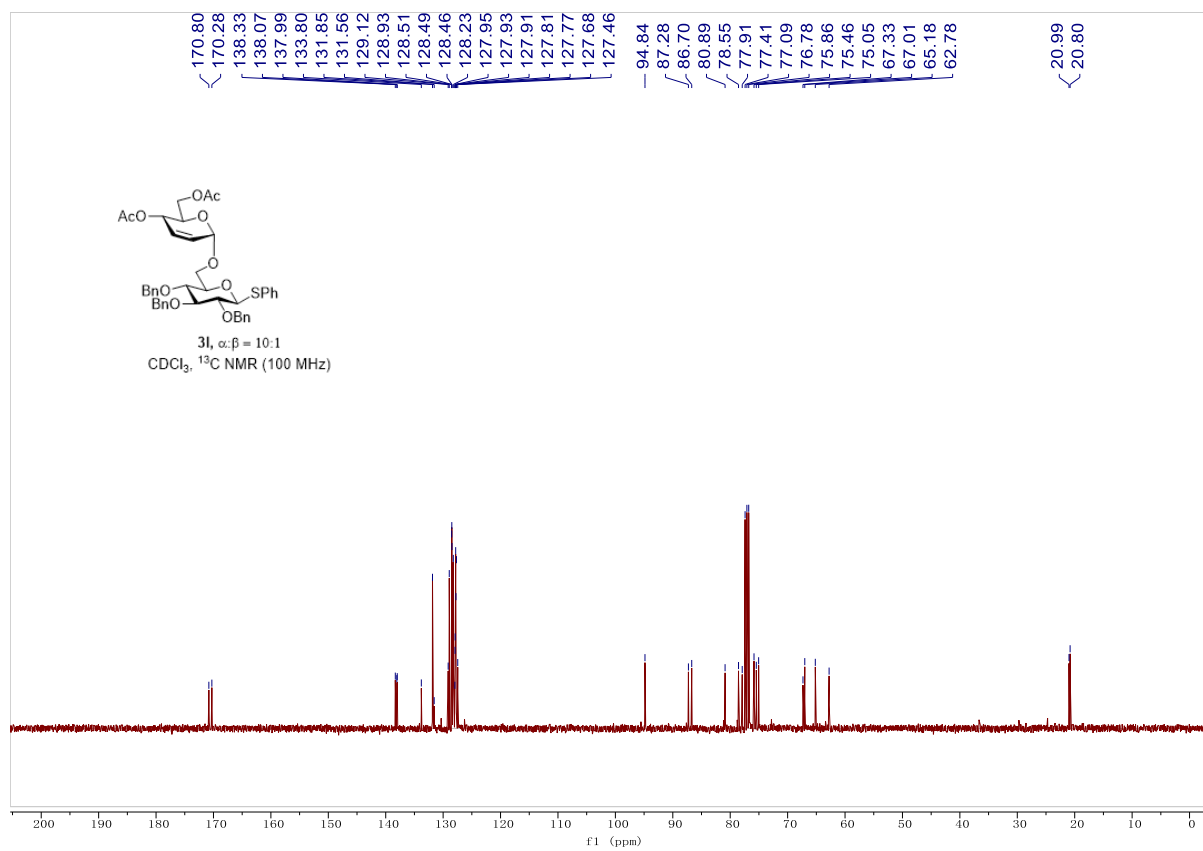

<sup>1</sup>H spectrum for **3m**

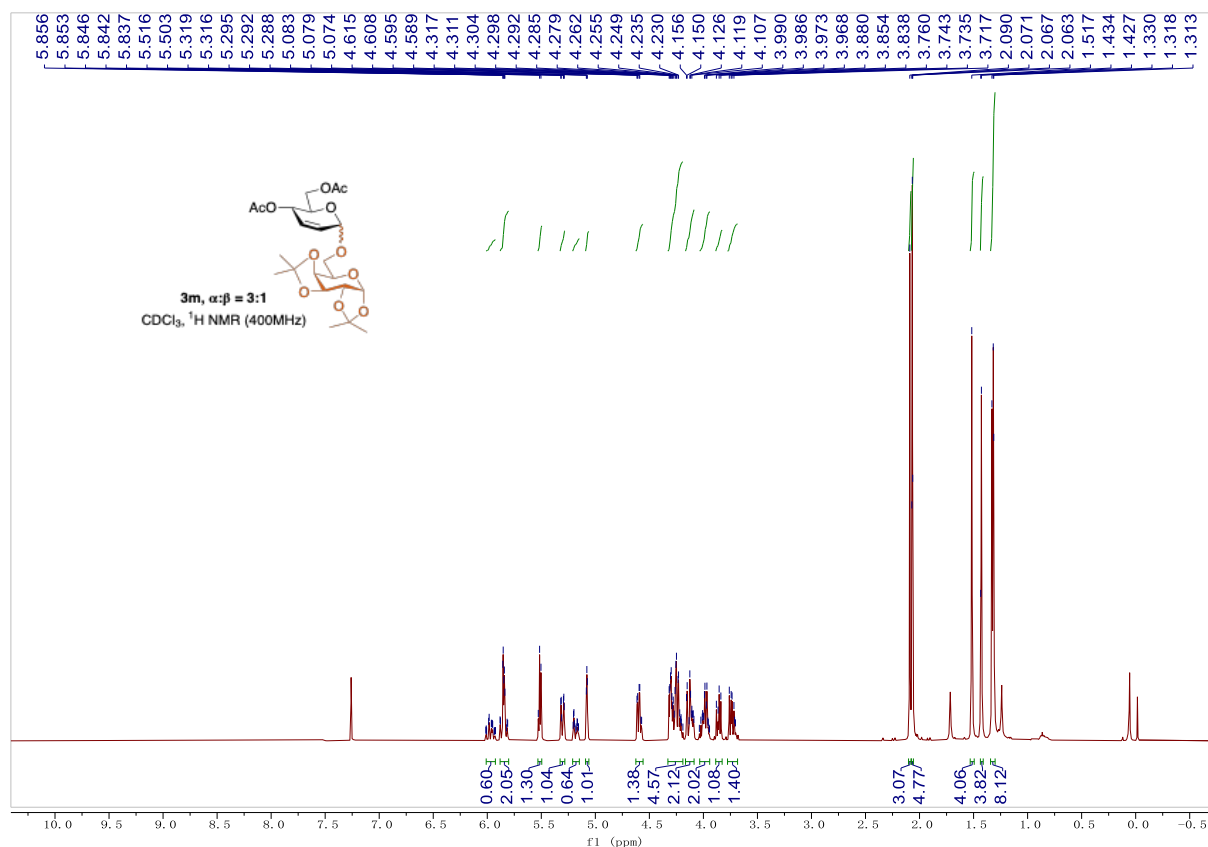

<sup>1</sup>H and <sup>13</sup>C spectra for **3n**

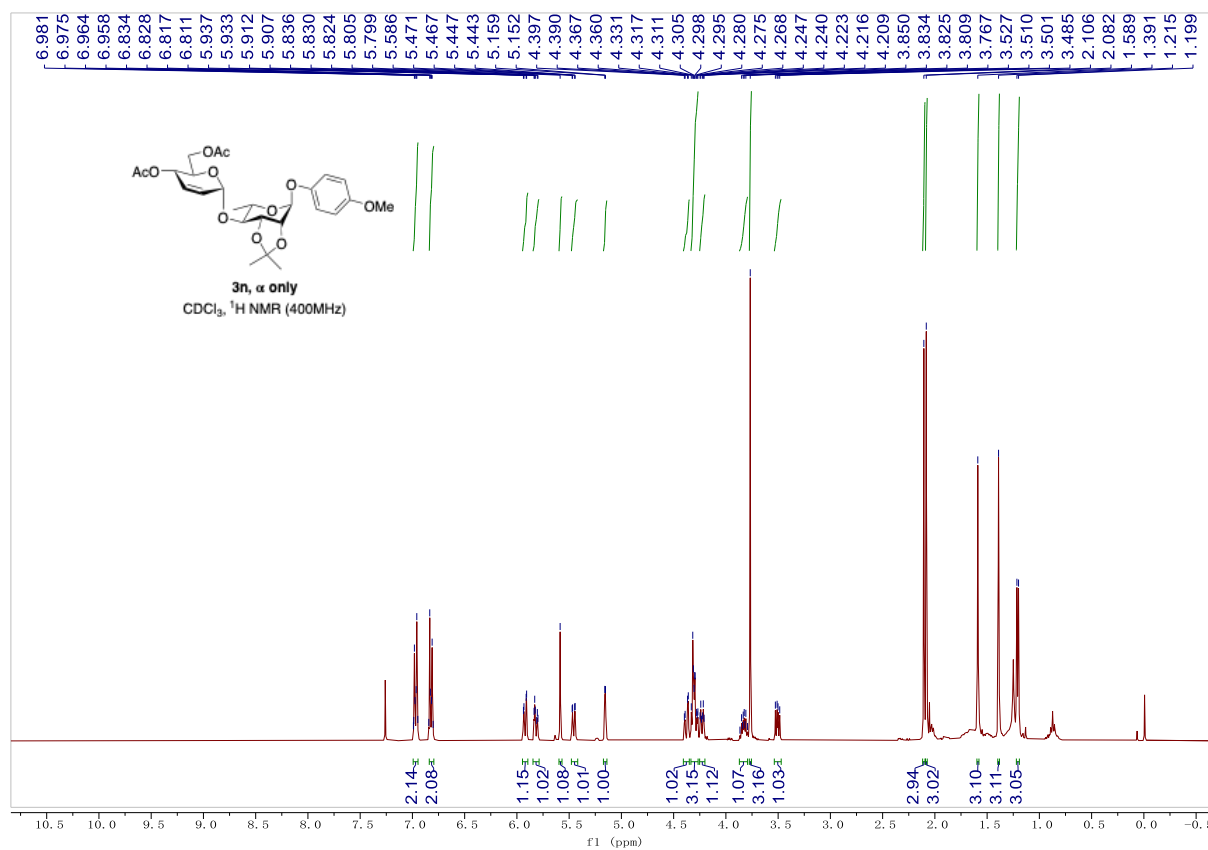

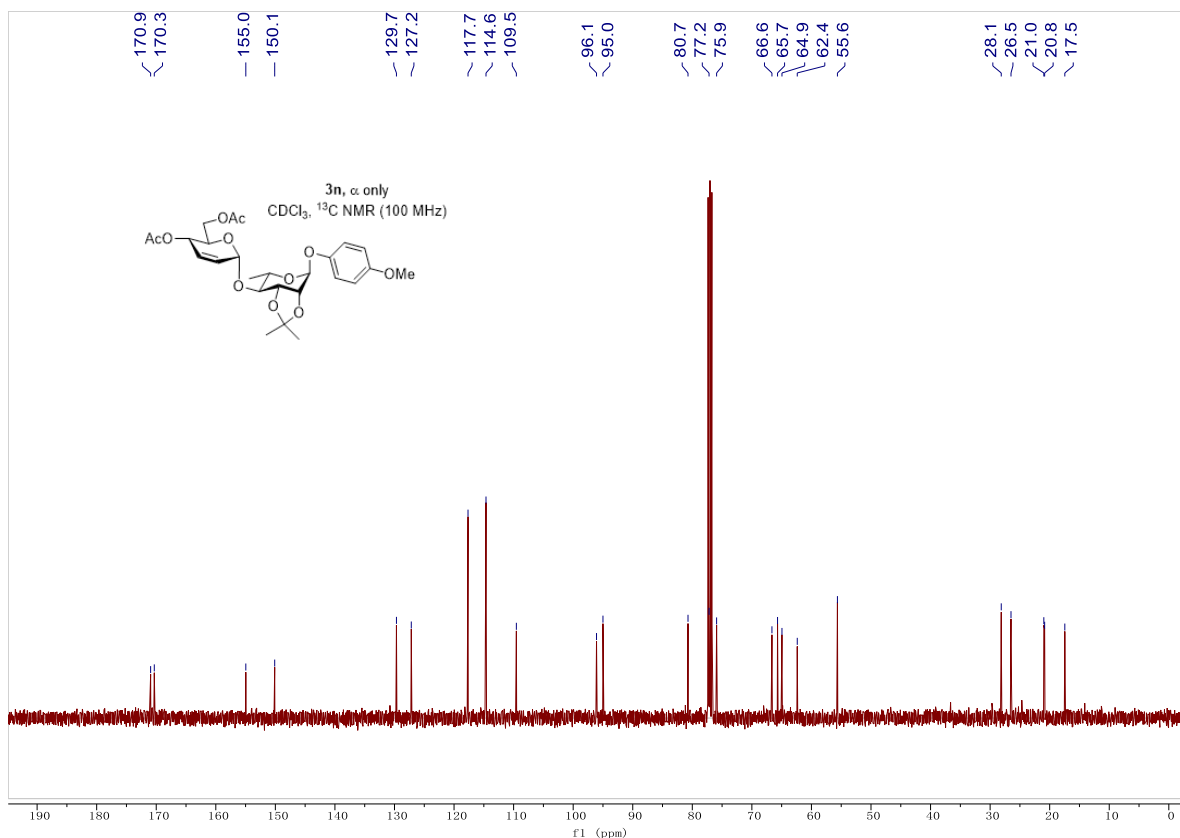

**<sup>1</sup>H and <sup>13</sup>C spectra for 3o**

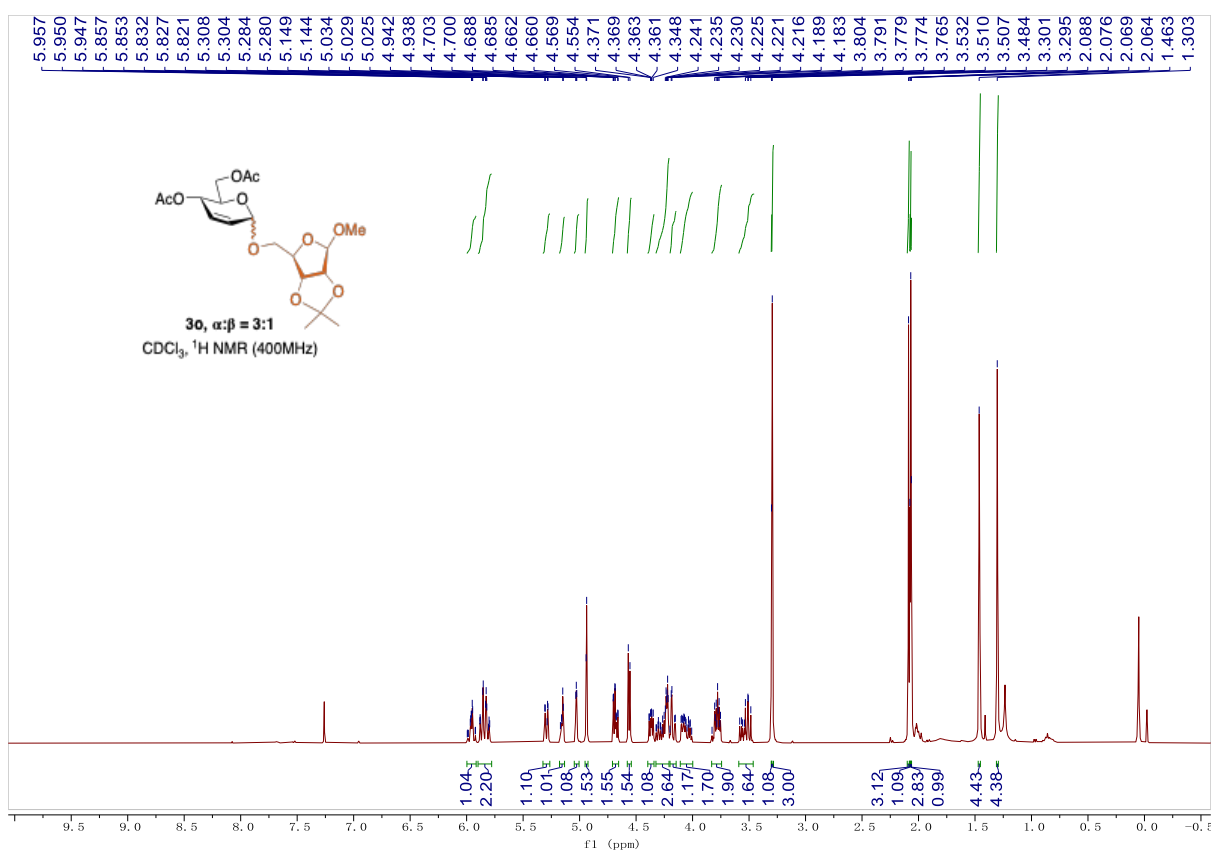

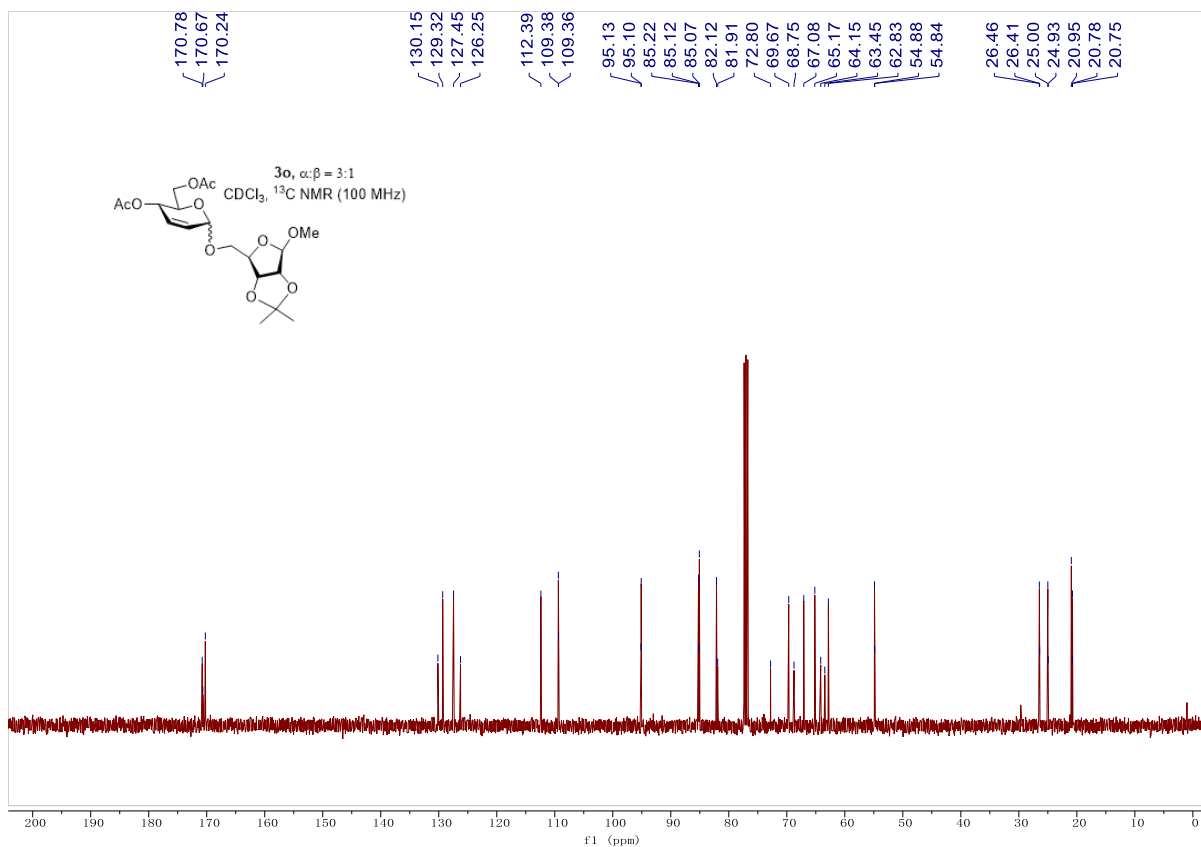

$^1\text{H}$  and  $^{13}\text{C}$  spectra for **3p**

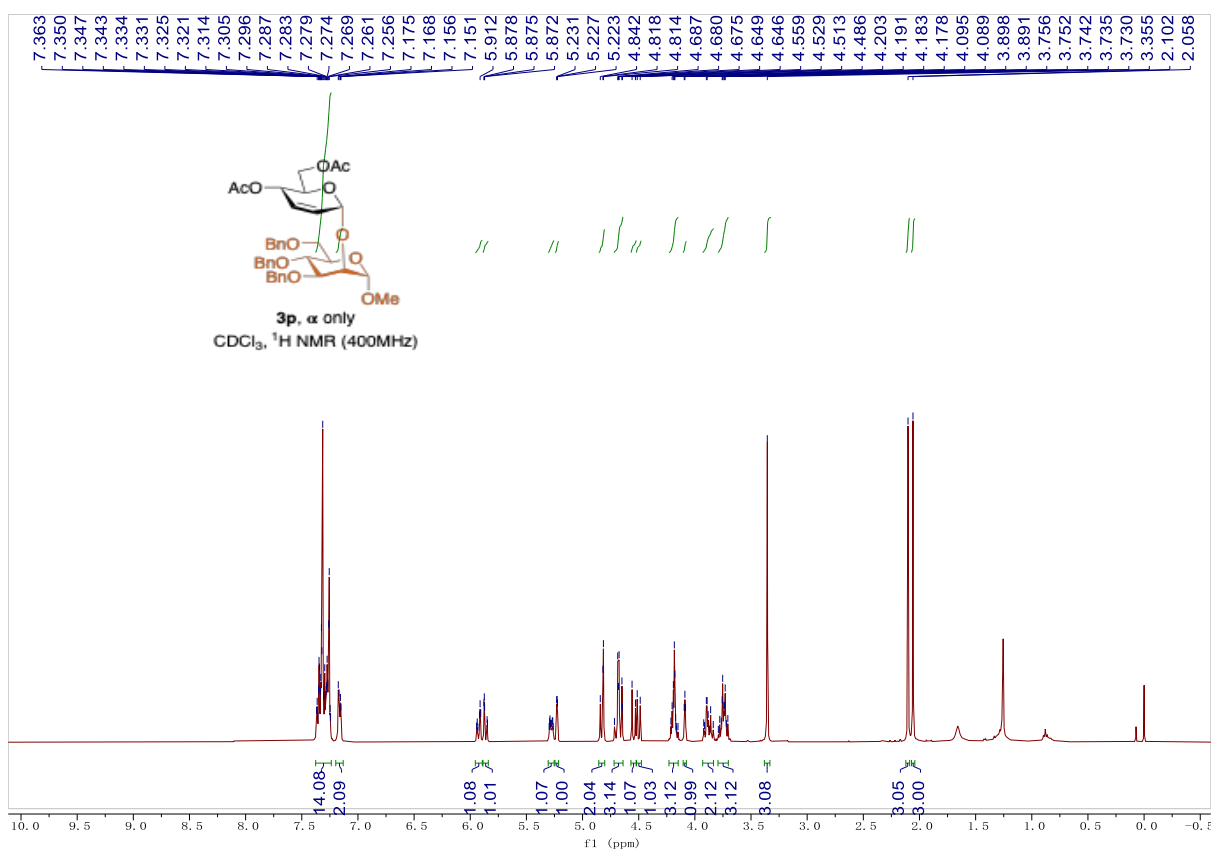

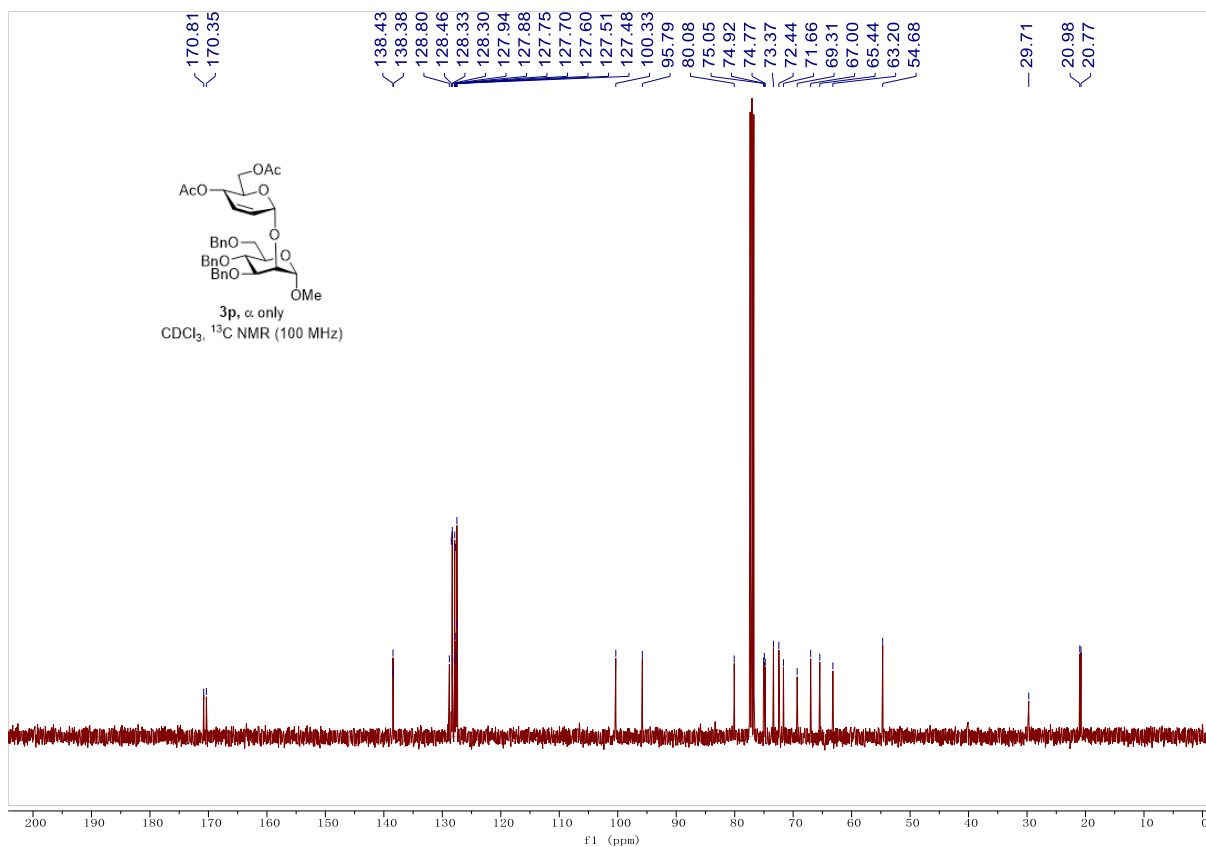

$^1\text{H}$  spectrum for **3q**

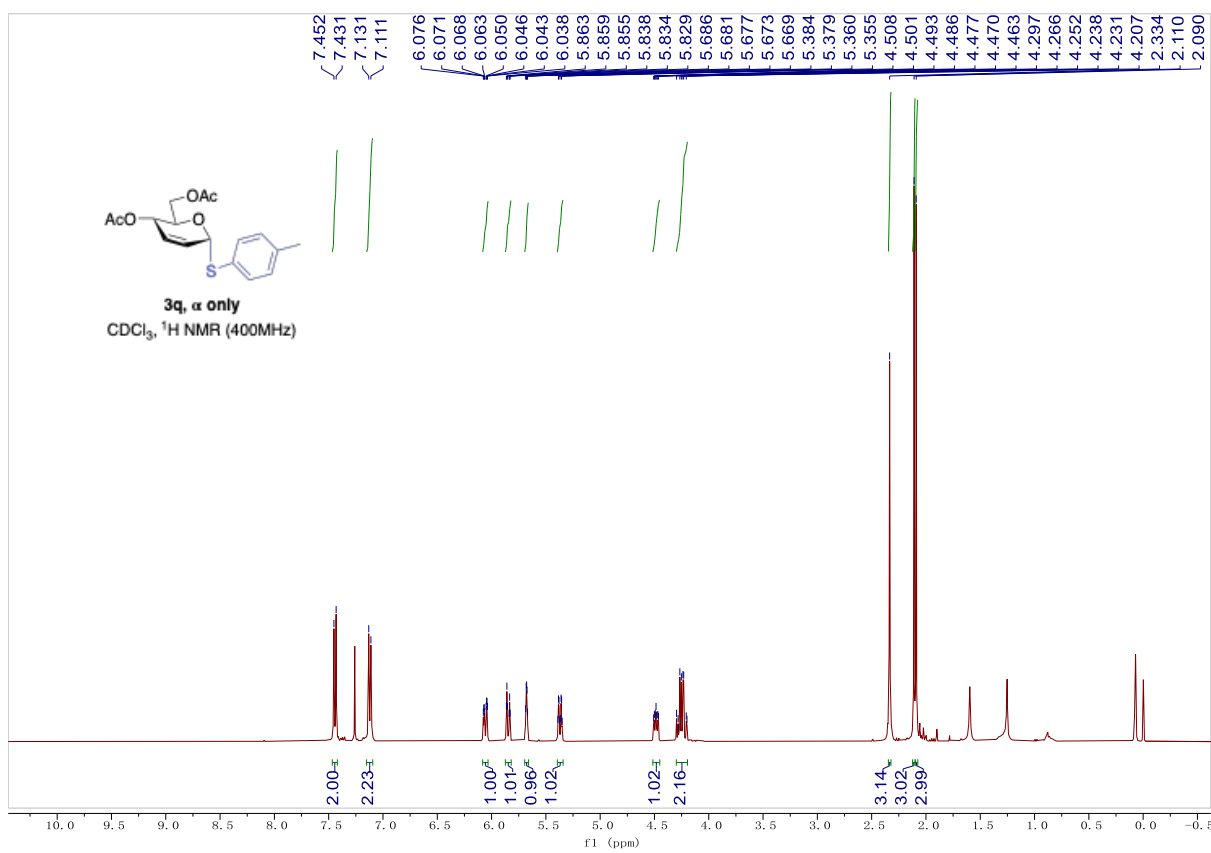

$^1\text{H}$  and  $^{13}\text{C}$  spectra for **3r**

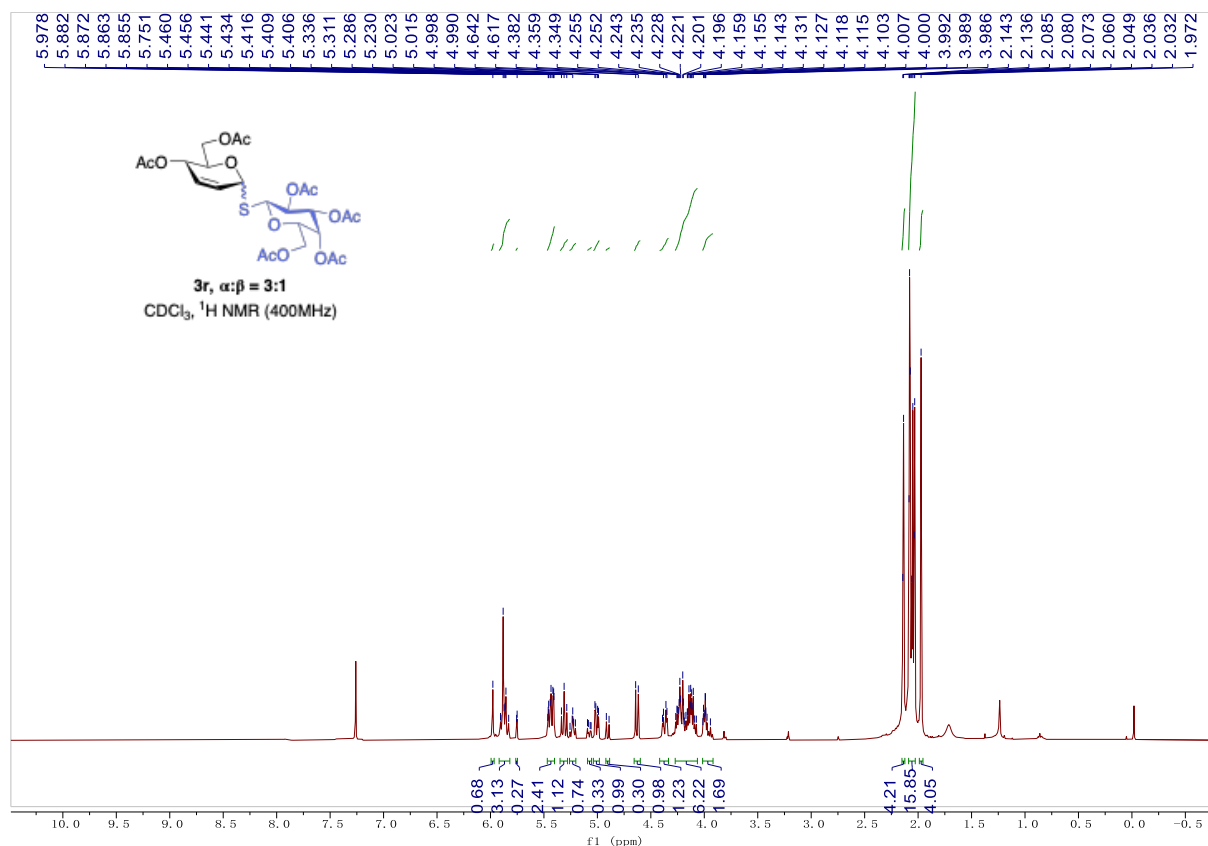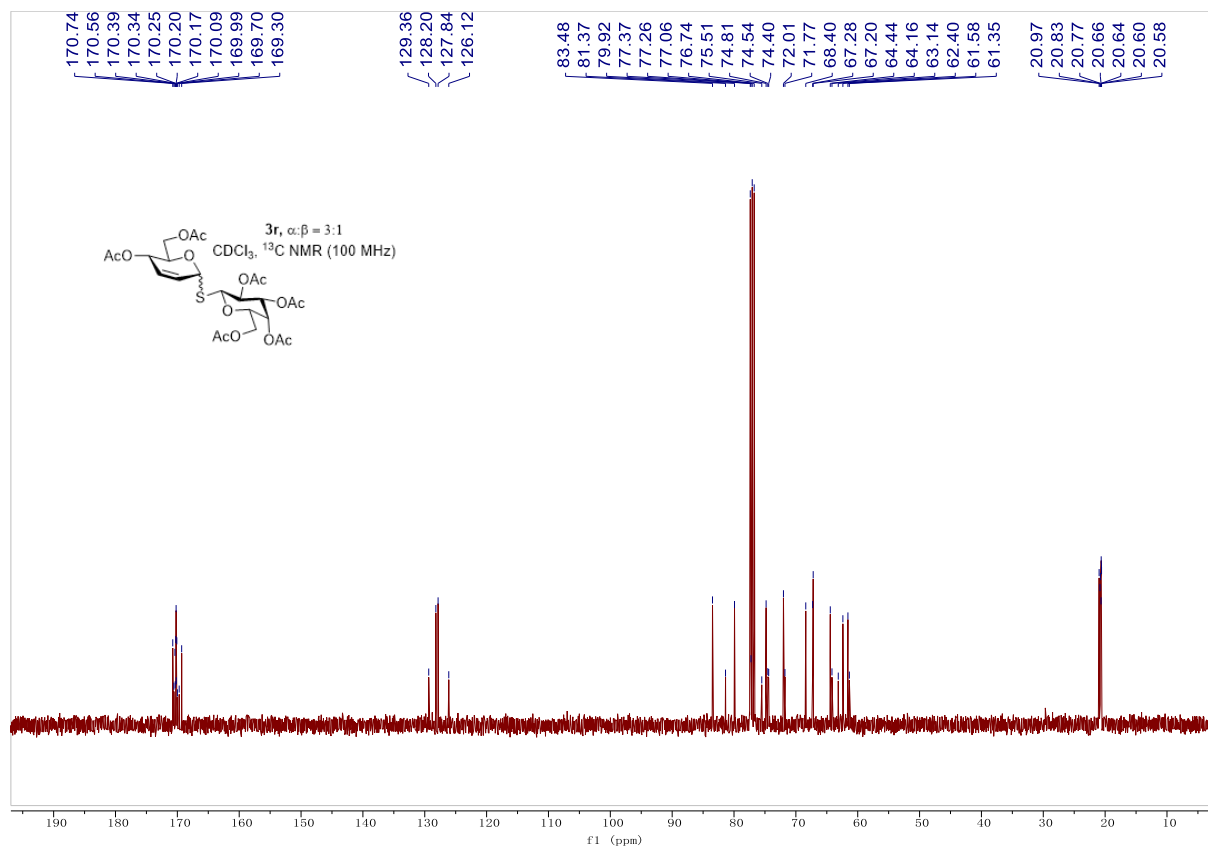



$^1\text{H}$  and  $^{13}\text{C}$  spectra for **3s**

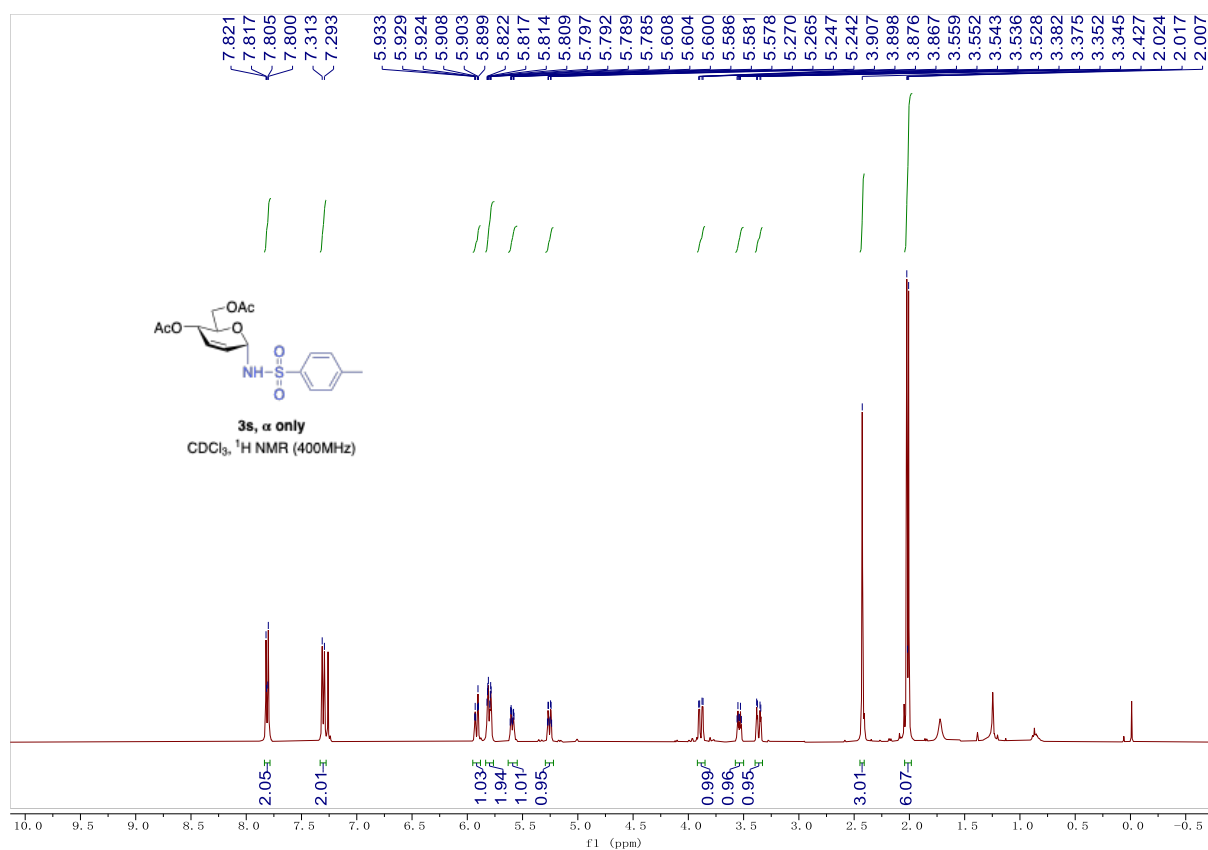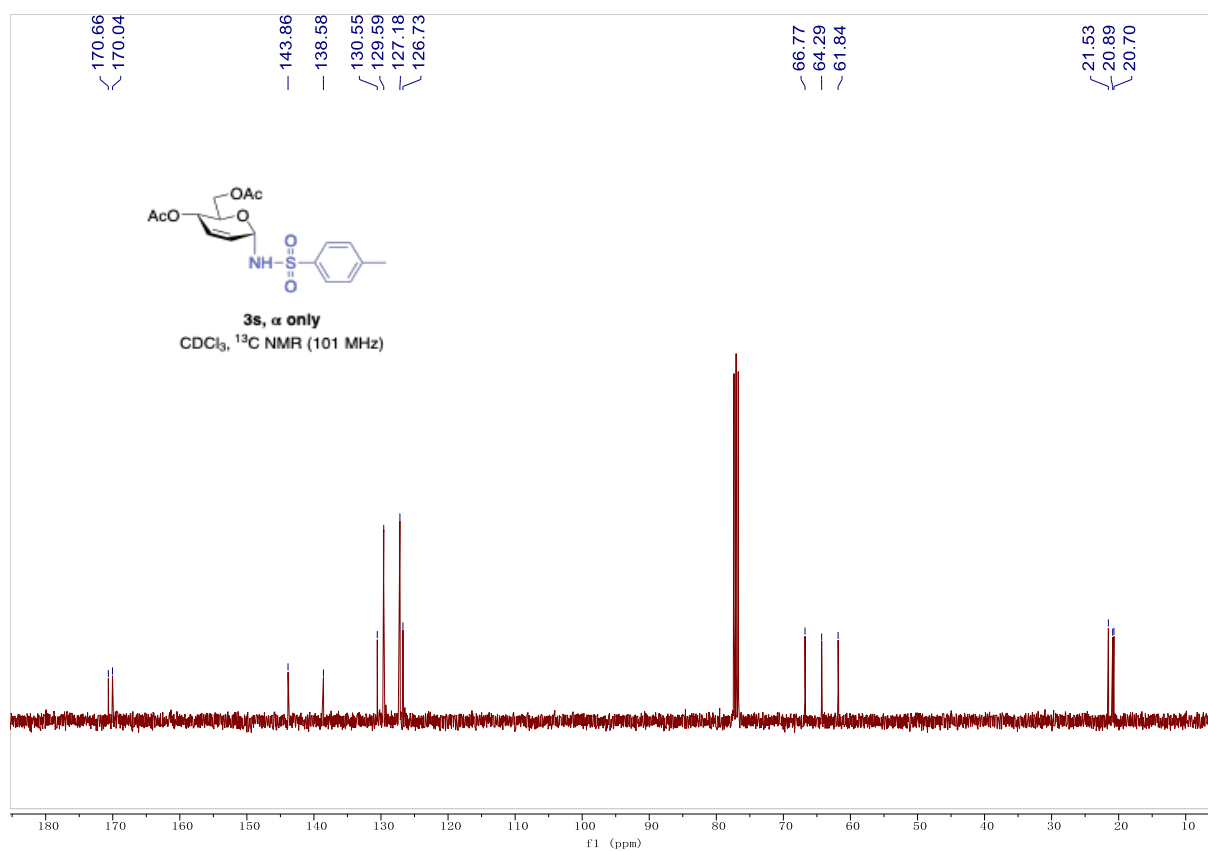

<sup>1</sup>H spectrum for **3t**

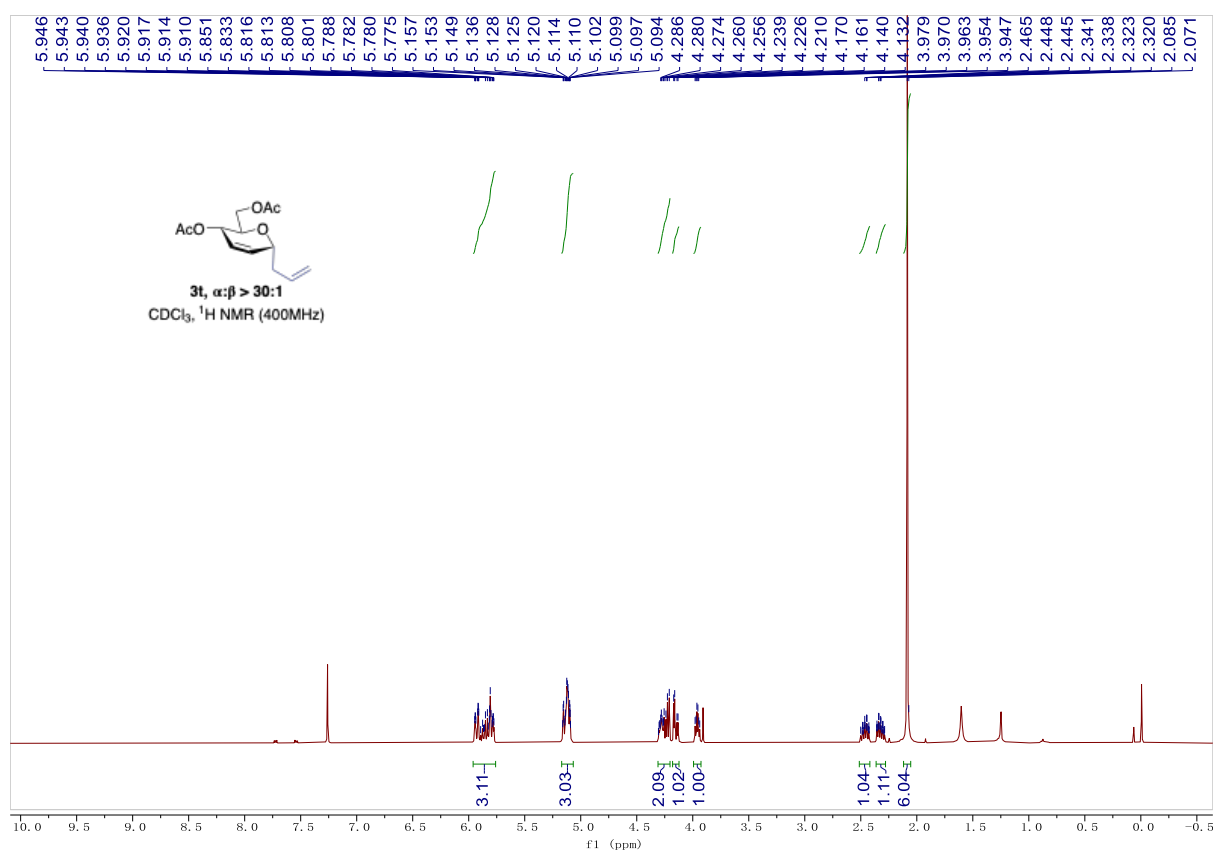

<sup>1</sup>H spectrum for **3u**

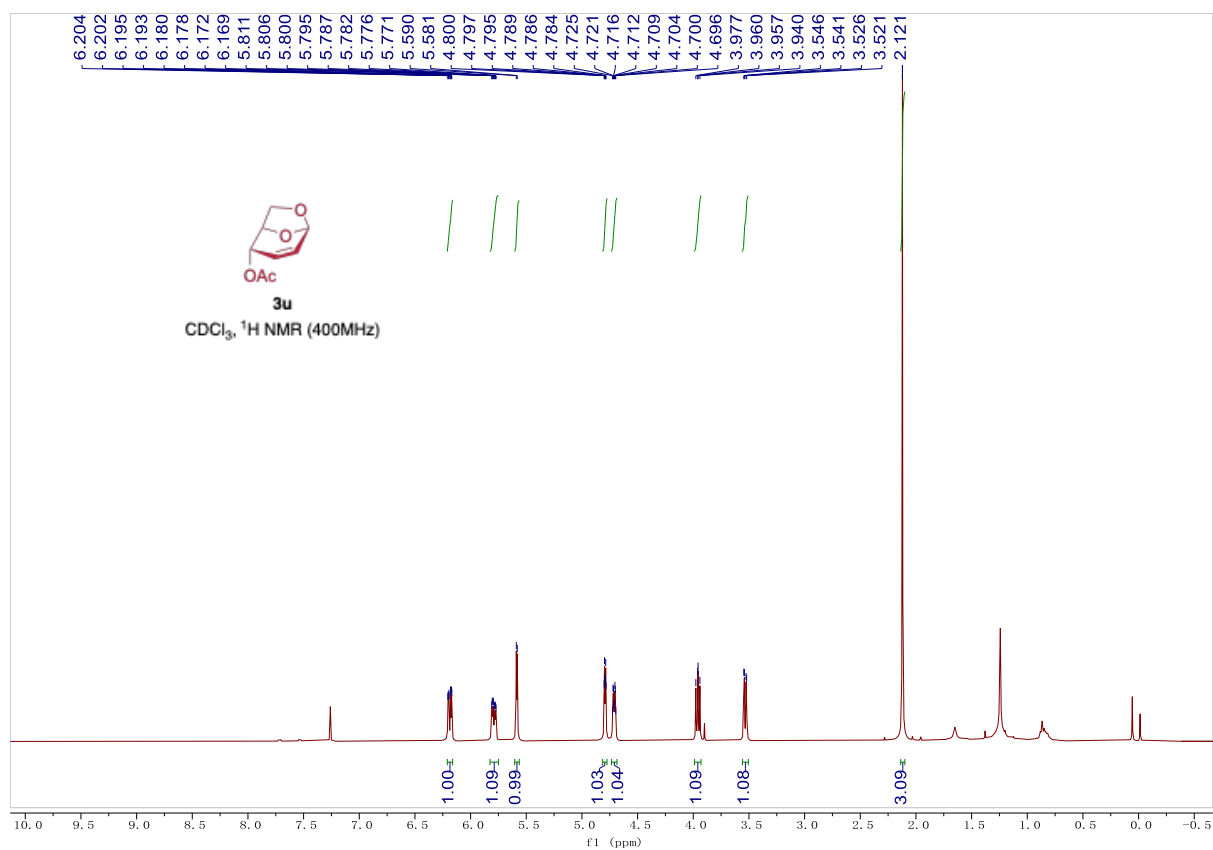

<sup>1</sup>H and <sup>13</sup>C spectra for **3ba**

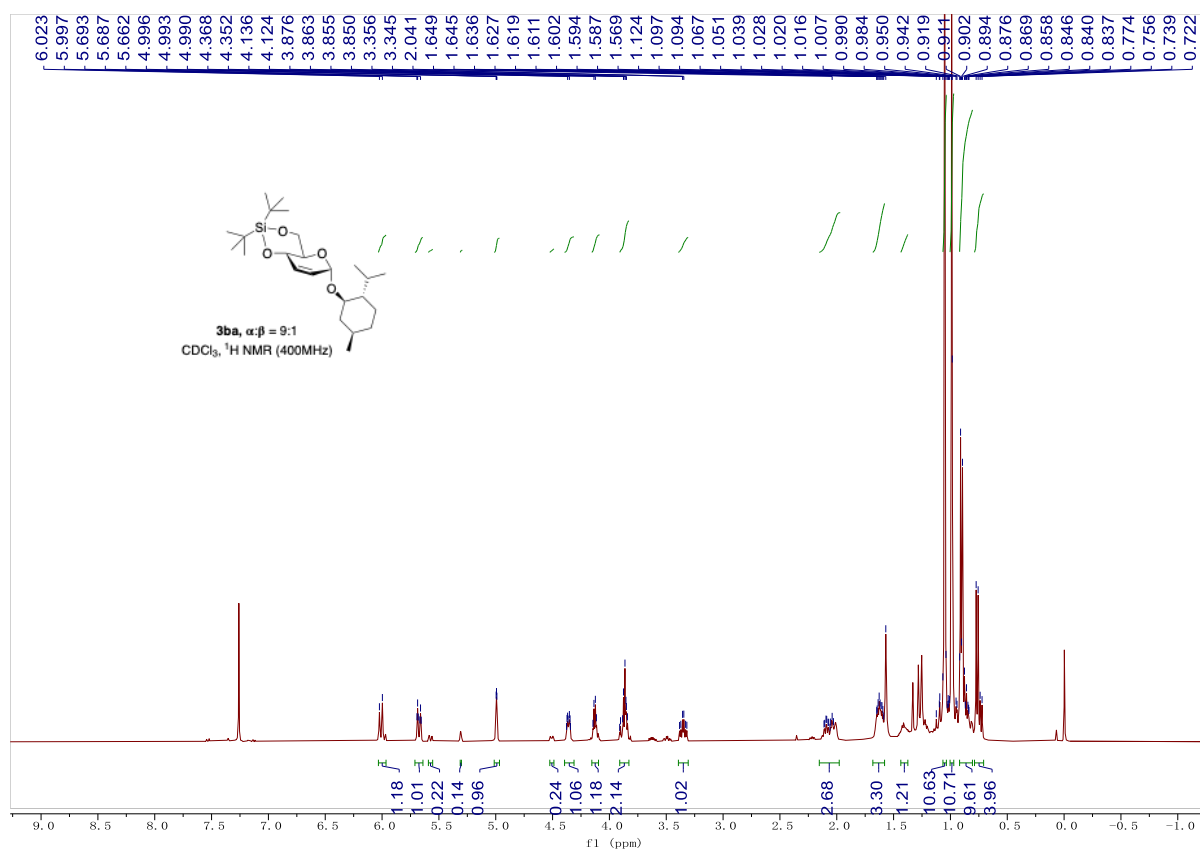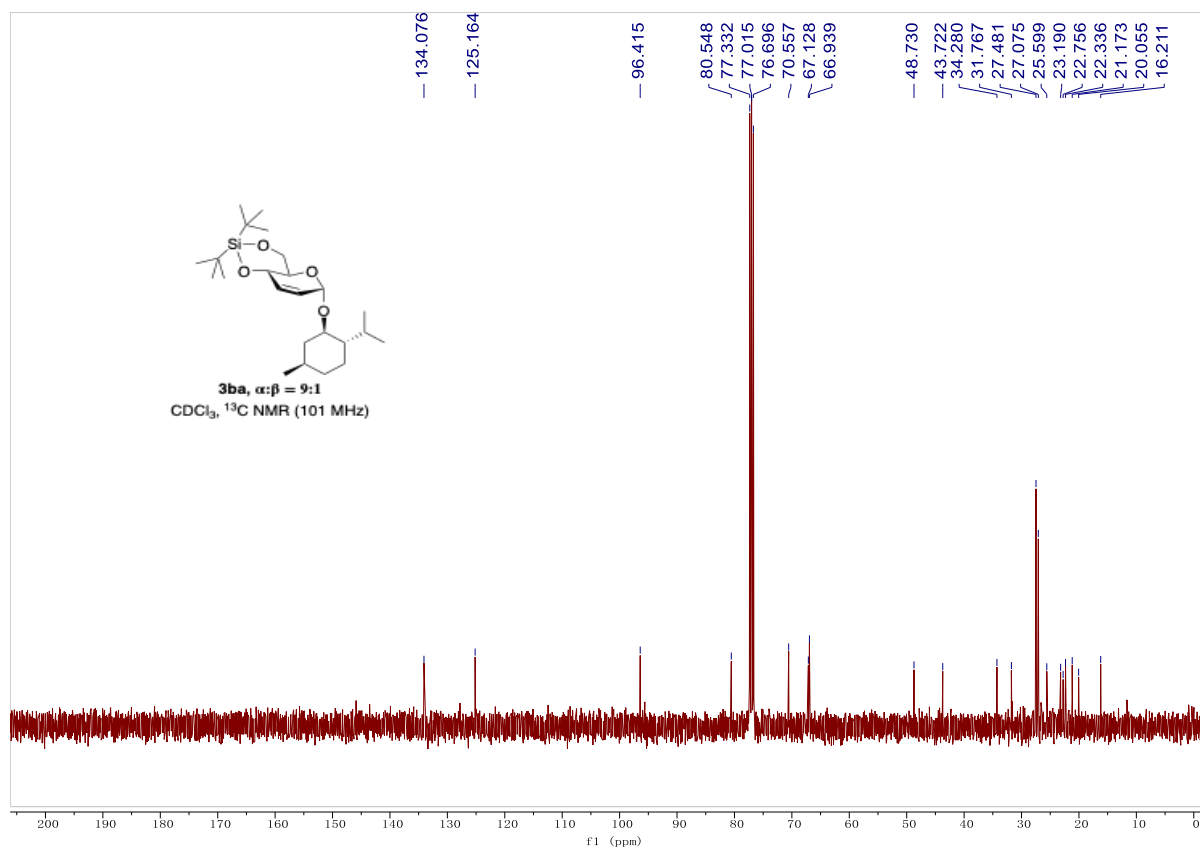

$^1\text{H}$  and  $^{13}\text{C}$  spectra for **3bb**

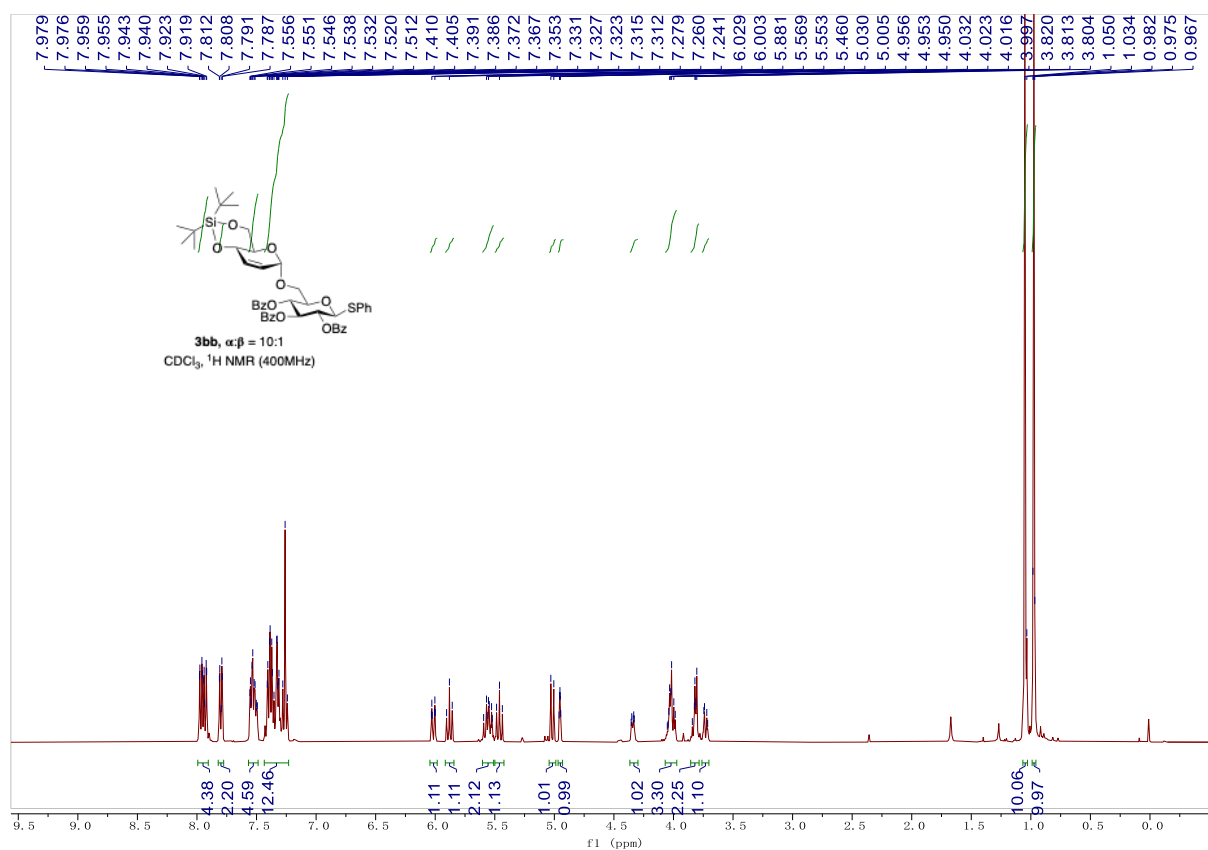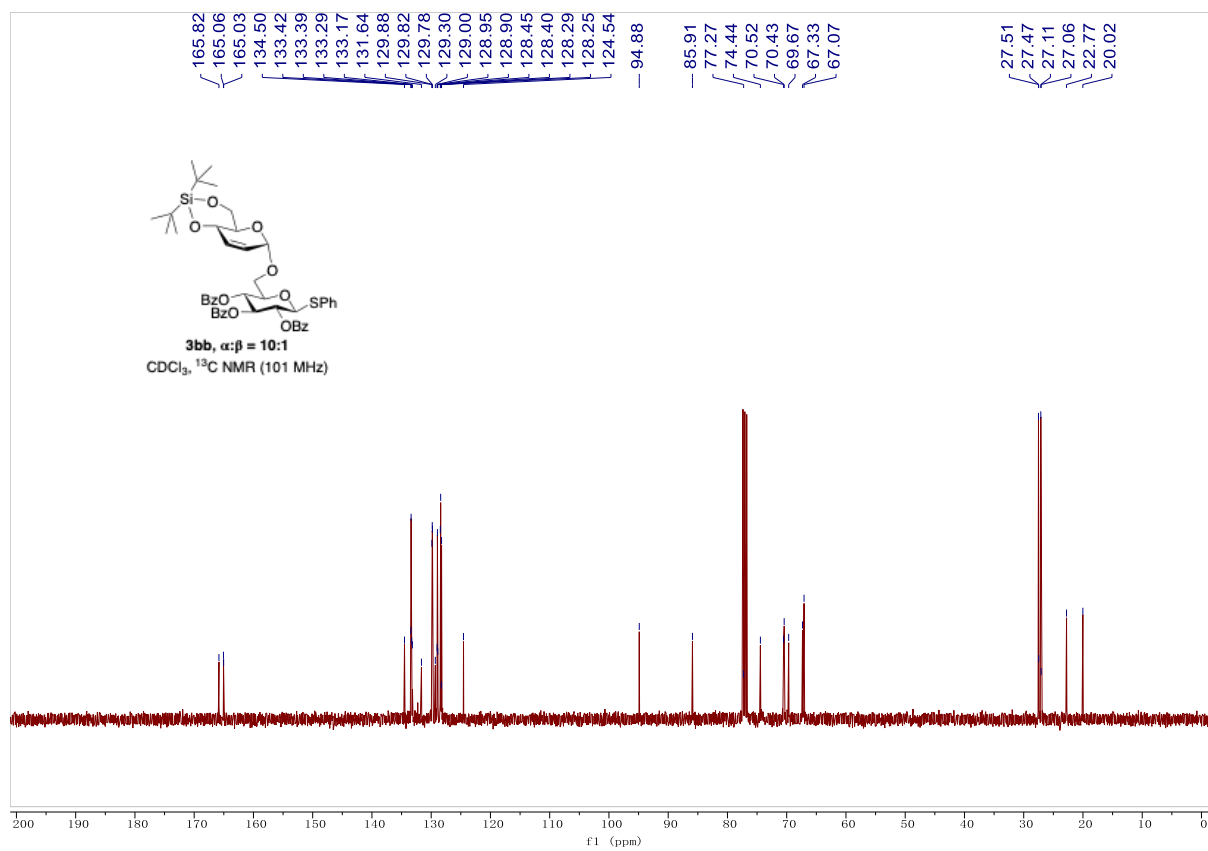

<sup>1</sup>H and <sup>13</sup>C spectra for **3bc**

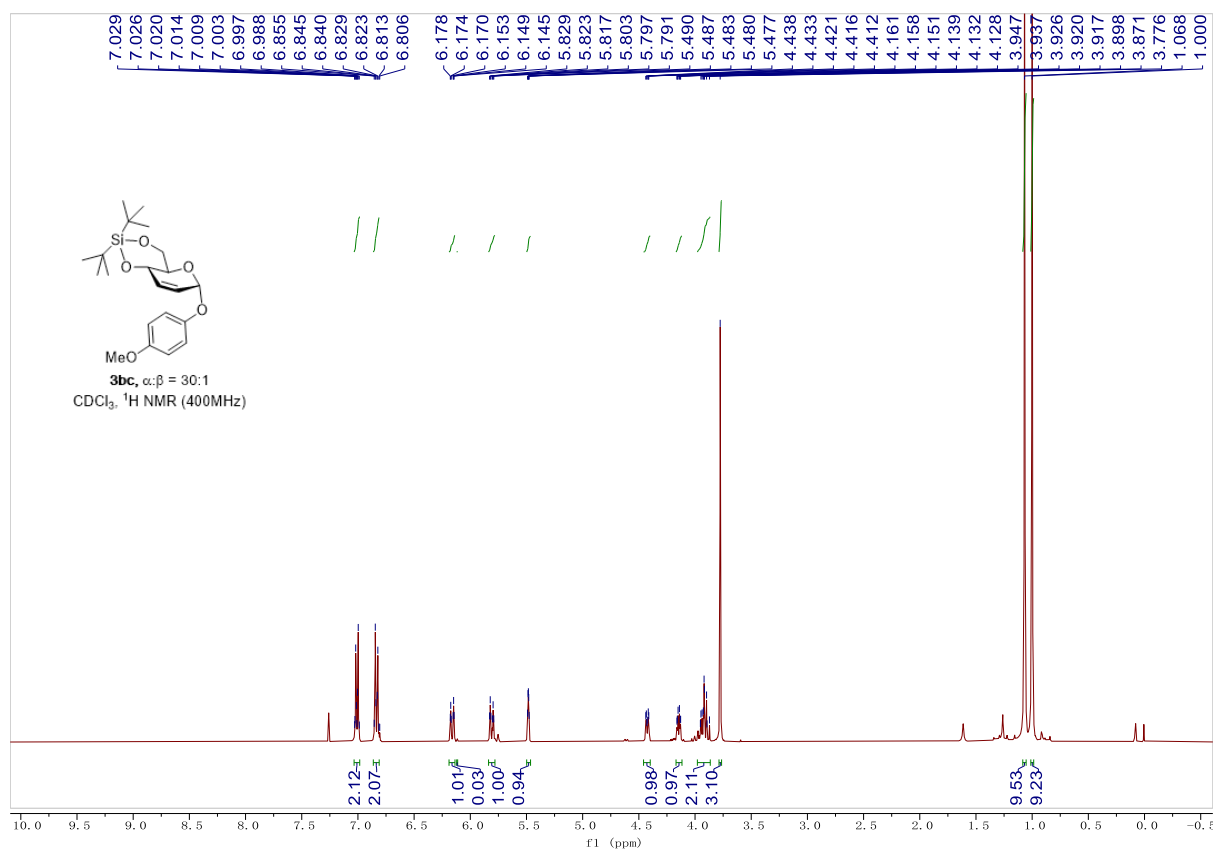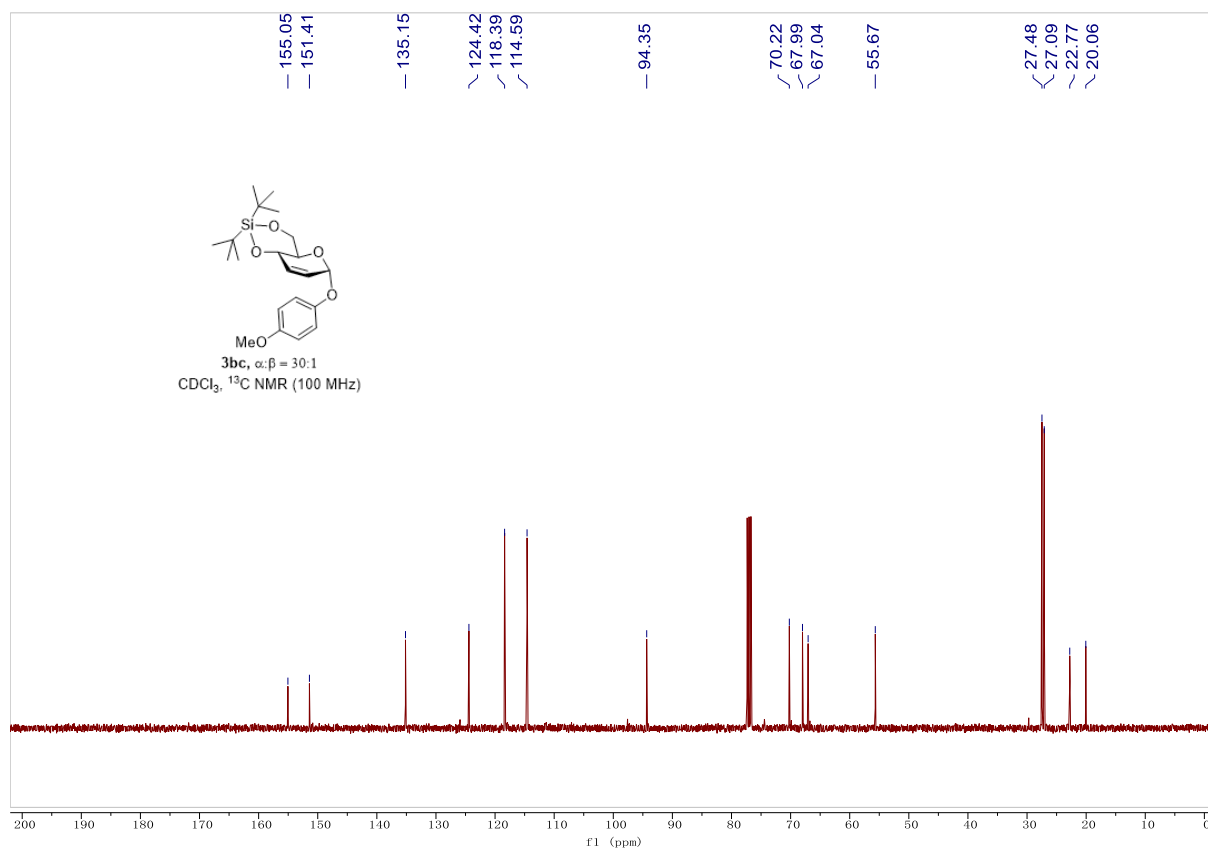

### <sup>1</sup>H spectrum for 3ca

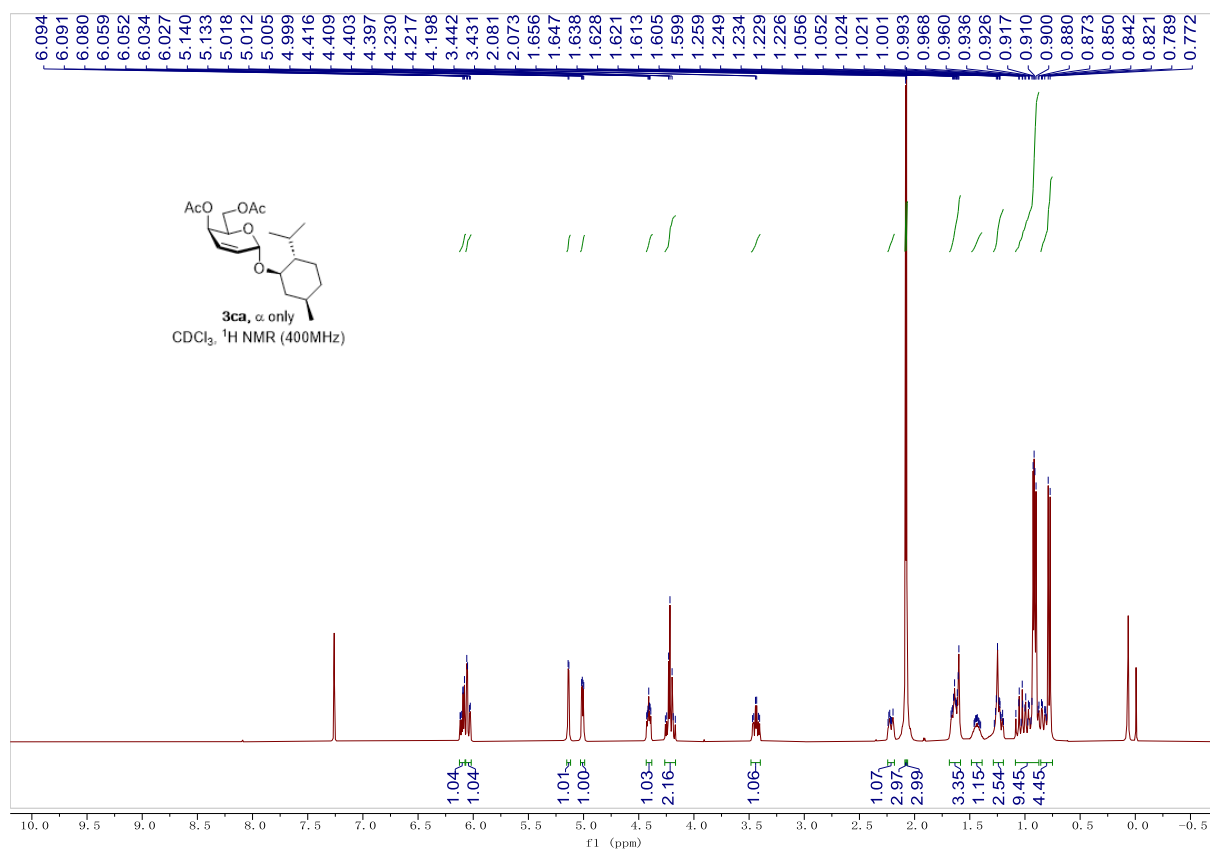

### <sup>1</sup>H spectrum for 3cb

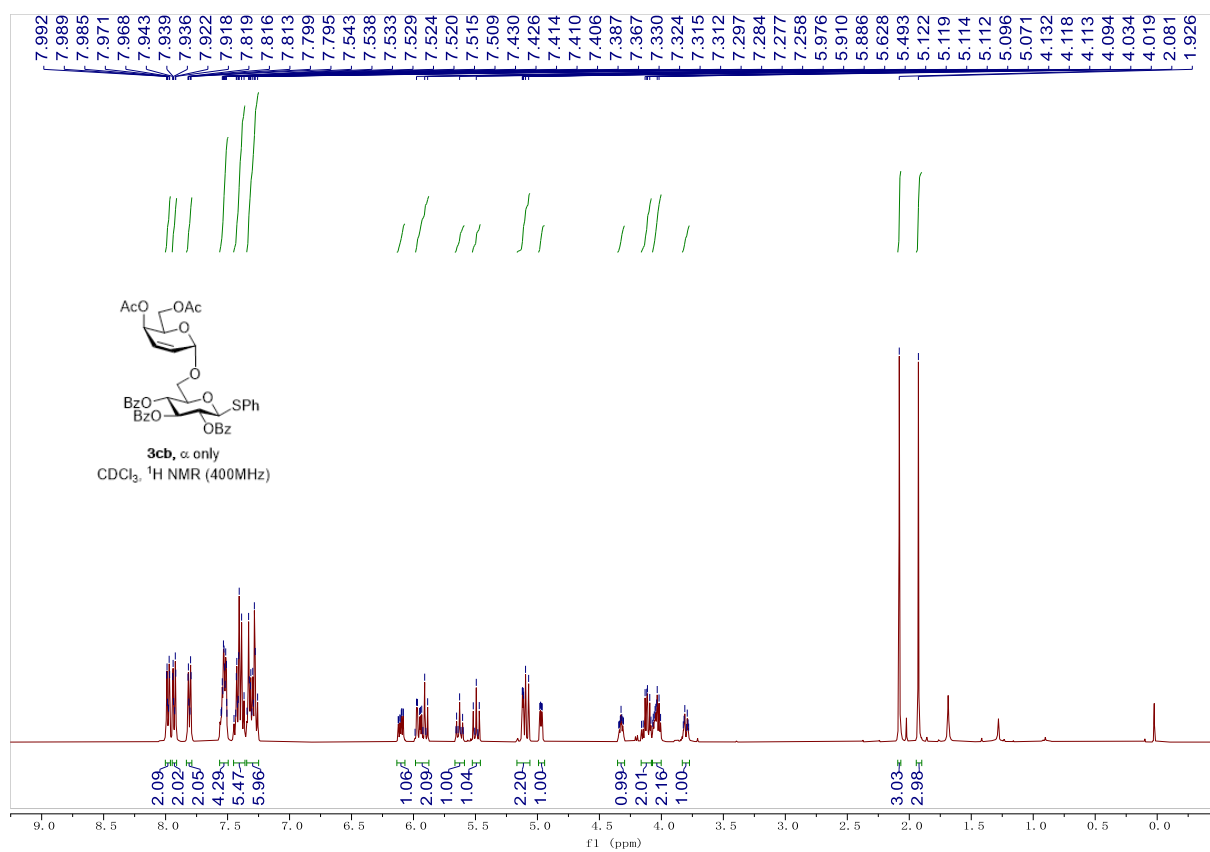

### <sup>1</sup>H spectrum for 3cc

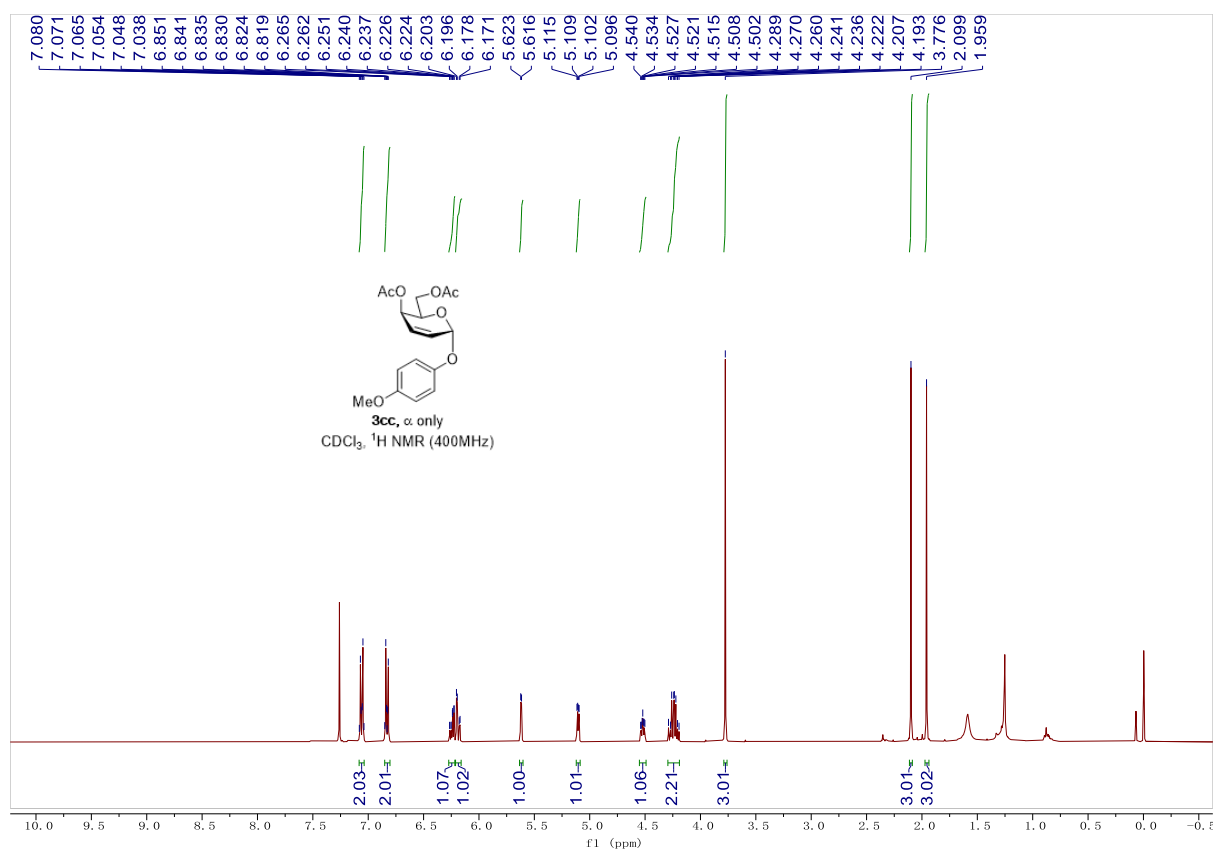

### <sup>1</sup>H spectrum for 3da

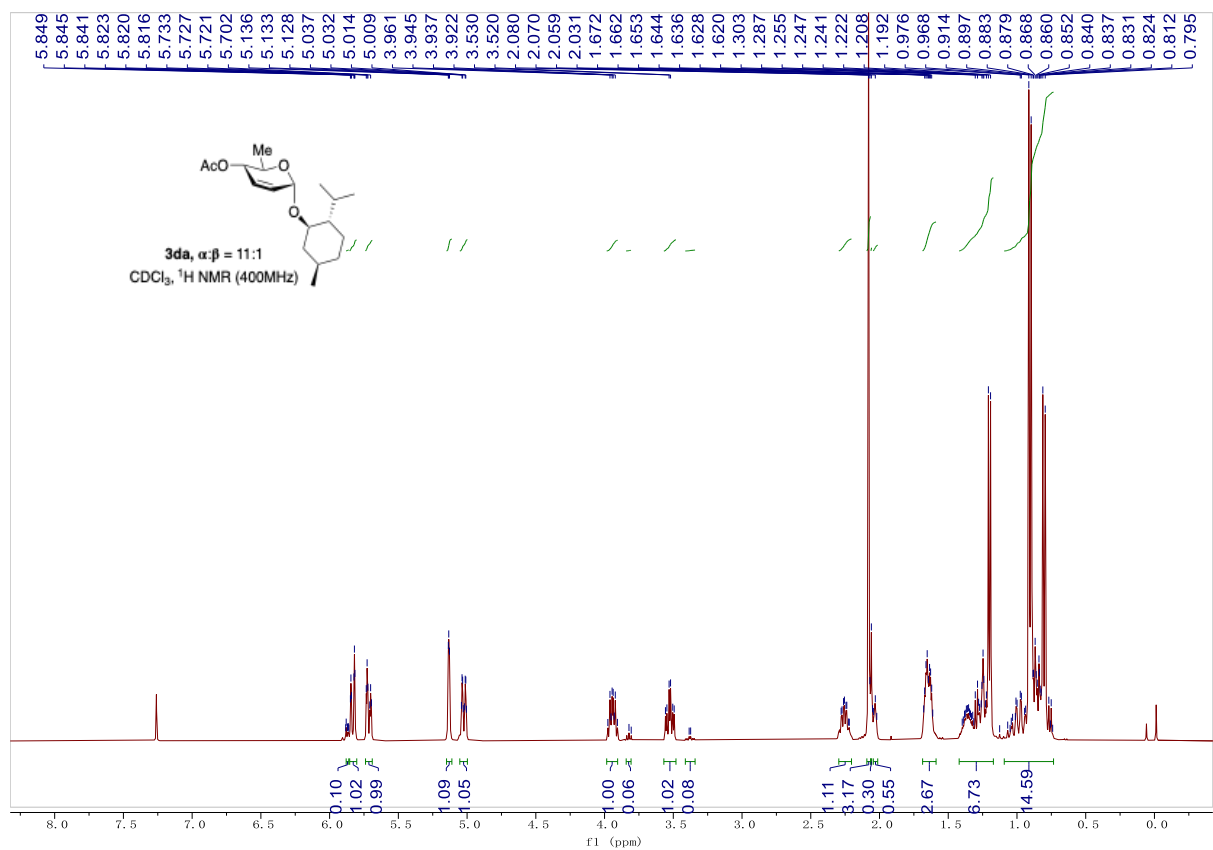

<sup>1</sup>H and <sup>13</sup>C spectra for **3db**

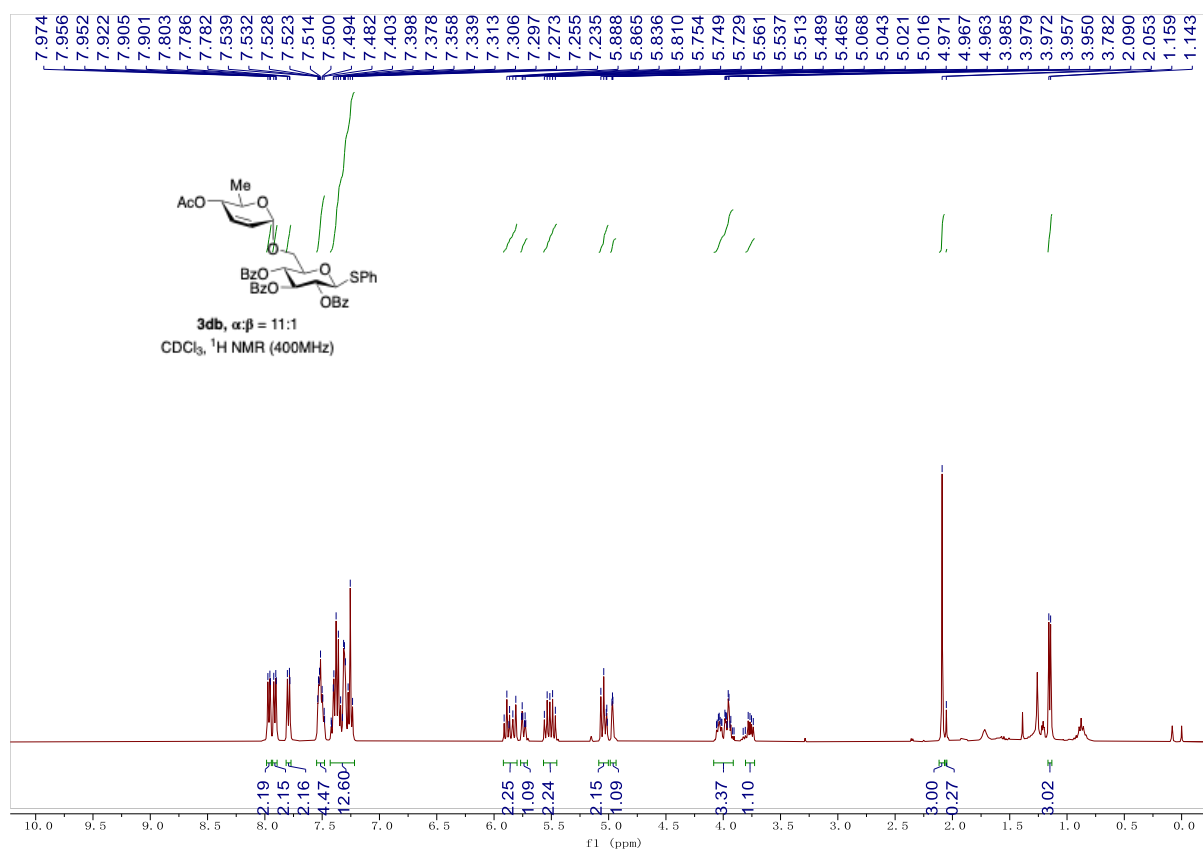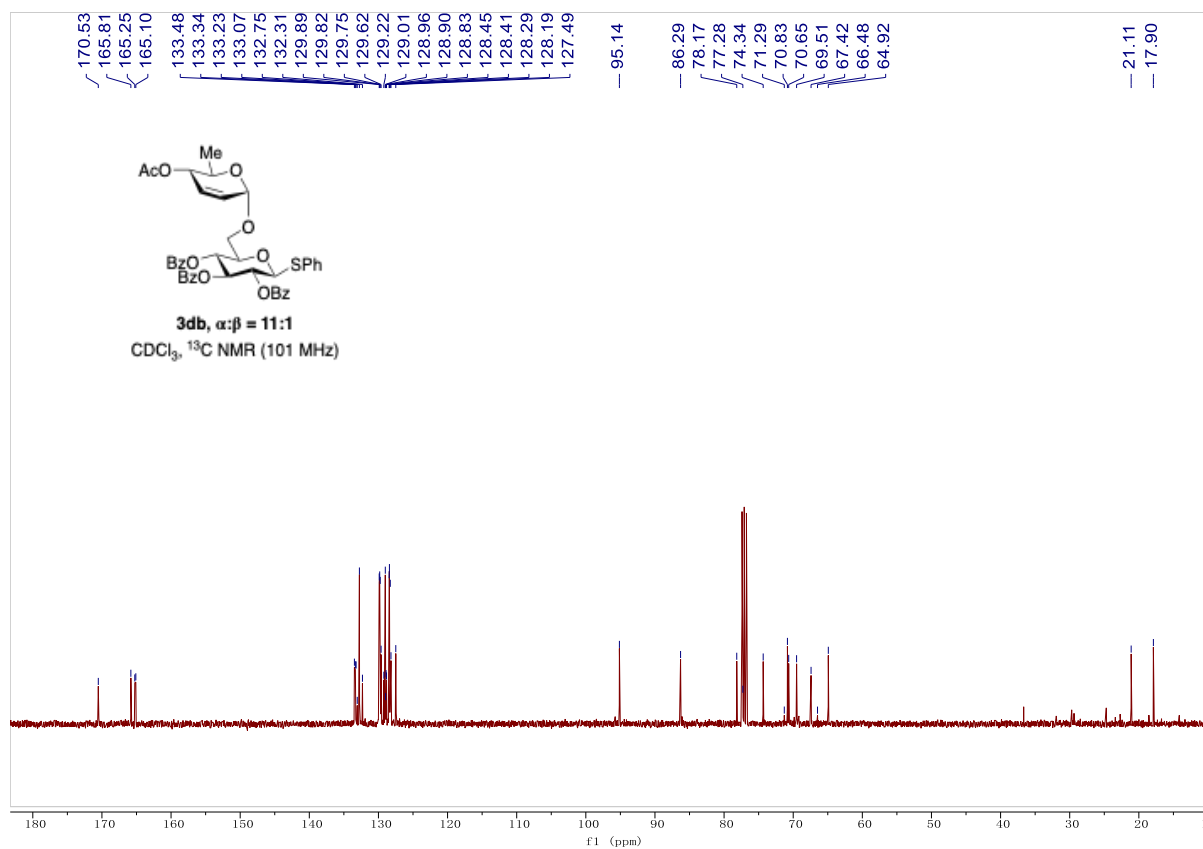



### <sup>1</sup>H spectrum for 3dc

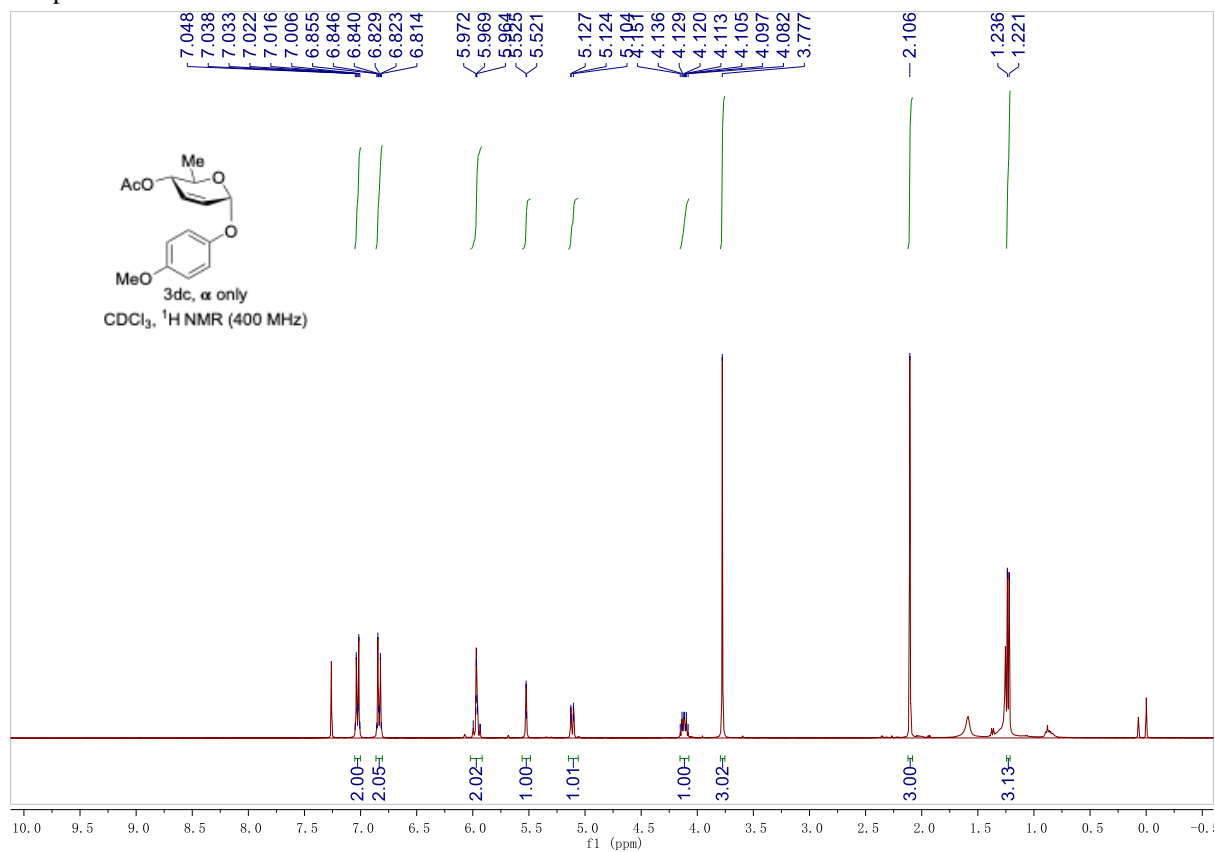

### <sup>1</sup>H and <sup>13</sup>C spectra for 7

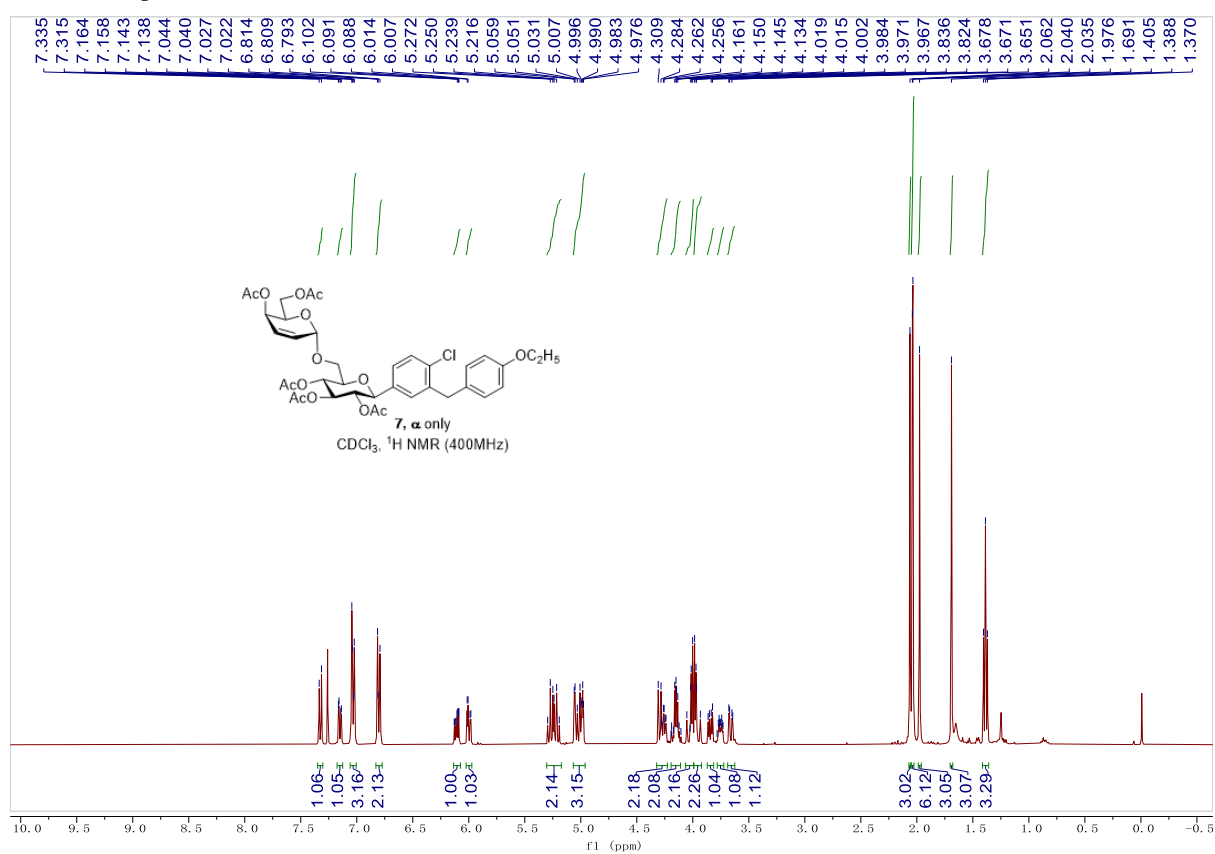

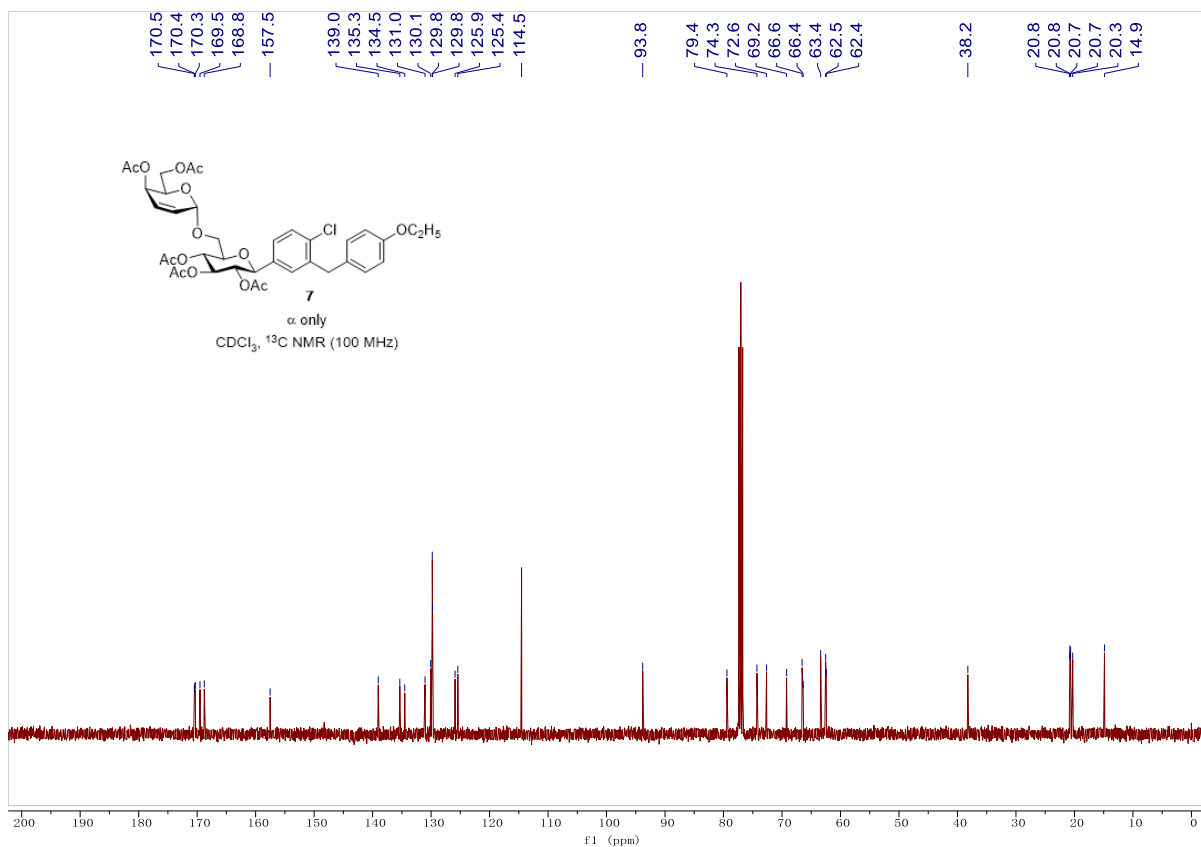

Supplement: d4qo00410h1.pdf [file d4qo00410h1.pdf]
